# Supplementary material for: Cell therapy manufacturing at full clinical scale: enhancing the quality CAR-T cell therapy starting materials through massively parallel automated microfluidic cell sorting
Source: Royal Society of Chemistry journal article supplement (doi:10.1039/d6lc00072j), 2026-04-02
Supplement: d6lc00072j3.xlsx [file d6lc00072j3.xlsx]

## Sheet: N=150 DCS runs
	Average of Total Volume Loaded (mL)	Average of Net Volume Processed (mL)	Autoscaled?	Average of CC Input WBC (e6/mL)	Average of CC Input RBC (e6/uL)	Average of CC Input PLT (e6/mL)	Average of CC Input HCT %	Average of CC Input % Lymph	Average of CC Input % MoNo	Average of CC Input % Gran	Average of CC Process Efficiency (%P)	Average of Product Volume Collected (mL)	Average of CC % WBC Recovery	Average of CC Total WBC in Product	Average of Product WBC Cellularity e6/mL	Average of CC Product % PLT Depletion	Average of CC Lymph % Recovery	Average of CC Mono % Recovery	Average of CC Gran % Recovery	Average of Input CD3+ % of CD45+ FACS	Average of FACS % CD45+ Recovery	Average of Product CD3+ % of CD45+	Average of As Received Viability (%CD45) FACS	Average of As Run Viability (%CD45) FACS	Average of Product % CD45+ Viability	Average of FACS Product % RBC Depletion	Average of FACS Product % PLT Depletion	Average of FACS Input RBC/WBC (235+/45+)	Average of FACS Input PLT/WBC (41+/45+)	Average of FACS Product RBC/WBC (235+/45+)	Average of Product CD3+ % of CD45+	Average of FACS % Mono CD14+ Recovery	Average of FACS % Gran Recovery	Average of FACS % T+B Recovery	Average of FACS % CD56+ NK Recovery	Average of % CD3+ Recovery
LKP 0089	162.73	162.73	No	55.2	0.28	2660	2.6	0.589	0.407	0.001	0.995	168.22	0.925	8306703600	49.38	0.993	0.944	0.895	0.927
LKP 0322	58.4	58.4	No	33.4	0.3	2170	2.6	0.535	0.433	0.027	0.9829	96.4	0.8638	1684816000	17.4773	0.9978	1.076	0.49	1.018	0.1693	0.9756	0.1812	0.9799	0.9926	0.93645	0.9547	0.9866			0.079	0.1812	0.9192	0.614	0.9251		0.995
LKP 0341	186.94	186.94	No	52.3	0.27	1984	2.6	0.652	0.259	0.089	0.9804	185.68	0.9708	9472964000	51.0177	0.9928	0.974	0.863	1.261	0.2645	0.918	0.3236	0.9433	0.9221	0.8889	0.891	0.994			0.018	0.3236	0.913	0.793	0.903		0.9
LKP 0359	174	174	No	43.3	0.23	1244	2.3	0.711	0.156	0.133	0.968	204	0.9254	6956400000	34.1	0.9915	0.986	0.813	0.738	0.4457	0.902	0.4756	0.9753	0.9797	0.9722	0.863	0.992			0.113	0.4756	0.84	0.701	0.904		0.948
LKP 0381	182	182	Autoscaled	36.4	0.32	2010	3	0.527	0.417	0.044	0.991	106	0.9621	6338800000	59.8	0.9901	0.957	0.961	0.915	0.1813	0.958	0.1855	0.9927	0.9927	0.9773	0.889	0.975			0.26	0.1855	0.962	0.782	0.947		0.964
LKP 0394	148	148	No	37.5	0.27	1278	2.6	0.774	0.186	0.04	0.969	100	0.9304	5150000000	51.5	0.9974	0.915	0.885	1.418	0.3422	0.95	0.3569	0.9776	0.9405	0.9405	0.978	0.997	3.04	51.82	0.07	0.3569	0.893	0.655	0.931		0.973
LKP 0395	192	192	No	45.7	0.27	1700	2.7	0.739	0.12	0.141	0.979	148	0.8587	7518400000	50.8	0.9923	0.789	1.109	1.011	0.4362	0.887	0.4454	0.9845	0.9723	0.929	0.96	0.995	1.75	56.78	0.08	0.4454	0.862	0.834	0.882		0.893
LKP 0415	189	189	No	42	0.28	1740	3	0.837	0.128	0.035	0.926	184	0.8152	6440000000	35	0.9922	0.727	1.208	1.441	0.5199	0.789	0.4472	0.8129	0.9868	0.9898	0.921	0.996	1.588	103.238	0.15	0.4472	1.228	0.955	0.78		0.682
LKP 106545B	207.4	207.4	No	49.8	0.19	1836	2.27	0.6963	0.29567	0.00433	0.993	178.98	0.866	7620000000	42.5746	0.993	0.984	0.573	0.866
LKP 106553B	187.2	180.64	No	61.06	0.24	2200	2.6	0.751	0.231	0.008	0.984	98.78	0.868	9410000000	95.2622	0.993	0.908	0.714	0.868		0.97				0.966	0.995
LKP 109938	95.86	95.86	No	70	0.3	2970	3.2	0.649	0.332	0.006	0.974	39.26	0.879	5865444000	149.4	1	0.847	0.92	0.731
LKP 109947	71.5	71.5	No	102.5	0.6	2370	5.5	0.813	0.012	0.028	0.96	41.95	0.864	6267330000	149.4	1	0.804	1.178	0.83
LKP 109949	154.95	154.95	No	65	0.3	1705	3.5	0.658	0.233	0.1	0.995	99.98	0.983	9748050000	97.5	1	1.022	0.837	0.941
LKP 109956B	150.9	150.9	No	80	0.36	2922	3.4	0.718	0.216	0.064	0.995	157.8	0.829	9957000000	63.0989	1	0.842	0.821	0.673
LKP 109962B	164.32	164.32	No	57.6	0.16	2466	2	0.482	0.293	0.22	0.97	166.8	0.889	8356680000	50.1	0.987	0.934	0.803	0.851
LKP 109966B	199.62	199.62	No	69.3	0.19	1804	2.4	0.701	0.29	0.005	0.987	192.87	0.923	12729420000	66	0.996	0.962	0.831	0.369
LKP 109968B	220.63	220.63	No	46.5	0.4	1906	3.2	0.674	0.314	0.008	1	192.19	0.911	9301000000	48.3948	0.994	0.977	0.719	1.252
LKP 109986	94.2	94.2	No	77.2	0.2	1126	2.8	0.542	0.157	0.297	0.982	41.85	0.91	6570450000	157	1	0.884	0.955	0.939
LKP 109999	199.43	199.43	No	46.6	0.17	2644	2.8	0.823	0.164	0.009	0.986	183.32	0.878	8157000000	44.496	1	0.868	0.933	0.88
LKP 110009	244.61	244.61	No	45.2	0.24	1561	2.3	0.607	0.379	0.007	0.979	230.51	0.836	9197349000	39.9	1	0.878	0.737	0.836
LKP 110021	93.82	93.82	No	95.5	0.5	2675	5	0.801	0.195	0	0.945	44.4	0.74	6562320000	147.8	1	0.72	0.794	0
LKP 110036	99.87	99.87	No	55.2	0.32	1329	3	0.738	0.242	0.016	0.99	123.66	0.916	5032962000	40.7	1	0.935	0.868	0.688
LKP 110123	102.86	102.86	No	127	0.3	1950	5	0.537	0.317	0.141	0.948	127	0.616	8623000000	67.8976	1	0.488	0.375	0.141
LKP 1177	163.32	163.32	No	101	0.3	2160	4	0.81	0.17	0.014	0.982	153.8	0.816	13995800000	91	0.985	0.869	0.578	0.61
LKP 1219	182.19	182.19	No	32	0.1	1840	2	0.759	0.202	0.036	0.981	98.84	0.983	5732000000	57.9927	1	1.159	0.889	0.726
LKP 1425	76	76	No	41.5	0.33	1773	2.9	0.703	0.278	0.017	0.9875	104	0.9685	3047200000	29.3	0.9925	0.983	0.935	0.969	0.5487	0.8616	0.6287	0.9405	0.9425	0.924	0.825	0.9538			0.165	0.6287	0.4576	0.9953	0.855		0.9841
LKP 184434	164.76	164.76	No	56.8	0.21	1391	2.7	0.71	0.269	0.008	0.985	177.17	0.897	8380140000	47.3	0.997	0.973	0.704	0.561	0.5853	0.882	0.5806	0.9874	0.9874	0.9917						0.5806	0.91	0.33	0.88		0.8742
LKP 184592	84.1	84.1	No	168	0.45	1720	5.75	0.6985	0.249	0.0425	0.972	108.9	0.86	12139627500	111.475	1	0.881	0.789	0.87	0.5634	0.926	0.5644	0.983	0.9912	0.9893	0.984	0.992	0.171	12.91	0.002	0.5644	0.93	0.86	0.93		0.9275
LKP 184634	144.03	144.03	No	41.1	0.19	953	1.87	0.786	0.167	0.0443	0.931	96.72	0.924	5445340000	56.3	0.991	0.94	0.988	1.537	0.5265	0.9	0.5153	0.9476	0.9517	0.9187	0.861	0.996	0.651	27.66	0.101	0.5153	0.97	0.64	0.88		0.8824
LKP 184708	110.45	110.45	Autoscaled	42.5	0.3	1875	3	0.658	0.328	0.007	0.975	133	0.915	4242700000	31.9	0.95	0.926	0.873	1.176	0.4055	0.964	0.407	0.9475	0.9638	0.941	0.854	0.969	0.731	42.99	0.111	0.407	0.98	0.9494	0.94		0.9653
LKP 184843	180.66	180.66	No	98.4	0.29	2322	3.3	0.7485	0.2315	0.013	0.9806	190.27	0.93	16515436000	86.8	1	1.004	0.663	0.787
LKP 184851	205.69	205.69	No	67.3	0.33	2172	3	0.7785	0.216	0.002	0.9735	216.9	0.905	12515130000	57.7	1	0.971	0.65	0.905
LKP 184883	40.89	40.89	No	107.5	0.5	2193	4.4	0.726	0.272	0.001	0.9793	73.12	0.927	4072784000	55.7	0.98	1.125	0.317	24.113	0.1264	0.958	0.6042	0.9536	0.9525	0.9857	0.885	0.966	0.261	23.45	0.031	0.6042	0.97	0.2501	0.77	0.99	0.8052
LKP 184967	145.1	145.1	Autoscaled	63.2	0.3	2696.67	2.95	0.6315	0.3215	0.034	0.957	141.23	0.822	7527559000	53.3	0.914	0.827	0.829	0.798	0.6489	0.8	0.6538	0.9441	0.945	0.9414	0.858	0.937	0.5	44.07	0.09	0.6538	0.79	0.6623	0.78	0.84	0.7835
LKP 185047	150.93	150.93	No	62.6	0.3	2012	1.5	0.671	0.303	0.022	0.977	166.6	0.933	8813140000	52.9	1	0.976	0.814	0.764
LKP 185072	189.89	189.89	No	39.8	0.3	2940	2.4	0.66	0.328	0.006	0.94	50.2	0.831	6249900000	124.5	1	0.879	0.689	0.97
LKP 185077	191.09	191.09	No	46.8	0.24	2280	2.8	0.642	0.249	0.004	0.957	45.67	0.903	8073910000	176.788	1	0.882	0.944	1.017
LKP 185115	93.98	93.98	No	90.6	9.24	2982	3.2	0.756	0.229	0.008	0.957	44.74	0.836	7104700000	158.8	0.999	0.863	0.719	0.836
LKP 185118	105.75	105.75	No	71.1	0.19	1779	2.2	0.757	0.229	0.011	0.978	189.76	0.869	6527744000	34.4	0.991	0.914	0.718	0.553
LKP 185145	132.02	132.02	No	83.5	0.24	2444	2.95	0.6485	0.3075	0.035	0.995	127.68	0.872	9601536000	75.2	1	0.969	0.632	0.822
LKP 185174	149.84	149.84	No	49.7	0.31	2852	2.7	0.551	0.44	0.005	0.966	44.5	0.856	6363000000	142.989	0.999	0.995	0.636	0.856
LKP 185195	237.37	237.37	No	75	0.23	1449	2.7	0.774	0.331	0.003	0.924	100.49	0.741	13164190000	131	1	0.728	0.506	1.978
LKP 185227	58.64	58.64	No	87.45	0.265	2924	3	0.766	0.224	0.0065	0.946	84.46	0.81	4146986000	49.1	1	0.848	0.687	0.498
LKP 185355	201.2	201.2	No	47.2	0.32	2790	3	0.683	0.306	0.003	0.993	204.2	0.919	8658080000	42.4	1	0.945	0.812	2.76
LKP 185469	73.49	73.49	No	80.2	0.4	3338	3.8	0.744	0.241	0.012	0.993	103.44	0.873	5120280000	49.5	0.999	0.875	0.869	0.727
LKP 185515	186.97	186.97	No	43	0.18	1778	2	0.769	0.218	0.004	1	191.27	0.877	6981355000	36.5	1	0.895	0.783	1.094
LKP 193249	122.46	122.46	No	52.4	0.28	3002	2.4	0.741	0.245	0.007	0.992	143.77	0.8715	5549522000	38.6	0.995	0.922	0.703	0.87
LKP 193865	220.3	220.3	No	46.4	0.19	1429	2.3	0.669	0.274	0.05	1	217.19	0.898	9143699000	42.1	1	0.936	0.784	0.935
LKP 194416	83.84	83.84	No	132.16	0.35	2573	4.48	0.71	0.2622	0.0246	0.996	114.4	0.86	9518080000	83.2	1	0.753	0.208	0.029
LKP 194467	65	65	No	123	0.45	2450	5	0.734	0.241	0.02	0.984	119.76	0.888	7101768000	59.3	0.998	0.879	0.928	0.916
LKP 194561	163.3	163.3	No	58.17	0.15	2541.67	2	0.756	0.216	0.023	0.9	96.74	0.805	7590000000	78.4577	1	0.861	0.594	0.792
LKP 194570	156.4	156.4	No	74.54	0.23	2107	3	0.5767	0.29	0.123	0.985	42.2	0.748	5600000000	132.701	0.995	0.862	0.553	0.663
LKP 195956	190.1	190.1	No	62.46	0.18	2190	2.33	0.5723	0.251	0.168	0.994	174.83	0.808	9050000000	51.7646	0.998	0.927	0.692	0.579
LKP 197249	90.3	90.3	No	55.2	0.16	1625	2.1	0.774	0.188	0.026	0.957	117.3	0.863	4293180000	36.6	0.998	0.868	0.854	0.896	0.6074	0.909	0.6046	0.9907	0.9992	0.9863	0.853	0.995	0.427	25.35	0.069	0.6046	0.94	0.9602	0.9		0.8994
LKP 197912	150.33	150.33	No	45.9	0.35	3300	2.3	0.6855	0.2745	0.0195	0.984	161.2	0.969	6673680000	41.4	0.998	0.942	1.088	0.398	0.4502	0.917	0.4483	0.8923	0.9275	0.9505	0.937	0.993	0.298	72.03	0.021	0.4483	0.93	0.81	0.91	0.9856	0.9101
LKP 197937	48.83	48.83	No	46.88	0.19	2267.5	1	0.684	0.303	0.0075	0.978	43.66	0.803	1833720000	42	0.995	0.851	0.652	1.07	0.3546	0.799	0.3777	0.9804	0.9729	0.9732	0.941	0.996	0.409	33.42	0.03	0.3777	0.69	0.7473	0.84	0.5088	0.8482
LKP 198053	105.39	105.39	No	61.4	0.17	943	2.1	0.698	0.237	0.06	0.892	42.25	0.827	5340400000	126.4	1	0.841	0.746	0.854
LKP 198197	100.5	100.5	No	85.4	0.22	2792	3.6	0.595	0.347	0.063	0.978	45.62	0.846	7226208000	158.4	0.998	0.901	0.73	0.869
LKP 198205	158.47	158.47	No	94.4	0.46	2300	3.8	0.86	0.139	0.001	0.942	97.83	0.867	12913560000	132	1	0.862	0.873	0.866
LKP 198208	196.09	196.09	No	34.9	0.26	1610	2.5	0.797	0.189	0.009	0.992	201.55	0.972	6630995000	32.9	1	0.986	0.889	1.08
LKP 198231	116.77	116.77	No	66.1	0.23	1860	2.8	0.84	0.29	0.014	0.988	134.36	0.883	6798620000	50.6	0.999	0.938	0.753	0.758
LKP 198248	109.28	109.28	No	60.1	0.35	1936	3	0.692	0.299	0.007	0.957	128.78	0.897	5872368000	45.6	1	1.007	0.582	1.41
LKP 198342	100.94	100.94	No	74.5	0.22	1993	2.8	0.593	0.287	0.115	0.994	122.22	0.873	6538770000	53.5	1	0.877	0.851	0.872
LKP 198693	192.67	192.67	No	39.3	0.18	1845	2.1	0.724	0.268	0.005	0.96	193.26	0.936	7034660000	36.4	0.997	0.948	0.884	0.936	0.4351	0.926	0.4592	0.943	0.9635	0.961	0.799	0.996	0.554	41.27	0.12	0.4592	0.84	0.65	0.92		0.9756
LKP 198760	94.18	94.18	No	66.35	0.22	3230	0.7	0.71	0.277	0.006	0.986	153.5	0.851	4390100000	28.6	0.994	0.986	0.578	0.68	0.3974	0.873	0.4232	0.957	0.9506	0.9255	0.975	0.99	1.329	35.28	0.038	0.4232	0.72	0.67	0.94		0.9359
LKP 198898	211.4	211.4	No	64.45	0.36	2922	3.35	0.7575	0.238	0.002	0.9785	215.15	0.875	12822940000	59.6	0.994	0.853	0.941	0.875	0.5503	0.927	0.5456	0.9432	0.9416	0.9406	0.917	0.994	0.424	39.37	0.038	0.5456	0.93	0.7684	0.92	0.7	0.9175
LKP 199758	57.56	57.56	No	76.62	0.38	2046	3.7	0.7598	0.2352	0.002	0.9485	43.23	0.923	4063620000	94	1	0.964	0.788	0.461	0.598	0.962	0.61	0.9917	0.9842	0.9958	0.898	0.973	0.1	18.46	0.01	0.61	0.89	0.75	0.95		0.9791
LKP 199853	103.97	103.97	No	69.2	0.37	3219	3.3	0.748	0.247	0.001	0.97	120.75	0.894	6423900000	53.2	0.996	0.979	0.619	1.788	0.5106	0.87	0.4564	0.9843	0.9801	0.9435	0.591	0.989	0.259	25.41	0.122	0.4564	0.98	0.86	0.86		0.7835
LKP 199882	118.54	118.54	No	55.9	0.22	1958	2.5	0.751	0.227	0.019	0.961	96.52	0.951	6302700000	65.2994	0.995	0.94	0.972	0.801	0.518	0.879	0.5027	0.8648	0.8621	0.9873	0.854	0.995	0.89	37.42	0.15	0.5027	0.98	0.65	0.82		0.8273
LKP 200579	82	82	No	62.2	0.29	1337	2.5	0.767	0.157	0.076	0.9395	82	0.9227	4698600000	57.3	0.9888	0.93	0.946	0.801	0.5003	0.86	0.5574	0.9322	0.9268	0.9483	0.966	0.9941			0.017	0.5574	0.7422	0.7528	0.937		0.9649
LKP 200592	120	120	No	40.2	0.22	1549	2	0.845	0.128	0.027	0.983	120	0.8703	4188000000	34.9	0.9968	0.871	0.891	0.774	0.4814	0.6602	0.2494	0.8771	0.9022	0.9022	0.9649	0.997			0.021	0.2494	0.8895	0.2433	0.953		0.9723
LKP 200643	82	82	No	73.3	0.3	1497	2.8	0.78	0.156	0.064	0.9397	72	0.8528	5112000000	71	0.98	0.899	0.789	0.481	0.3536	0.7533	0.3796	0.9224	0.8664	0.9287	0.908	0.9845			0.021	0.3796	0.6989	0.6725	0.744		0.7816
LKP 200895	198	198	No	32.2	0.18	1046	1.9	0.807	0.169	0.013	0.972	104	0.9294	5907200000	56.8	0.994	0.911	1.054	0.643	0.6529	0.88	0.7066	0.9343	0.959	0.9243	0.921	0.989	0.54	27.79	0.048	0.7066	0.672	0.796	0.869		0.946
LKP 200897	194	194	No	43.6	0.18	1761	1.9	0.787	0.203	0.003	0.971	186	0.9499	8016600000	43.1	1	1.002	0.721	0.633	0.5371	0.899	0.5134	0.9661	0.9678	0.9128	0.972	0.997	0.603	38.704	0.018	0.5134	0.955	0.833	0.895		0.851
LKP 2922	132.51	132.51	No	68.6	0.35	340	4.1	0.719	0.268	0.006	0.9113	122.68	0.865	7851520000	64	1	0.9	0.77	0.72	0.5582	0.736	0.5876	0.9458	0.9689	0.9261	0.981	0.994	0.48	5.56	0.01	0.5876	0.67	0.63	0.74		0.77
LKP 3032	107.3	107.3	No	51.9	0.67	1907	6.9	0.616	0.327	0.053	0.969	128.95	0.947	5261160000	40.8	0.99	0.936	0.981	0.875	0.4882	0.949	0.5348	0.9946	0.9947	0.9941	0.989	0.989	9.19	35.64	0.102	0.5348	0.95	0.86	0.76		0.7687
LKP 310	196.73	196.73	No	25	0.29	914	1.3	0.513	0.45	0.037	0.9707	180.86	0.9489	4648102000	25.7	0.9436	0.928	0.991	0.59	0.1841	0.792	0.226		0.9832	0.9759	0.865	0.981			0.095	0.226					0.9853
LKP 4024*	183.56	183.56	No	92.3	0.89	928	9.4	0.769	0.212	0.016	0.936	95.92	0.869	14694944000	153.2	1	1.044	0.453	0.805
LKP 4043*	196.27	196.27	No	90.2	0.78	724	8.6	0.799	0.192	0.008	0.944	182.25	0.943	16621200000	91.2	1	0.934	0.953	0.943
LKP 4044*	186.46	186.46	No	58.3	1.03	481	9.5	0.747	0.23	0.017	0.962	203.56	0.87	9424828000	46.3	1	0.908	0.715	0.819
LKP 478	105.4	105.4	No	43.2	0.2	4478	2	0.614	0.329	0.05	0.9816	121.16	0.81	3671148000	30.3	0.9967	0.821	0.794	0.777	0.4399	0.8723	0.4568	0.9567	0.9421	0.879	0.9152	0.9908			0.081	0.4568	0.6786	0.8689	0.7966		0.9066
LKP 5398	206.35	206.35	No	114.6		603		0.71	0.235	0.05	0.958	200.89	0.847	19968466000	99.4	1	0.851	0.822	0.814
LKP 5421	221.7	221.7	No	41.1	0.19	1979	2.1	0.61	0.38	0.006	0.992	204.18	0.896	8126364000	39.8	0.99	0.965	0.776	0.747
LKP 5545	217.9	217.9	Autoscaled	72.8	0.32	1153	3.1	0.7275	0.228	0.04	0.88	92.42	0.77	12180956000	131.8	0.998	0.754	0.797	0.828
LKP 5565	167.08	167.08	No	54.6	0.21	1704	2.6	0.72	0.263	0.01	0.994	170.33	0.93	8448368000	49.6	0.995	0.997	0.725	0.837
LKP 5740	95	95	No	68	0.38	3470	3.2	0.746	0.247	0.003	0.986	125.21	0.866	5584366000	44.6	0.999	0.908	0.733	0.866
LKP 5779	89.69	89.69	No	56.1	0.26	24	2.6	0.577	0.384	0.031	0.993	119.82	0.991	4984512000	41.6	1	1.068	0.849	0.892
LKP 5825	121.98	121.98	No	43.9	0.3	1629	2.8	0.76	0.205	0.03	0.974	127.99	0.946	5068000000	39.5968	0.995	0.955	0.0986	0.0152
LKP 5878	192.99	192.99	No	40	0.4	3370	4	0.757	0.243	0	0.996	188.61	0.855	6676794000	35.4	0.987	0.919	0.691	0
LKP 5897	184.91	184.91	No	68	0.6	3820	4	0.725	0.259	0.014	0.968	97.28	0.753	9047000000	92.9996	1	0.764	0.812	0.746
LKP 6025	164.1	164.1	No	58.6	0.36	2434	3	0.887	0.047	0.066	0.9743	113.08	0.924	8854164000	78.3	0.995	0.76	2.65	1.89	0.2112	0.8036	0.2376	0.9811	0.9759	0.9648	0.9474	0.9952	0.4	43.7	0.03	0.2376	0.769	0.93	0.812		0.906
LKP 6027	135.26	135.26	No	34.6	0.2	1750	1.8	0.838	0.149	0.013	0.9658	28.78	0.957	4455144000	154.8	1	0.8	1.46	5.67	0.4805	0.7161	0.475	0.9854	0.9835	0.97	0.9923	0.9993	1.06	141.29	0.01	0.475	0.662	0.811	0.703		0.711
LKP 6035	164.1	164.1	No	51.6	0.66	4626	4.5	0.559	0.423	0.01	0.944	57.7	0.907	7633883000	132.303	0.996	0.82	0.583	20.156	0.1724	0.8435	0.1484	0.9741	0.9919	0.9799	0.9198	0.9877	0.57	174.64	0.05	0.1484	0.948	0.903	0.77		0.768
LKP 6049	103.82	103.82	No	48	0.26	2668	2.8	0.557	0.255	0.178	0.9901	126.44	0.862	4277300000	33.8287	0.999	0.89	0.813	0.839
LKP 6053	150.28	150.28	No	73	0.2	1980	2	0.668	0.297	0.025	0.9777	100.18	0.959	10378648000	103.6	1	0.95	0.95	1.04	0.319	0.876	0.32	0.7558	0.972	0.9778	0.98	0.999	0.084	28.52	0.002	0.32	0.97	0.72	0.88		0.88
LKP 6061	78.98	78.98	No	55.5	0.45	5455	3	0.581	0.389	0.008	1	39.42	0.921	4001130000	101.5	0.996	0.86	1.04	1.27
LKP 6065	114.04	114.04	No	35.5	0.25	2655	2.5	0.728	0.237	0.013	1	164.69	0.899	3590242000	21.8	0.999	0.88	1.01	0.48
LKP 6071	156.8	156.8	No	75	0.3	2755	3.5	0.752	0.212	0.028	0.9151	46.17	0.871	10180500000	220.5	1	0.78	1.2	0.9	0.4479	0.914	0.4775	0.9626	0.9639	0.9877	0.985	0.998	0.47	37.74	0.01	0.4775	0.91	0.68	0.93		0.98
LKP 6076	199.47	199.47	No	36.3	0.45	4065	4.5	0.737	0.249	0.004	0.9601	40.7	0.952	6837600000	168	1	0.89	1.14	1.19
LKP 6092	208.98	208.98	No	31.6	0.2	1785	1.9	0.607	0.245	0.139	0.9825	48.3	0.98	6448050000	133.5	1	1.09	0.76	0.87
LKP 6097	122.4	122.4	No	64	0.3	2662	3.2	0.705	0.28	0.008	0.985	43.18	0.769	5984748000	138.6	1	0.76	0.784	0.863
LKP 6106	182.88	182.88	No	67.5	0.3	2196	3	0.777	0.2	0.014	0.9524	42.17	0.949	11660005000	276.5	1	0.98	0.83	0.81
LKP 6114	200.9	200.9	No	32.4	0.25	1727	2.4	0.481	0.332	0.165	0.9912	40.08	0.988	6412800000	160	1	1.01	0.98	0.94	0.1422	0.82	0.1532	0.9951	0.9904	0.9938	0.976	0.996	0.25	43.68	0.01	0.1532	0.89	0.83	0.82		0.88
LKP 6120	78.19	78.19	No	34.5	0.16	2098	1.6	0.8475	0.133	0.0105	0.9097	46.51	0.82	2199923000	47.3	1	0.83	0.76	1.02
LKP 6126	201.1	201.1	No	34.5	0.25	2502	2.7	0.681	0.258	0.058	0.9174	48.2	0.916	6338300000	131.5	1	0.957	0.795	0.869
LKP 6142	206.58	206.58	No	33.2	0.27	1733	2.3	0.545	0.44	0.007	0.9836	43.06	0.943	6932660000	161	1	0.99	1.03	1.3
LKP 6178	198.4	198.4	No	27.7	0.21	1925	1.8	0.674	0.321	0.002	1	192.17	0.828	4535212000	23.6	1	0.834	0.805	1.656
LKP 6189	198.64	198.64	No	28.4	0.18	1691	1.8	0.594	0.279	0.119	0.8057	38.24	0.728	4091680000	107	0.991	0.723	0.704	0.71
LKP 6199	105.02	105.02	No	34.4	0.17	1180	1.9	0.646	0.295	0.056	0.9549	91.5	0.917	3303150000	36.1	1	0.933	0.845	1.015
LKP 6207	109.3	109.3	No	36.1	0.28		2.7	0.587	0.399	0.012	0.963	79.02	0.837	3295130000	41.6999	0.989	0.836	0.816	1.047	0.2532	0.755	0.2891	0.9563	0.9736	0.9689						0.2891	0.59	0.81	0.72		0.7553
LKP 6234	202.39	202.39	Autoscaled	39.5	0.23	1411	2.2	0.401	0.153	0.443	0.958	59.89	0.955	7618010000	127.2	1	0.939	0.905	0.981	0.3239		0.3222	0.9848	0.9851	0.9745						0.3222
LKP 6706	201.37	201.37	No	31.3	0.2	1300	2.1	0.383	0.489	0.12	1	208.96	0.891	5579232000	26.7	1	0.989	0.8	0.884
LKP 7290	171.89	171.89	No	45.5	0.25	3295	3	0.556	0.426	0.0105	0.962	40.84	0.882	6899918000	168.95	0.996	1.049	0.64	1.092
LKP 7319	185.85	185.85	No	67.6	0.28	2031	3.1	0.582	0.3945	0.0195	0.922	96.71	0.916	11508000000	118.995	0.994	1.001	0.784	0.799
LKP 7323	190.2	190.2	No	65.2	0.3	2990	3	0.578	0.3485	0.0675	0.983	222.26	0.91	11290000000	50.7964	0.982	1.04	0.716	0.769
LKP 7328	107.71	107.71	No	78.5	0.3	3052	3.2	0.7235	0.2625	0.006	0.995	40.71	0.897	7582000000	186.244	0.993	0.719	0.752	0.709
LKP 7360	51.53	51.53	No	55	0.3	1955	3	0.6945	0.1395	0.0335	0.974	76.27	0.855	2423000000	31.7687	0.997	0.881	1.07	0.702
LKP 7390	150.17	150.17	No	54	0.2	1975	2.5	0.764	0.22	0.0095	0.9469	151.73	0.861	6979580000	46	1	0.976	0.423	0.906
LKP 741	202.26	202.26	No	52.9	0.34	1427	3	0.793	0.157	0.05	0.934	210.2	0.866	9249128000	44.0016	0.975	0.858	0.939	0.767		0.972			0.9936	0.9821	0.9629	0.9375			0.229						0.882
LKP 76723	180	180	No	87.6	0.45	2680	3.8	0.811	0.128	0.061	0.822	204	0.8095	12750000000	62.5	0.9941	0.808	1.088	0.173	0.6259	0.79	0.6259	0.9162	0.9282	0.941	0.881	0.987			0.006	0.6259	0.691	0.794	0.79		0.809
LKP 8428	175.41	175.41	No	49	0.42	3303	3.4	0.503	0.484	0.009	0.963	42.77	0.832	7249000000	169.488	0.982	0.919	0.725	0.795
LKP 8491	125.5	125.5	No	112.1	0.3	2335	3.5	0.756	0.121	0.007	0.994	47.08	0.995	7438000000	157.986	0.986	1.053	1.523	1.281
LKP 85778	117.93	117.93	No	50	0.25	1405	2.5	0.729	0.15	0.117	0.993	134.98	0.987	5763650000	42.7	1	1.004	0.935	0.028	0.4836	0.912	0.5097	0.9354	0.9385	0.9207	0.886	0.993	0.198	24.2	0.025	0.5097	0.76	0.8117	0.97		0.961
LKP 86340B	240.31	240.31	No	94.2	0.3	3080	3.5	0.631	0.207	0.16	0.977	179.99	0.82	18510000000	102.839
LKP 86347B	223.3	223.3	No	63.34		2290					0.994	43.97	0.782	5940000000	135.092	1
LKP 8766	181.61	181.61	No	37.5	0.23	1763.5	2.6	0.7285	0.241	0.0255	0.921	106.9	0.862	5858120000	54.8	0.997	0.852	0.87	0.981	0.5274	0.904	0.5113	0.973	0.9494	0.9592	0.968	0.994	0.138	34.51	0.005	0.5113	0.95	0.82	0.9		0.8747
LKP 8773	192.5	192.5	No	45.2	0.21	1979	2.3	0.683	0.236	0.076	0.977	177.54	0.82	7119350000	40.1	0.994	0.882	0.639	0.788	0.5679	0.802	0.5901	0.972	0.9836	0.9528		0.989			0.224	0.5901	0.7	0.88	0.8		0.8343
LKP 8779	92.38	92.38	No	26.55	0.278	1767.5	2.35	0.7023	0.293	0.0015	1	45.36	0.821	2004910000	44.2	0.988	0.877	0.669	2.188	0.4889	0.796	0.4954	0.9571	0.9867	0.978	0.955	0.986	4.516	38.65	0.258	0.4954	0.68	0.95	0.83		0.8181
LKP 8789	118.14	118.14	No	51.3	0.21	2202.5	2.2	0.679	0.286	0.031	0.953	98.19	0.917	5557550000	56.6	0.999	0.944	0.821	1.006	0.4236	0.88	0.4273	0.9801	0.9687	0.9798	0.921	0.996	0.31	46.08	0.03	0.4273	0.88	0.84	0.88		0.889
LKP 8796	164.58	164.58	Autoscaled	38.4	0.335	1995	2.95	0.547	0.438	0.007	0.901	96.54	0.825	5213160000	54	0.999	0.915	0.691	1.223	0.3372	0.735	0.3254	0.9246	0.8873	0.9624		0.994		40.54		0.3254	0.77	0.63	0.7		0.7061
LKP 8800	118.47	118.47	No	55.817	0.55	3332	3.93	0.4606	0.5305	0.0045	0.94	41.5	0.83	5486300000	132.2	0.998		0.798	0.922	0.1756	0.808	0.1653	0.8788	0.8012	0.9722	0.9	0.996	0.24	46.11	0.03	0.1653	0.76	0.73	0.75		0.7534
LKP 8807	128.6	128.6	Autoscaled	51.44	0.24	2370	2.73	0.719	0.2354	0.0399	0.929	101.73	0.847	5590060000	54.95	0.997	0.864	0.777	0.913	0.4728	0.871	0.4605	0.9867	0.9908	0.9826	0.777	0.996	0.216	45.53	0.055	0.4605	0.92	0.85	0.84		0.8483
LKP 8826	98.15	98.15	No	57.2	0.19	1647	2.2	0.712	0.248	0.037	0.96	116.81	0.85	4777530000	40.9	1	0.912	0.634	0.896	0.5895	0.874	0.6107	0.9623	0.963	0.9664	0.805	0.997	0.233	43.22	0.052	0.6107	0.82	0.79	0.89		0.904
LKP 88410	158.62	158.62	No	69.7	0.32	3818	3	0.664	0.324	0.004	0.977	160.18	0.92	10091340000	63	1	1.4	0.787	0.729
LKP 8859	100.97	100.97	No	62.85	0.33	2601	2.7	0.8185	0.1565	0.025	0.947	98.43	0.893	5640040000	57.3	0.988	0.841	1.153	0.964	0.2836	0.907	0.2908	0.9662	0.9706	0.9435	0.94	0.997	1.546	89.71	0.108	0.2908	0.86	0.48	0.91		0.9295
LKP 8877	209.81	209.81	No	51.8	0.27	1424	2.8	0.682	0.292	0.024	0.909	201.22	0.822	8914050000	44.3	0.989	0.875	0.691	0.753	0.6055	0.803	0.6872	0.9759	0.9804	0.9821						0.6872	0.52	0.95	0.89		0.9145
LKP 8882	165.8	165.8	No	48.13	0.14	1739.67	1.3	0.6407	0.32	0.0313	0.935	41.36	0.885	7051880000	170.5	0.996	0.929	0.794	0.735	0.4792	0.741	0.4546	0.9973	0.9967	0.9987	0.974	0.997	0.707	24.65	0.025	0.4546	0.79	0.68	0.7		0.7034
LKP 8885	205.98	205.98	No	32.2	0.18	2470	1.6	0.638	0.356	0.002	0.969	211.44	0.824	5434020000	25.7001	0.991	0.915	0.635	0.412	0.4039	0.904	0.4354	0.9425	0.9439	0.9529	0.862	0.991	0.912	63.12	0.14	0.4354	0.92	0.6045	0.95		0.968
LKP 8889	92.75	92.75	No	41.33	0.18	2215	1.87	0.613	0.3363	0.038	0.937	97.64	0.789	3017080000	30.9	0.984	0.84	0.694	0.706	0.4514	0.809	0.4702	0.978	0.9794	0.9782	0.893	0.985	0.655	51.46	0.087	0.4702	0.81	0.6802	0.83		0.8454
LKP 9291	97.84	97.84	No	72.2	0.32	2310	1.9	0.664	0.279	0.051	0.962	102.9	0.78	5494860000	53.4	0.984	0.789	0.47	0.795	0.4538	0.742	0.5025	0.947	0.9653	0.9563	0.945	0.983	1.092	18.89	0.081	0.5025	0.59	0.6038	0.74		0.8254
LKP 9307	165.95	165.95	No	56.5	0.2	1485	4	0.723	0.216	0.052	0.9642	196.33	0.739	6871550000	35	0.996	0.761	0.637	0.825	0.5203	0.903	0.5195	0.944	0.9413	0.9739	0.918	0.994	0.297	36.44	0.027	0.5195	0.89	0.9542	0.91	0.99	0.8989
LKP 9320	180.29	180.29	No	49.4	0.22	2400	2.35	0.498	0.467	0.0265	0.9738	193.27	0.926	8233302000	42.6	1	1.118	0.666	0.874	0.2152	0.849	0.2047	0.965	0.963	0.9498	0.97	0.998	0.895	45.87	0.032	0.2047	0.88	1.0128	0.76	0.87	0.8088
LKP 9323	181.64	181.64	No	39.3	0.33	3654	2.6	0.584	0.406	0.004	0.9892	180	0.892	6354000000	35.3	1	0.981	0.743	0.892
LKP 9330	171.59	171.59	No	39.38	0.23	2637.5	0.6	0.6725	0.2945	0.0195	0.9694	42.93	0.892	6010200000	140	1	0.919	0.839	0.823
LKP 9336	177.49	177.49	No	88.7	0.5	3113.33	4.4	0.535	0.438	0.014	0.9815	180.58	0.838	13182340000	73	0.999	0.993	0.618	0.778	0.3872	0.812	0.4274	0.9731	0.9774	0.975	0.87	0.992	0.226	27.56	0.036	0.4274	0.69	0.9926	0.89	0.92	0.897
LKP 9354	134.56	134.56	No	61.25	0.39	4580	3.3	0.6285	0.337	0.0275	0.959	43.8	0.83	6832800000	156	0.996	0.82	0.833	0.966	0.3248	0.87	0.3008	0.9477	0.9544	0.9386	0.923	0.989	0.356	51.7	0.032	0.3008	0.95	0.8615	0.8	0.9	0.8106
LKP 9440	76.82	76.82	No	34.15	0.23	2362	2	0.486	0.461	0.0375	1	104.32	0.897	2347200000	22.5	0.997	0.973	0.831	0.838
LKP 9971	166.97	166.97	No	74.7	0.31	1624	3.4	0.637	0.262	0.091	0.986	175.89	0.864	10746879000	61.1	1	0.913	0.696	0.902
LKP 9335	174.8	151.8	Aborted	42	0.26	1990	2.5	0.416	0.416	0.16	0.971	54.58	0.798449	5861892000	107.4	0.985	0.84149	0.723616	0.82322	0.3486	0.798947	0.1246	0.892	0.9058	0.9122	0.839342	0.981763	0.316	38.03	0.063	0.1246	0.98	0.9053	0.88	0.88	0.9707
LKP 9360	200	175.3	Aborted	91.45	0.47	3895	4.1	0.6615	0.3085	0.019	0.943	177.34	0.824	15073900000	85	0.973	0.834791	0.793979	0.779834	0.4799	0.758173	0.4823	0.8155	0.8782	0.8762	0.787887	0.980717	0.113	35.95	0.032	0.4823	0.83	0.886	0.86	0.3944	0.8685
Average	149.656	149.294		59.5528	0.360527	2198.37	2.96845	0.682266	0.270294	0.040174	0.965943	119.65	0.876922	7.37021e+09	77.446	0.994803	0.910165	0.808704	1.19229	0.425439	0.858323	0.436344	0.948723	0.9571	0.956235	0.909387	0.988406	0.888778	45.009	0.0684483	0.436344	0.836017	0.765568	0.852778	0.816255	0.874211
STDEV	50.1809	50.1376		24.836	0.864501	865.473	1.41363	0.0939151	0.0806213	0.0638806	0.0295305	56.3698	0.0643039	3.16804e+09	48.6445	0.011148	0.0931033	0.261121	2.90679	0.150138	0.0768518	0.147463	0.0502426	0.0322015	0.031051	0.0759285	0.0133329	1.75274	37.3102	0.0575529	0.147463	0.143921	0.173393	0.0737504	0.204222	0.0858515

## Sheet: DLD vs. Ficoll comparison
	Input								Ficoll											DLD
Sample ID	Average of CC Input WBC (e6/mL)	Average of CC Input RBC (e6/uL)	Average of CC Input PLT (e6/mL)	Average of CC Input % Lymph	Average of CC Input % MoNo	Average of CC Input % Gran	Average of FACS Input RBC/WBC (235+/45+)	Average of FACS Input PLT/WBC (41+/45+)	Average of Net Volume Processed (mL)	Average of CC % WBC Recovery	Average of CC Product % PLT Depletion	Average of % CD3+ Recovery	Average of FACS Product % RBC Depletion	Average of FACS Product RBC/WBC (235+/45+)	Average of FACS Product PLT/WBC (41+/45+)	Average of Fold D3	Average of Fold D6	Average of Fold D12	Average of FACS % CD45+ Recovery	Average of Net Volume Processed (mL)	Average of CC % WBC Recovery	Average of CC Product % PLT Depletion	Average of % CD3+ Recovery	Average of FACS Product % RBC Depletion	Average of FACS Product RBC/WBC (235+/45+)	Average of FACS Product PLT/WBC (41+/45+)	Average of Fold D3	Average of Fold D6	Average of Fold D12	Average of FACS % CD45+ Recovery
LKP 0322	33.4	0.3	2170	0.535	0.433	0.027			80	0.6151	0.7769	0.517	0.872	0.105	10.484	1.73	2.57	3.4	0.596	58.4	0.8638	0.9978	0.995	0.9547	0.079	0.816	1.14	1.74	3.08	0.9756
LKP 0341	52.3	0.27	1984	0.652	0.259	0.089			30	0.3835	0.9659	0.423	0.832	0.018	0.245	1.17	4.53	12.22	0.335	186.94	0.9708	0.9928	0.9	0.891	0.018	0.245	1.13	6.71	22.7	0.918
LKP 0359	43.3	0.23	1244	0.711	0.156	0.133			44	0.6247	0.9186	0.54	0.941	0.111	4.291	1.5	2.94	10	0.474	174	0.9254	0.9915	0.948	0.863	0.113	0.254	1.25	2.53	9.51	0.902
LKP 0381	36.4	0.32	2010	0.527	0.417	0.044			36	0.4458	0.9486	0.322	0.893	0.4	5.85	1.81	2.74	4.64	0.36	182	0.9621	0.9901	0.964	0.889	0.26	1.07	1.03	2.29	6.5	0.958
LKP 0394	37.5	0.27	1278	0.774	0.186	0.04	3.04	51.82	19	0.5935	0.8962	0.66	0.906	0.44	4.75	1.01	4.41	12.8	0.634	148	0.9304	0.9974	0.973	0.978	0.07	0.15	1.44	5.62	35.01	0.95
LKP 0395	45.7	0.27	1700	0.739	0.12	0.141	1.75	56.78	19	0.6746	0.8591	0.559	0.774	0.28	5.96	0.64	2.16	9.35	0.658	192	0.8587	0.9923	0.893	0.96	0.08	0.33	0.66	2.34	15.94	0.887
LKP 0415	42	0.28	1740	0.837	0.128	0.035	1.588	103.238	34	0.7002	0.8652	0.566	0.591	0.58	12.31	0.81	3.81	17.68	0.611	189	0.8152	0.9922	0.682	0.921	0.15	0.5	1.66	3.6	19.43	0.789
LKP 109956B	80	0.36	2922	0.718	0.216	0.064			19.5	0.6492	0.9355									150.9	0.829	1
LKP 109962B	57.6	0.16	2466	0.482	0.293	0.22			19.5	0.6581	0.9389									164.32	0.889	0.987
LKP 109966B	69.3	0.19	1804	0.701	0.29	0.005			25.4	0.1265	0.9645									199.62	0.923	0.996
LKP 109968B	46.5	0.4	1906	0.674	0.314	0.008			22.5	0.4524	0.9418									220.63	0.911	0.994
LKP 110123	127	0.3	1950	0.537	0.317	0.141			10	0.7344	0.8053									102.86	0.616	1
LKP 1177	101	0.3	2160	0.81	0.17	0.014			16	0.6218	0.9474									163.32	0.816	0.985
LKP 1219	32	0.1	1840	0.759	0.202	0.036			15	0.5677	0.9467									182.19	0.983	1
LKP 1425	41.5	0.33	1773	0.703	0.278	0.017			25	0.434	0.932	0.2564	0.9679	0.163	7.845				0.28	76	0.9685	0.9925	0.9841	0.825	0.165	2.127				0.8616
LKP 184592	168	0.45	1720	0.6985	0.249	0.0425	0.171	12.91	19.5	0.117	0.9988	0.2504	0.824	0.123	0.54	0.89	3.17	13.72	0.172	84.1	0.86	1	0.9275	0.984	0.002	0.11	0.83	5.21	17.2	0.926
LKP 184708	42.5	0.3	1875	0.658	0.328	0.007	0.731	42.99	9.6	0.6143	0.9415	0.5408	0.768	0.035	5.98	1.74	3.68	4.77	0.608	110.45	0.915	0.95	0.9653	0.854	0.111	1.39	1.11	3.08	6.35	0.964
LKP 184843	98.4	0.29	2322	0.7485	0.2315	0.013			19.2	0.6235	0.9106									180.66	0.93	1
LKP 184851	67.3	0.33	2172	0.7785	0.216	0.002			21.4	0.6081	0.9287									205.69	0.905	1
LKP 184967	63.2	0.3	2696.67	0.6315	0.3215	0.034	0.5	44.07	95	0.4096	0.9582	0.3935	0.905	0.07	3.28				0.523	145.1	0.822	0.914	0.7835	0.858	0.09	3.49				0.8
LKP 185047	62.6	0.3	2012	0.671	0.303	0.022			18.8	0.526	0.952									150.93	0.933	1
LKP 185118	71.1	0.19	1779	0.757	0.229	0.011			19.3	0.5961	0.924									105.75	0.869	0.991
LKP 185145	83.5	0.24	2444	0.6485	0.3075	0.035			10.4	0.7646	0.8655									132.02	0.872	1
LKP 185227	87.45	0.265	2924	0.766	0.224	0.0065			5	0.6435	0.9007									58.64	0.81	1
LKP 185355	47.2	0.32	2790	0.683	0.306	0.003			19.8	0.6432	0.9457									201.2	0.919	1
LKP 193249	52.4	0.28	3002	0.741	0.245	0.007			9.5	0.636	0.7431									122.46	0.8715	0.995
LKP 194416	132.16	0.35	2573	0.71	0.2622	0.0246			10	0.6657	0.8444									83.84	0.86	1
LKP 194467	123	0.45	2450	0.734	0.241	0.02			15	0.5296	0.9349									65	0.888	0.998
LKP 194570	74.54	0.23	2107	0.5767	0.29	0.123			15	0.681	0.1551									156.4	0.748	0.995
LKP 197249	55.2	0.16	1625	0.774	0.188	0.026	0.427	25.35	10.5	0.756	0.9006	0.7504	0.832	0.062	1.8				0.797	90.3	0.863	0.998	0.8994	0.853	0.069	0.14				0.909
LKP 197912	45.9	0.35	3300	0.6855	0.2745	0.0195	0.298	72.03	20	0.523	1	0.5313	0.854	0.06	4.37				0.613	150.33	0.969	0.998	0.9101	0.937	0.021	0.51				0.917
LKP 197937	46.88	0.19	2267.5	0.684	0.303	0.0075	0.409	33.42	25.9	0.6711	0.9033	0.6157	0.79	0.065	4.15				0.7	48.83	0.803	0.995	0.8482	0.941	0.03	0.18				0.799
LKP 198208	34.9	0.26	1610	0.797	0.189	0.009			21.7	0.571	0.9525									196.09	0.972	1
LKP 198231	66.1	0.23	1860	0.84	0.29	0.014			19.3	0.6317	0.9216									116.77	0.883	0.999
LKP 198342	74.5	0.22	1993	0.593	0.287	0.115			9.5	0.3251	0.9186									100.94	0.873	1
LKP 198693	39.3	0.18	1845	0.724	0.268	0.005	0.554	41.27	19.8	0.6301	0.9121	0.5338	0.869	0.082	4.99	1.06	1.49	3.76	0.608	192.67	0.936	0.997	0.9756	0.799	0.12	0.16	1.02	2.17	6.48	0.926
LKP 198760	66.35	0.22	3230	0.71	0.277	0.006	1.329	35.28	10.5	0.7709	0.8809	0.7655	0.93	0.059	4.03	0.47	2.26	3.95	0.782	94.18	0.851	0.994	0.9359	0.975	0.038	0.42	0.38	2.16	4.64	0.873
LKP 198898	64.45	0.36	2922	0.7575	0.238	0.002	0.424	39.37	22	0.748	0.9003	0.5702	0.764	0.157	4.98				0.682	211.4	0.875	0.994	0.9175	0.917	0.038	0.25				0.927
LKP 199853	69.2	0.37	3219	0.748	0.247	0.001	0.259	25.41	19	0.5845	0.9094	0.6077	0.833	0.053	4.66				0.481	103.97	0.894	0.996	0.7835	0.591	0.122	0.31				0.87
LKP 199882	55.9	0.22	1958	0.751	0.227	0.019	0.89	37.42	9.5	0.5211	0.8628	0.5429	0.735	0.2	11.42	0.9	2.11	6.08	0.499	118.54	0.951	0.995	0.8273	0.854	0.15	0.21	0.9	2.23	7.1	0.879
LKP 200579	62.2	0.29	1337	0.767	0.157	0.076			7.5	0.4342	0.8919	0.416	0.931	0.057	5.803	1.43	4.69	16.64	0.563	82	0.9227	0.9888	0.9649	0.966	0.017	0.186	1.24	4.14	16.74	0.86
LKP 200592	40.2	0.22	1549	0.845	0.128	0.027			44	0.3422	0.9522	0.4282	0.8315	0.21	7.7845	1.7	3.9	35.68	0.298	120	0.8703	0.9968	0.9723	0.9649	0.021	0.221	1.7	3.89	33.74	0.6602
LKP 200643	73.3	0.3	1497	0.78	0.156	0.064			30	0.4676	0.9319	0.1826	0.995	0.002	2.72	0.99	2.67		0.235	82	0.8528	0.98	0.7816	0.908	0.021	0.439	1.08	3.34	10.39	0.7533
LKP 200895	32.2	0.18	1046	0.807	0.169	0.013	0.54	27.79	19	0.6623	0.8966	0.618	0.749	0.416	4.837	0.71	5.71	23.04	0.565	198	0.9294	0.994	0.946	0.921	0.048	0.342	0.94	5.96	20.21	0.88
LKP 200897	43.6	0.18	1761	0.787	0.203	0.003	0.603	38.704	19	0.5398	0.8964	0.383	0.502	0.452	14.763	0.74	6.53	28.21	0.43	194	0.9499	1	0.851	0.972	0.018	0.198	0.84	7.54	33.53	0.899
LKP 2922	68.6	0.35	340	0.719	0.268	0.006	0.48	5.56	6	0.5053	0.9935	0.44	0.986	0.02	0.2				0.471	132.51	0.865	1	0.77	0.981	0.01	0.04				0.736
LKP 478	43.2	0.2	4478	0.614	0.329	0.05			120	0.529	0.935	0.4191	0.8229	0.17	5.309	1.01	2.6	11.88	0.3484	105.4	0.81	0.9967	0.9066	0.9152	0.081	0.597	1.84	3.95	16.38	0.8723
LKP 5740	68	0.38	3470	0.746	0.247	0.003			15	0.5654	0.9252									95	0.866	0.999
LKP 5779	56.1	0.26	24	0.577	0.384	0.031			21	0.5176	0.8181									89.69	0.991	1
LKP 5825	43.9	0.3	1629	0.76	0.205	0.03			40	0.5446	1									121.98	0.946	0.995
LKP 5878	40	0.4	3370	0.757	0.243	0			14	0.5952	0.9421									192.99	0.855	0.987
LKP 5897	68	0.6	3820	0.725	0.259	0.014			39	0.7855	0.9257									184.91	0.753	1
LKP 6025	58.6	0.36	2434	0.887	0.047	0.066	0.4	43.7	69.5	0.534	0.8825	0.464	0.85	0.15	5.04				0.42	164.1	0.924	0.995	0.906	0.9474	0.03	0.26				0.8036
LKP 6027	34.6	0.2	1750	0.838	0.149	0.013	1.06	141.29	129.4	0.5868	0.922	0.675	0.78	0.42	1.2				0.59	135.26	0.957	1	0.711	0.9923	0.01	0.13				0.7161
LKP 6035	51.6	0.66	4626	0.559	0.423	0.01	0.57	174.64	80	0.3708	0.941	0.5381	0.42	0.74	44.95				0.59	164.1	0.907	0.996	0.768	0.9198	0.05	2.57				0.8435
LKP 6049	48	0.26	2668	0.557	0.255	0.178			179	0.5729	0.9198									103.82	0.862	0.999
LKP 6053	73	0.2	1980	0.668	0.297	0.025	0.084	28.52	107.5	0.7889	0.7732	0.574	0.56	0.72	6.22				0.55	150.28	0.959	1	0.88	0.98	0.002	0.04				0.876
LKP 6061	55.5	0.45	5455	0.581	0.389	0.008			109	0.1256	0.9763									78.98	0.921	0.996
LKP 6065	35.5	0.25	2655	0.728	0.237	0.013			146	0.412	0.9561									114.04	0.899	0.999
LKP 6071	75	0.3	2755	0.752	0.212	0.028	0.47	37.74	90	0.2087	0.9568	0.1	0.94	0.09	5.14				0.16	156.8	0.871	1	0.98	0.985	0.01	0.05				0.914
LKP 6092	31.6	0.2	1785	0.607	0.245	0.139			6	0.5489	0.9277									208.98	0.98	1
LKP 6106	67.5	0.3	2196	0.777	0.2	0.014			6	0.4492	0.9809									182.88	0.949	1
LKP 6114	32.4	0.25	1727	0.481	0.332	0.165	0.25	43.68	6	0.412	0.9444									200.9	0.988	1	0.88	0.976	0.01	0.17				0.82
LKP 6126	34.5	0.25	2502	0.681	0.258	0.058			10	0.553	0.847									201.1	0.916	1
LKP 6178	27.7	0.21	1925	0.674	0.321	0.002			45	0.4621	0.9476									198.4	0.828	1
LKP 7290	45.5	0.25	3295	0.556	0.426	0.0105			38	0.9521	0.8122									171.89	0.882	0.996
LKP 7360	55	0.3	1955	0.6945	0.1395	0.0335			19	0.9277	0.974									51.53	0.855	0.997
LKP 7390	54	0.2	1975	0.764	0.22	0.0095			18	0.6791	0.8905									150.17	0.861	1
LKP 76723	87.6	0.45	2680	0.811	0.128	0.061			40	0.4247	0.9718	0.25	0.911	0.026	2.174	0.92	1.71	2.87	0.255	180	0.8095	0.9941	0.809	0.881	0.006	0.237	0.74	1.44	2.41	0.79
LKP 8491	112.1	0.3	2335	0.756	0.121	0.007			14	0.619	0.909									125.5	0.995	0.986
LKP 85778	50	0.25	1405	0.729	0.15	0.117	0.198	24.2	23.7	0.6886	0.8852	0.7192	0.76	0.042	3.5	0.93	2.17	5.12	0.725	117.93	0.987	1	0.961	0.886	0.025	0.18	1.04	3.87	6.9	0.912
LKP 8766	37.5	0.23	1763.5	0.7285	0.241	0.0255	0.138	34.51	3.8	0.4369	0.96	0.453	0.852	0.061	2.17				0.484	181.61	0.862	0.997	0.8747	0.968	0.005	0.23				0.904
LKP 8773	45.2	0.21	1979	0.683	0.236	0.076			19.65	0.6379	0.9252	0.5502	0.586	0.073	4.03				0.576	192.5	0.82	0.994	0.8343		0.224	0.51				0.802
LKP 8779	26.55	0.278	1767.5	0.7023	0.293	0.0015	4.516	38.65	5.7	0.5078	0.9587	0.5088	0.746	0.752	3.58				0.66	92.38	0.821	0.988	0.8181	0.955	0.258	0.67				0.796
LKP 8796	38.4	0.335	1995	0.547	0.438	0.007		40.54	10	0.8811	0.8117	0.7093			14				0.602	164.58	0.825	0.999	0.7061			0.31				0.735
LKP 8807	51.44	0.24	2370	0.719	0.2354	0.0399	0.216	45.53	10	0.7938	0.8975	0.7328	0.578	0.125	5.29				0.762	128.6	0.847	0.997	0.8483	0.777	0.055	0.22				0.871
LKP 88410	69.7	0.32	3818	0.664	0.324	0.004			56	0.9886	0.8239									158.62	0.92	1
LKP 9291	72.2	0.32	2310	0.664	0.279	0.051	1.092	18.89	13.8	0.8689	0.8865	0.6991	0.882	0.042	2.16				0.745	97.84	0.78	0.984	0.8254	0.945	0.081	0.44				0.742
LKP 9307	56.5	0.2	1485	0.723	0.216	0.052	0.297	36.44	23.5	0.5619	0.9751	0.599	0.774	0.088	0.96				0.618	165.95	0.739	0.996	0.8989	0.918	0.027	0.26				0.903
LKP 9320	49.4	0.22	2400	0.498	0.467	0.0265	0.895	45.87	19.8	0.7369	0.9193	0.6256	0.966	0.033	4.13				0.681	180.29	0.926	1	0.8088	0.97	0.032	0.1				0.849
LKP 9323	39.3	0.33	3654	0.584	0.406	0.004			19.5	0.5623	0.9596									181.64	0.892	1
LKP 9330	39.38	0.23	2637.5	0.6725	0.2945	0.0195			20.2	0.5607	0.9259									171.59	0.892	1
LKP 9336	88.7	0.5	3113.33	0.535	0.438	0.014	0.226	27.56	21.2	0.5867	0.8759	0.3606	0.854	0.064	5.84				0.516	177.49	0.838	0.999	0.897	0.87	0.036	0.26				0.812
LKP 9354	61.25	0.39	4580	0.6285	0.337	0.0275	0.356	51.7	10.6	0.812	0.8802	0.6759	0.675	0.07	7.59				0.775	134.56	0.83	0.996	0.8106	0.923	0.032	0.67				0.87
LKP 9440	34.15	0.23	2362	0.486	0.461	0.0375			241	0.3552	0.9571									76.82	0.897	0.997
LKP 9335 Duplicate	42	0.26	1990	0.416	0.416	0.16	0.316	38.03	10.5	0.7072	0.907	0.5032	0.781	0.08	4.57				0.744	151.8	0.798449	0.985	0.9707	0.839342	0.063	0.86				0.798947
Average	58.8163	0.287535	2305.72	0.689076	0.26396	0.0396395	0.759909	46.0265	33.6776	0.577208	0.906325	0.511078	0.805564	0.185818	6.08178	1.108	3.2925	11.8847	0.534987	143.347	0.883528	0.994709	0.877627	0.911759	0.0658636	0.507822	1.0985	3.6905	14.712	0.854448
STDEV	25.2379	0.0924994	876.774	0.0975293	0.0880198	0.0474104	0.897511	33.2401	40.6588	0.168264	0.0970644	0.15595	0.132565	0.206968	6.86252	0.403454	1.34634	9.10571	0.168866	45.2444	0.0661753	0.011088	0.0820947	0.0742542	0.0660344	0.676088	0.358686	1.72828	10.3033	0.0724029

## Sheet: Expansion
	Ficoll				DLD				DLD Recovery Corrected				DLD vs. Ficoll
Sample	Average of % CD3+ Recovery	Average of Fold D3	Average of Fold D6	Average of Fold D12	Average of % CD3+ Recovery	Average of Fold D3	Average of Fold D6	Average of Fold D12	D0	Average of Fold D3	Average of Fold D6	Average of Fold D12	D0	D3	D6	D12
LKP 0322	0.517	1.73	2.57	3.4	0.995	1.14	1.74	3.08	1.92456	2.194	3.34874	5.92766	1.92456	1.26821	1.30301	1.74343
LKP 0341	0.423	1.17	4.53	12.22	0.9	1.13	6.71	22.7	2.12766	2.40426	14.2766	48.2979	2.12766	2.05492	3.15157	3.95236
LKP 0359	0.54	1.5	2.94	10	0.948	1.25	2.53	9.51	1.75556	2.19444	4.44156	16.6953	1.75556	1.46296	1.51073	1.66953
LKP 0381	0.322	1.81	2.74	4.64	0.964	1.03	2.29	6.5	2.99379	3.0836	6.85578	19.4596	2.99379	1.70365	2.50211	4.19389
LKP 0394	0.66	1.01	4.41	12.8	0.973	1.44	5.62	35.01	1.47424	2.12291	8.28524	51.6132	1.47424	2.10189	1.87874	4.03228
LKP 0395	0.559	0.64	2.16	9.35	0.893	0.66	2.34	15.94	1.5975	1.05435	3.73814	25.4641	1.5975	1.64742	1.73062	2.72343
LKP 0415	0.566	0.81	3.81	17.68	0.682	1.66	3.6	19.43	1.20495	2.00021	4.33781	23.4121	1.20495	2.4694	1.13853	1.32421
LKP 184592	0.2504	0.89	3.17	13.72	0.9275	0.83	5.21	17.2	3.70407	3.07438	19.2982	63.7101	3.70407	3.45436	6.08777	4.64359
LKP 184708	0.5408	1.74	3.68	4.77	0.9653	1.11	3.08	6.35	1.78495	1.98129	5.49764	11.3344	1.78495	1.13867	1.49392	2.37619
LKP 198693	0.5338	1.06	1.49	3.76	0.9756	1.02	2.17	6.48	1.82765	1.8642	3.966	11.8432	1.82765	1.75868	2.66175	3.14978
LKP 198760	0.7655	0.47	2.26	3.95	0.9359	0.38	2.16	4.64	1.2226	0.464588	2.64082	5.67286	1.2226	0.988485	1.1685	1.43617
LKP 199882	0.5429	0.9	2.11	6.08	0.8273	0.9	2.23	7.1	1.52385	1.37147	3.39819	10.8194	1.52385	1.52385	1.61052	1.7795
LKP 200579	0.416	1.43	4.69	16.64	0.9649	1.24	4.14	16.74	2.31947	2.87614	9.60261	38.8279	2.31947	2.01129	2.04746	2.33341
LKP 200592	0.4282	1.7	3.9	35.68	0.9723	1.7	3.89	33.74	2.27067	3.86014	8.8329	76.6123	2.27067	2.27067	2.26485	2.14721
LKP 200643	0.1826	0.99	2.67		0.7816	1.08	3.34	10.39	4.28039	4.62283	14.2965	44.4733	4.28039	4.66952	5.3545
LKP 200895	0.618	0.71	5.71	23.04	0.946	0.94	5.96	20.21	1.53074	1.4389	9.12324	30.9363	1.53074	2.02662	1.59776	1.34272
LKP 200897	0.383	0.74	6.53	28.21	0.851	0.84	7.54	33.53	2.22193	1.86642	16.7534	74.5014	2.22193	2.52219	2.5656	2.64096
LKP 478	0.4191	1.01	2.6	11.88	0.9066	1.84	3.95	16.38	2.16321	3.9803	8.54467	35.4333	2.16321	3.94089	3.28641	2.9826
LKP 76723	0.25	0.92	1.71	2.87	0.809	0.74	1.44	2.41	3.236	2.39464	4.65984	7.79876	3.236	2.60287	2.72505	2.71734
LKP 85778	0.7192	0.93	2.17	5.12	0.961	1.04	3.87	6.9	1.33621	1.38966	5.17112	9.21983	1.33621	1.49425	2.383	1.80075
Average	0.481825	1.108	3.2925	11.8847	0.90895	1.0985	3.6905	14.712	2.125	2.31194	7.85345	30.6027	2.125	2.15554	2.42312	2.57839
STDEV	0.155839	0.403454	1.34634	9.10571	0.0808036	0.358686	1.72828	10.3033	0.835974	1.03088	4.84799	22.822	0.835974	0.940619	1.29641	1.02383

## Sheet: Cytokine information
	Average of pg/mL
Factor	Source	FICOLL	DLD	Ficoll % Reduction	DLD % Reduction	Relative (F/D)	Primary role in starting apheresis material (pre–T cell selection)
Myeloperoxidase	446105	113854	63311.4	0.744782	0.85808	1.79832	Neutrophil degranulation marker indicating high granulocyte carryover and oxidative stress
Cathepsin D	189088	44817.1	18671.7	0.762983	0.901254	2.40027	Monocyte/macrophage lysosomal activity reflecting myeloid activation
NCAM	206721	18123.1	4755.5	0.912331	0.976996	3.81098	Platelet and NK/T-cell adhesion marker elevated with platelet activation and cell–cell aggregation
PDGF-BB	13936.6	17382.5	1958.4	-0.247255	0.859478	8.87587	Platelet activation product & growth factor spillover
TGF-b	46020.6	17202.4	969.3	0.626202	0.978938	17.7472	Platelet-derived immunosuppressive cytokine suppressing T-cell proliferation
RANTES (CCL5)	22657.2	7742.9	1062.2	0.658259	0.953119	7.28949	Platelet-derived chemokine; binds CCR5 on T cells, inhibits Lentiviral transduction
PDGF-AB/BB	40493.6	7332.3	550.8	0.818927	0.986398	13.3121	Platelet activation signature indicating high platelet contamination
sICAM-1	39261.9	5490.8	2992.3	0.860149	0.923786	1.83498	Endothelial/platelet activation marker reflecting shear stress
PAI-1	32623.8	4192.9	82.2	0.871477	0.99748	51.0085	Platelet and endothelial stress marker; high levels indicate clotting/fibrinolysis imbalance, driver of sensecence
sCD40L	2881.4	2897.9	209.9	-0.00572638	0.927153	13.8061	Platelet activation marker associated with T-cell priming and inflammatory skew
GRO-a (CXCL1)	2788	1752.9	15.3	0.37127	0.994512	114.569	Neutrophil chemoattractant indicating granulocyte activation and carryover
sVCAM-1	352722	1131.9	2768.7	0.996791	0.99215	0.40882	Endothelial activation marker; elevated with shear stress and platelet activation
BDNF	8248.9	608.8	141.2	0.926196	0.982883	4.31161	Platelet-derived neurotrophin indicating platelet load
PDGF-AA	1548	271.8	16.2	0.824419	0.989535	16.7778	Platelet activation marker
EGF	216.8	215	8.8	0.00830258	0.95941	24.4318	Platelet-derived growth factor indicating platelet activation
FGF-2	376.1	149.8	0.9	0.601702	0.997607	166.444	Platelet-derived growth factor; elevated with platelet presence
MDC (CCL22)	1527.5	67.2	4.1	0.956007	0.997316	16.3902	Monocyte/DC activation marker indicating APC carryover
VEGF-a	223	54.8	22.4	0.75426	0.899552	2.44643	Platelet activation marker; correlates with platelet-rich status
IP-10 (CXCL10)	182.4	38.6	25.4	0.788377	0.860746	1.51969	IFN-driven chemokine indicating antiviral state
IL-8 (CXCL8)	12.7	35.1	0.2	-1.76378	0.984252	175.5	Neutrophil activation marker ; known inhibitor of lentiviral transduction
MIP-1b (CCL4)	263.2	23	0.2	0.912614	0.99924	115	T-cell/myeloid activation marker indicating inflammatory skew
IFN-a2	5.3	12.7	1.4	-1.39623	0.735849	9.07143	Type I IFN signature indicating antiviral state that suppresses viral vector integration
Fractalkine (CX3CL1)	5.6	9.9	2.1	-0.767857	0.625	4.71429	Monocyte adhesion/activation marker indicating myeloid carryover
MCP-1 (CCL2)	247.1	9.6	0.2	0.961149	0.999191	48	Monocyte recruitment marker
IL-17A	2.5	5.8	0.6	-1.32	0.76	9.66667	Th17 skew marker indicating inflammatory donor state
IL-1a	0.2	5.8	6.5	-28	-31.5	0.892308	Cell damage marker indicating stressed starting collection (more cells in DCS)
TNF-a	26.9	4.9	3.3	0.817844	0.877323	1.48485	Inflammatory cytokine indicating donor activation ; drives T-cell exhaustion
GM-CSF	25.5	2.9	2	0.886275	0.921569	1.45	Myeloid activation marker; increases monocyte-driven suppression
G-CSF	6	2.5	0.3	0.583333	0.95	8.33333	Mobilization signature ; associated with poor CAR-T expansion phenotype
IL-1RA	702.3	2.4	0.3	0.996583	0.999573	8	Compensatory anti-inflammatory marker indicating upstream IL‑1 activity
MIP-1a (CCL3)	7.9	1.3	1.8	0.835443	0.772152	0.722222	Myeloid/T-cell activation marker
IL-3	0.6	0.5	0.6	0.166667	0	0.833333	Hematopoietic cytokine indicating progenitor activation
IL-9	24.1	0.4	0.3	0.983402	0.987552	1.33333	Th9 cytokine indicating allergic/inflammatory skew
IL-12p70	2.4	0.4	0.4	0.833333	0.833333	1	Th1-driving cytokine indicating APC activation
IFN-g	1	0.4	0.2	0.6	0.8	2	Th1 cytokine indicating activated donor T cells ; reduces Tscm/Tcm yield
IL-7	3.6	0.3	0.2	0.916667	0.944444	1.5	T-cell survival cytokine; elevated with lymphocyte activation
IL-2	0.1	0.3	0.2	-2	-1	1.5	T-cell activation marker; indicates activated donor phenotype
IL-18	861.3	0.2	1	0.999768	0.998839	0.2	Inflammasome activation marker indicating donor inflammatory state
Eotaxin-1	220.1	0.2	0.2	0.999091	0.999091	1	Allergic/eosinophilic signature
IL-12p40	34	0.2	0.2	0.994118	0.994118	1	IL‑12/23 axis activation marker
Flt-3L	33.3	0.2	0.2	0.993994	0.993994	1	DC/progenitor activation marker indicating APC carryover
IL-4	17.3	0.2	0.3	0.988439	0.982659	0.666667	Th2 skew marker indicating donor immune bias
IL-15	2.7	0.2	0.2	0.925926	0.925926	1	NK/CD8 memory cytokine; elevated with activated lymphocytes
TGF-a	2	0.2	1	0.9	0.5	0.2	Platelet-derived growth factor indicating platelet activation
IL-1b	1.4	0.2	0.4	0.857143	0.714286	0.5	Inflammasome cytokine indicating stressed starting collection
IL-10	0.8	0.2	0.2	0.75	0.75	1	Anti-inflammatory cytokine indicating strong upstream activation
IL-13	0.2	0.2	0.2	0	0	1	Th2 cytokine indicating allergic/inflammatory skew
IL-6	0.2	0.2	0.2	0	0	1	Acute-phase cytokine indicating donor inflammation ; reduces T-cell quality
MCP-3 (CCL7)	0.2	0.2	0.2	0	0	1	Monocyte recruitment marker
TNF-b	0.2	0.2	0.2	0	0	1	Lymphotoxin marker indicating lymphocyte activation
IL-5	0.1	0	0	1	1	-	Th2/eosinophil cytokine indicating allergic donor state

## Sheet: CD69+
	DLD				FICOLL		Ficoll
Row Labels	Microfluidic controler	Average of 3: CD4+CD69+ % Parent	Average of 3: CD8+CD69+ % Parent	CD3+ CD69+(CD4+ + CD8+ = CD3+)	Average of 3: CD4+CD69+ % Parent	Average of 3: CD8+CD69+ % Parent	CD3+ CD69+(CD4+ + CD8+ = CD3+)
LKP 0293	Pressure	0.0235	0.0439	0.0674	0.1248	0.1216	0.2464
LKP 0296	Pressure	0.0081	0.0218	0.0299	0.0075	0.0209	0.0284
LKP 0322	Curate	0.0233	0.0357	0.059	0.0738	0.0773	0.1511
LKP 0341	Curate	0.0386	0.0388	0.0774	0.054	0.0525	0.1065
LKP 0359	Curate	0.0097	0.0512	0.0609	0.0126	0.0451	0.0577
LKP 0361	Curate	0.007	0.0633	0.0703	0.0232	0.2254	0.2486
LKP 0381	Curate	0.0136	0.0352	0.0488	0.0205	0.0481	0.0686
LKP 0394	Curate	0.0164	0.0734	0.0898	0.0412	0.2296	0.2708
LKP 0395	Curate	0.0087	0.029	0.0377	0.0161	0.0418	0.0579
LKP 0415	Curate	0.0035	0.0437	0.0472	0.0036	0.0313	0.0349
LKP 0353	Curate	0.0078	0.0203	0.0281	0.0087	0.0403	0.049
LKP 200579	Curate	0.0179	0.0426	0.0605	0.0197	0.053	0.0727
LKP 200580	Pressure	0.0091	0.0392	0.0483	0.02	0.0335	0.0535
LKP 200592	Curate	0.006	0.00905	0.01505	0.01895	0.0293	0.04825
LKP 200594	Pressure	0.01	0.0134	0.0234	0.0285	0.074	0.1025
LKP 76615	Pressure	0.0057	0.0136	0.0193	0.0157	0.039	0.0547
LKP 200643	Curate	0.0067	0.0185	0.0252	0.0192	0.0387	0.0579
LKP 200677	Curate	0.0073	0.0274	0.0347	0.0106	0.0303	0.0409
LKP 76723	Curate	0.0078	0.0136	0.0214	0.0168	0.0485	0.0653
LKP 200895	Curate	0.0034	0.0419	0.0453	0.0049	0.0854	0.0903
LKP 200897	Curate	0.0036	0.0245	0.0281	0.0103	0.0393	0.0496

## Sheet: T-cell phenotype
Ratio of DCS/Ficoll	4: TN: R7+95-RA+	4: TCM: R7+95+RA-62L+	4: TEM: R7-95+RA-62L-	4: TEMRA: R7-95+RA+62L-	8: TN: R7+95-RA+	8: TCM: R7+95+RA-62L+	8: TEM: R7-95+RA-62L-	8: TEMRA: R7-95+RA+62L-
LKP0322	0.330202	0.310778	0.679427		1.10067	0.206376	0.720193	0.805849
LKP0359	1.05098	0.432161	1.48961	0.798583	0.480016	1.15204	1.01161	1.02801
LKP0381	0.608703	0.567773	0.813719	0.628993		0.349441	0.654731	0.736241
LKP0395	0.529329	0.450821	0.849448	0.576285	0.0914738	0.200447	0.421063	0.505808
LKP0415	1.32843	1.16423	1.45837	0.412512	0.783452	0.458346	1.62574	1.40434
LKP200592	0.456113	0.69966	0.824638	0.847981	0.204294	0.371896	0.992238	0.628659
LKP200579	1.09893	1.8634	0.78836	0.430014	0.156369		2.01868	0.941936
LKP200643	0.548344	0.661073	0.62005	0.331032	0.319036	0.463742	0.640847	0.498401
