# Supplementary material for: Cell therapy manufacturing at full clinical scale: enhancing the quality CAR-T cell therapy starting materials through massively parallel automated microfluidic cell sorting
Source: Royal Society of Chemistry journal article supplement (doi:10.1039/d6lc00072j), 2026-04-02
Supplement: d6lc00072j4.pdf [file d6lc00072j4.pdf]

### A. Separation and Wash

Bag scale sample

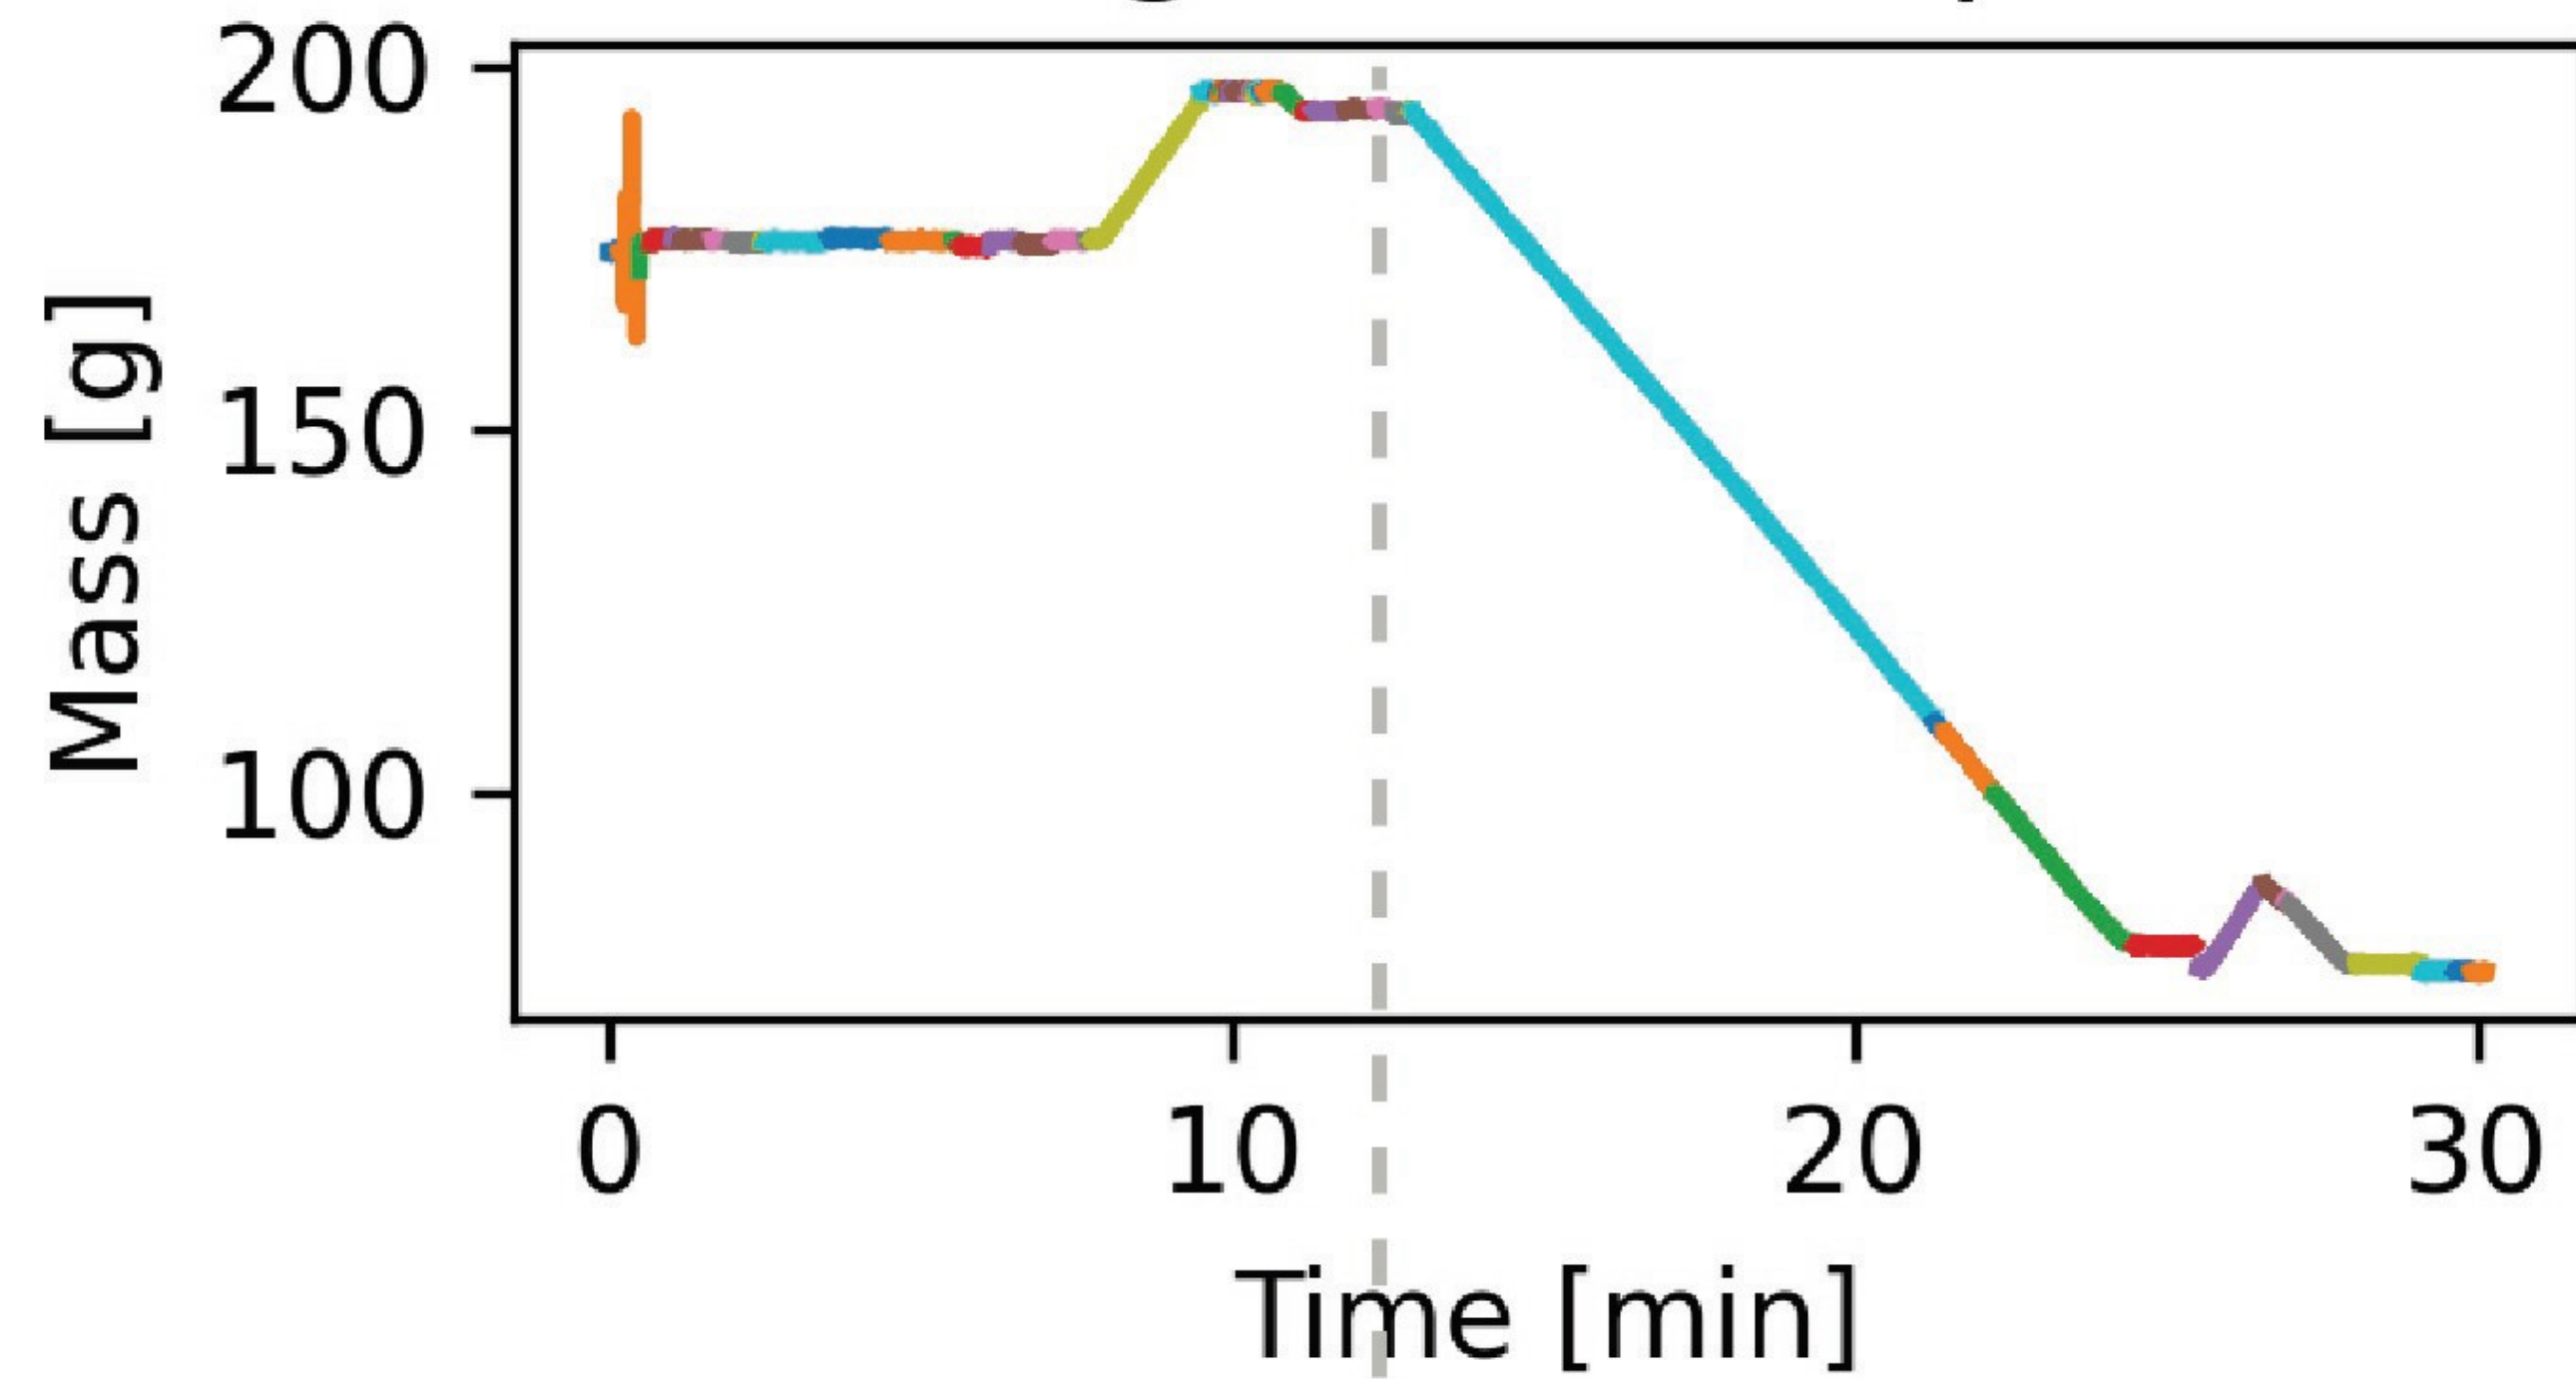

Bag scale product

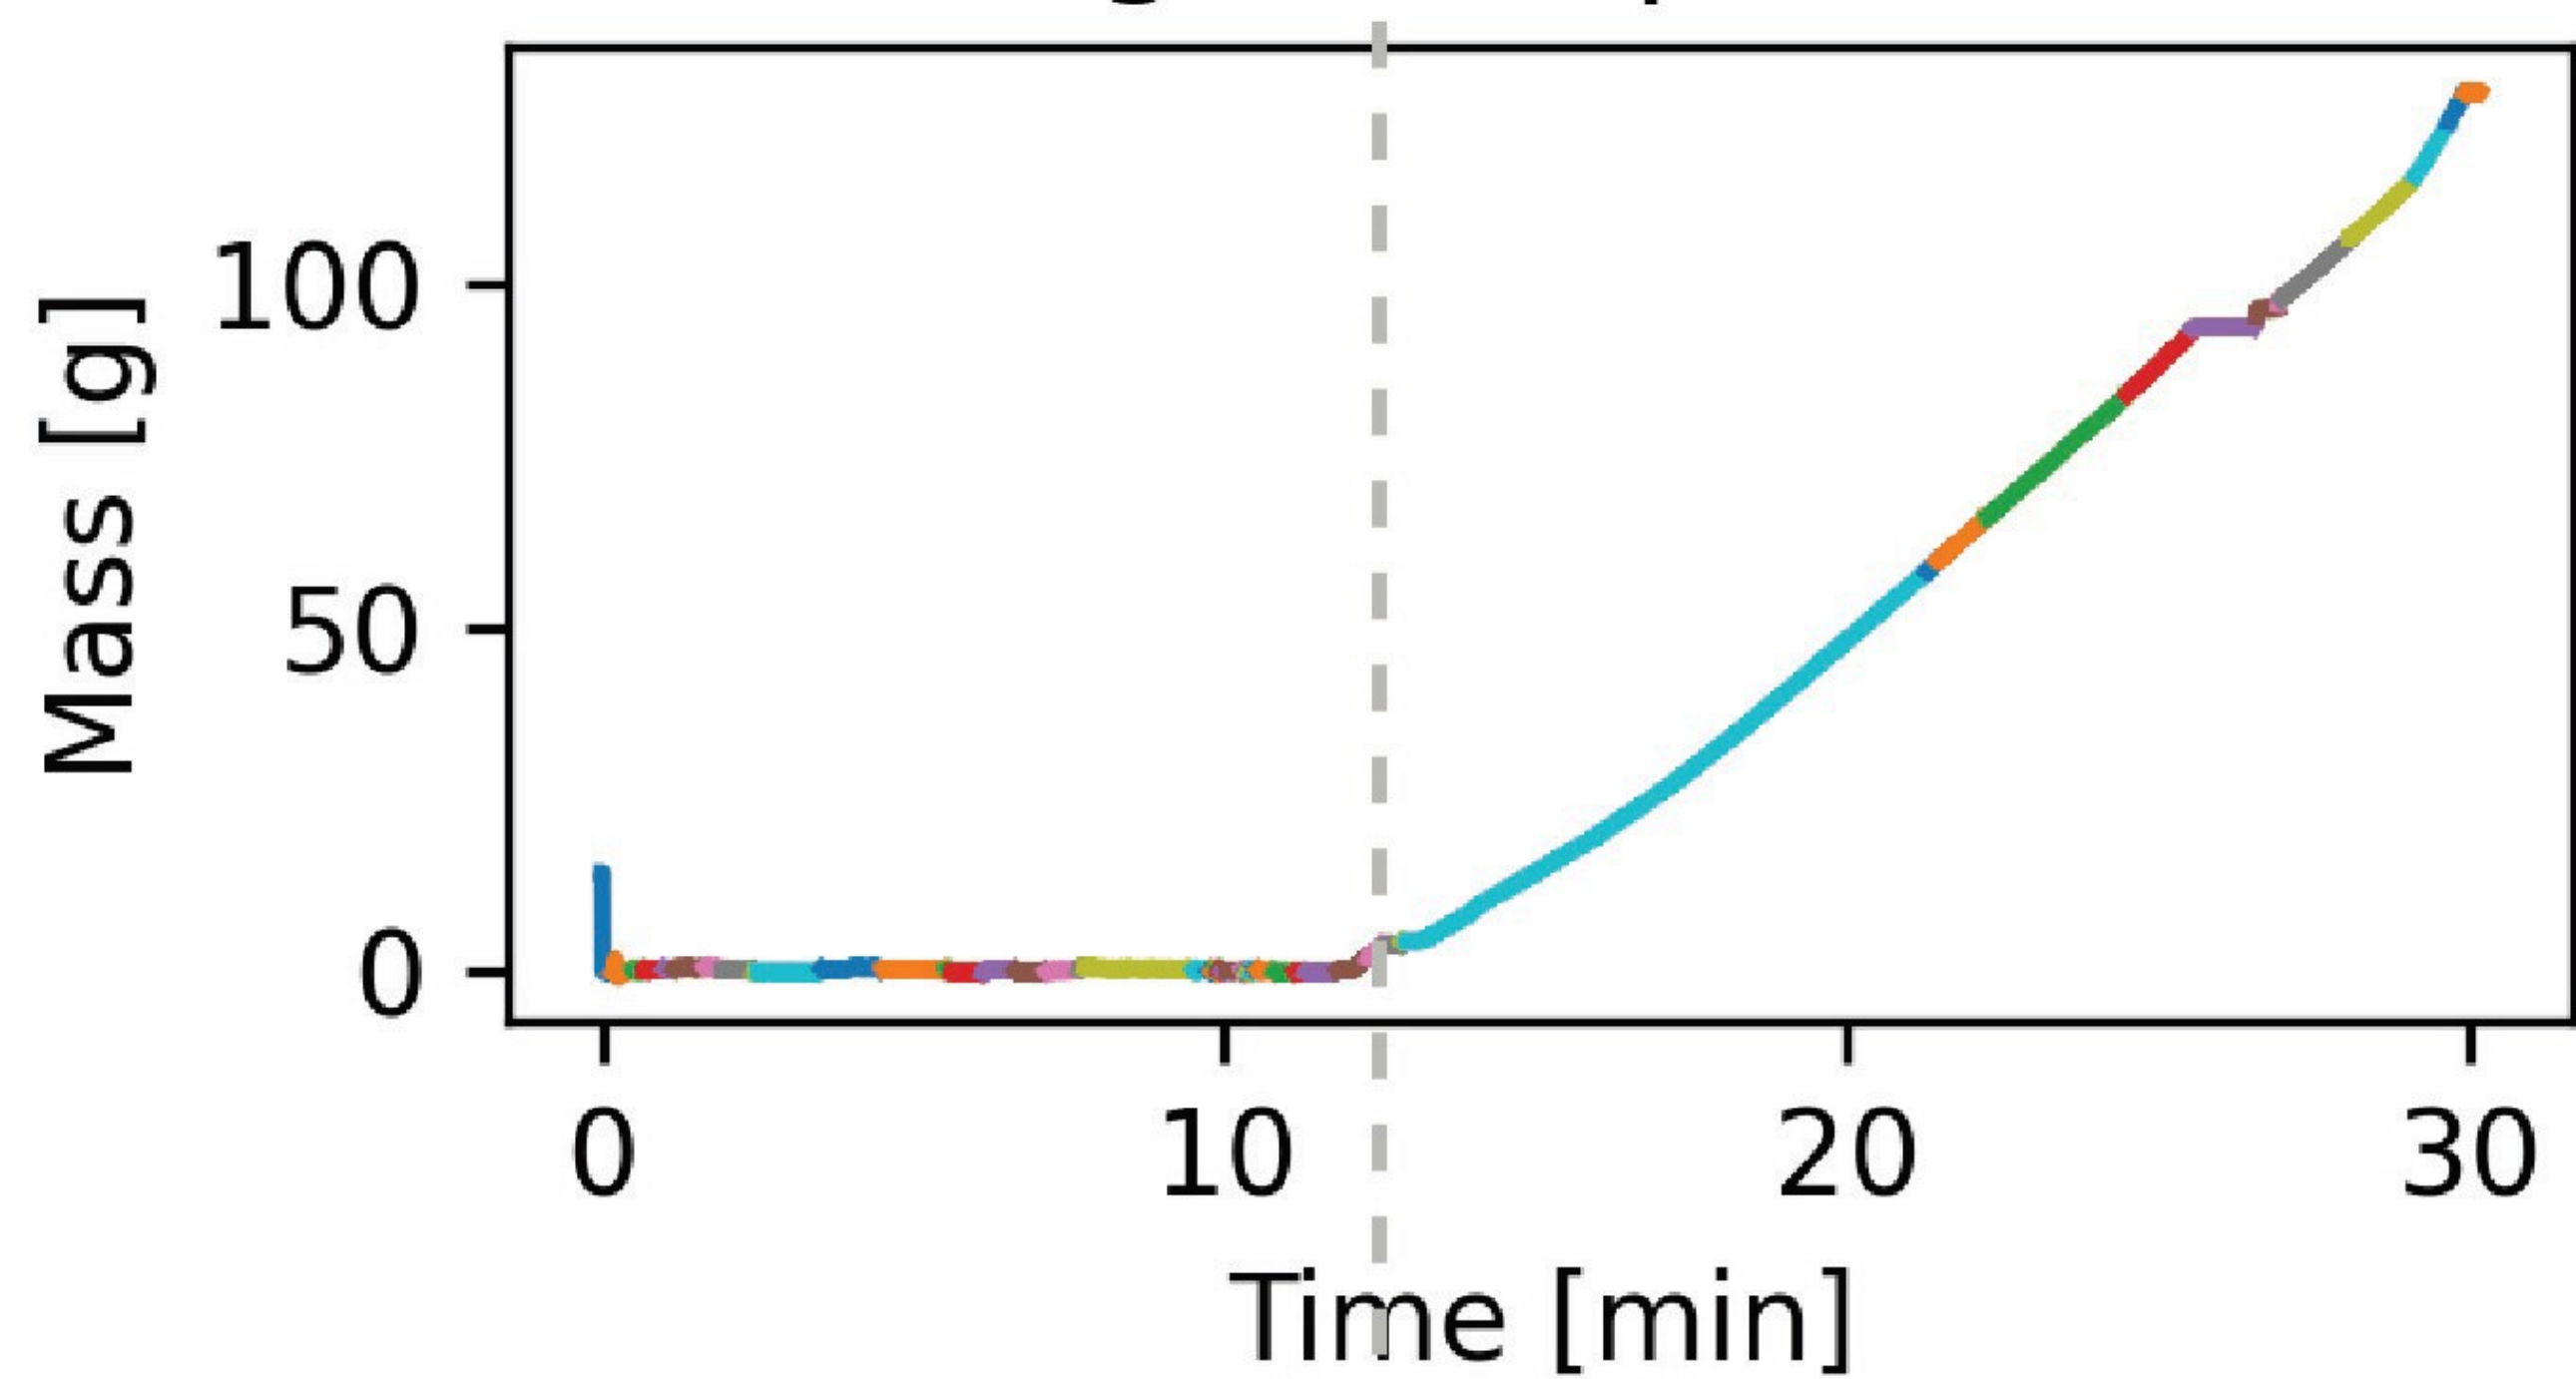

Pressure sensor 2

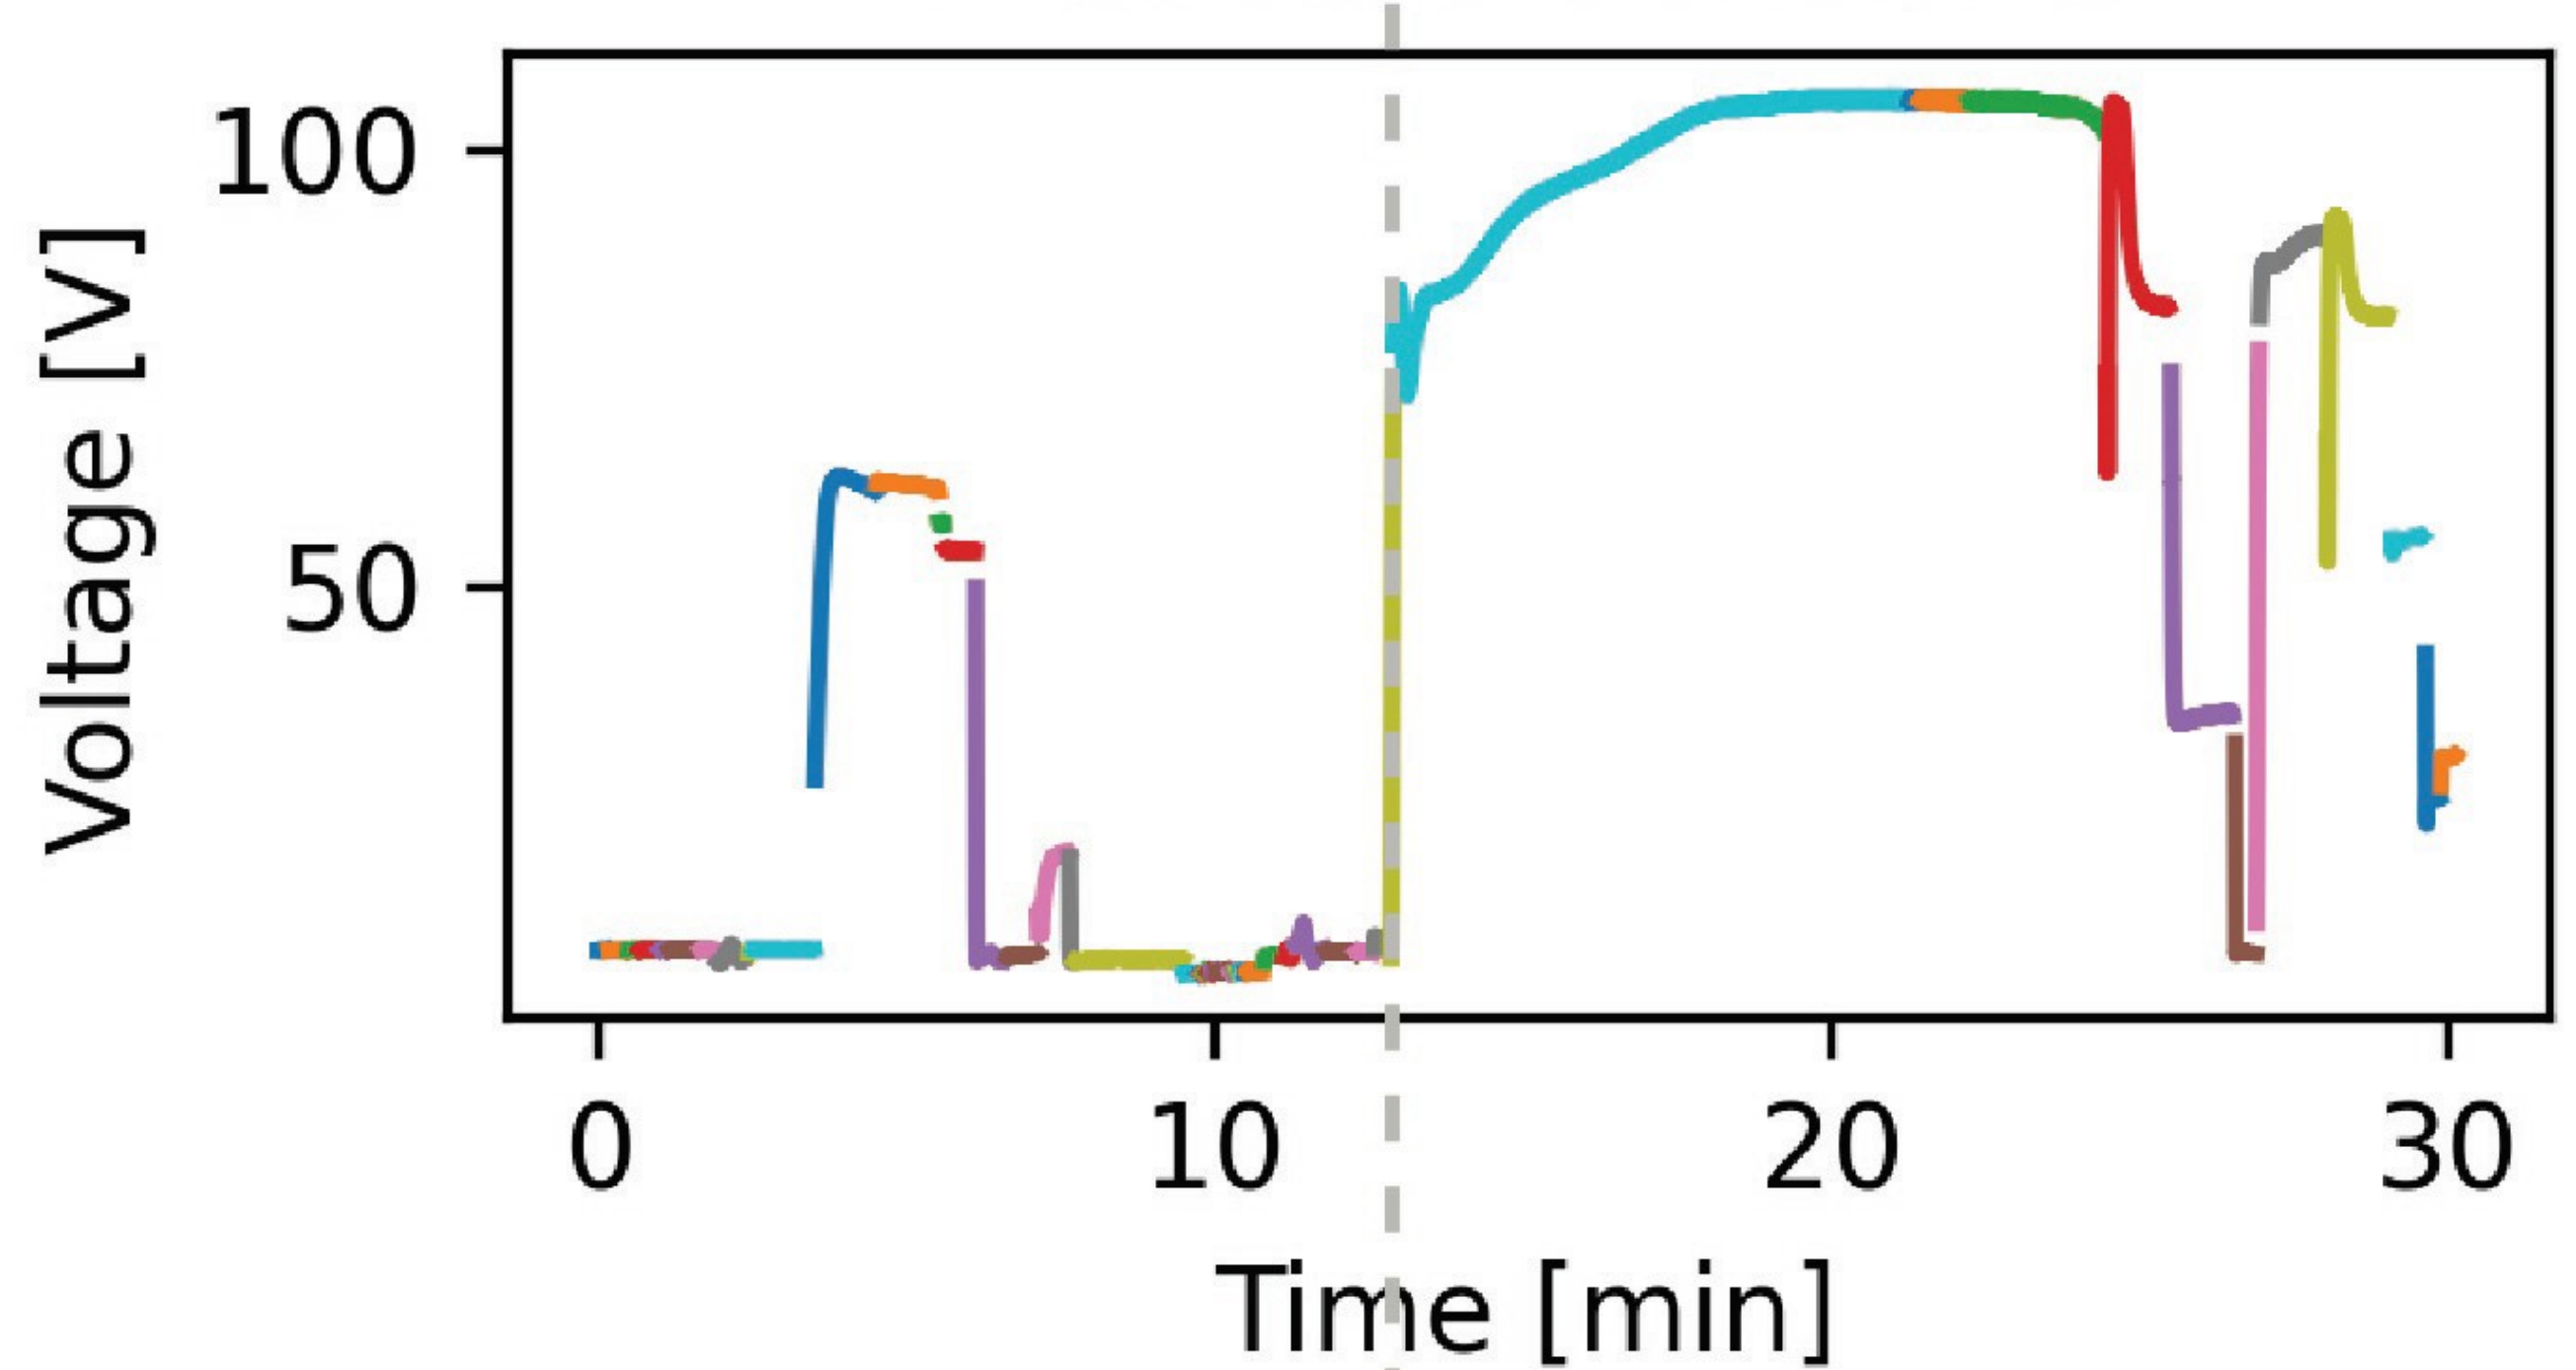

**Priming Stage**

**Sample Processing**

### B. Separation, Wash and Concentration

Bag scale sample

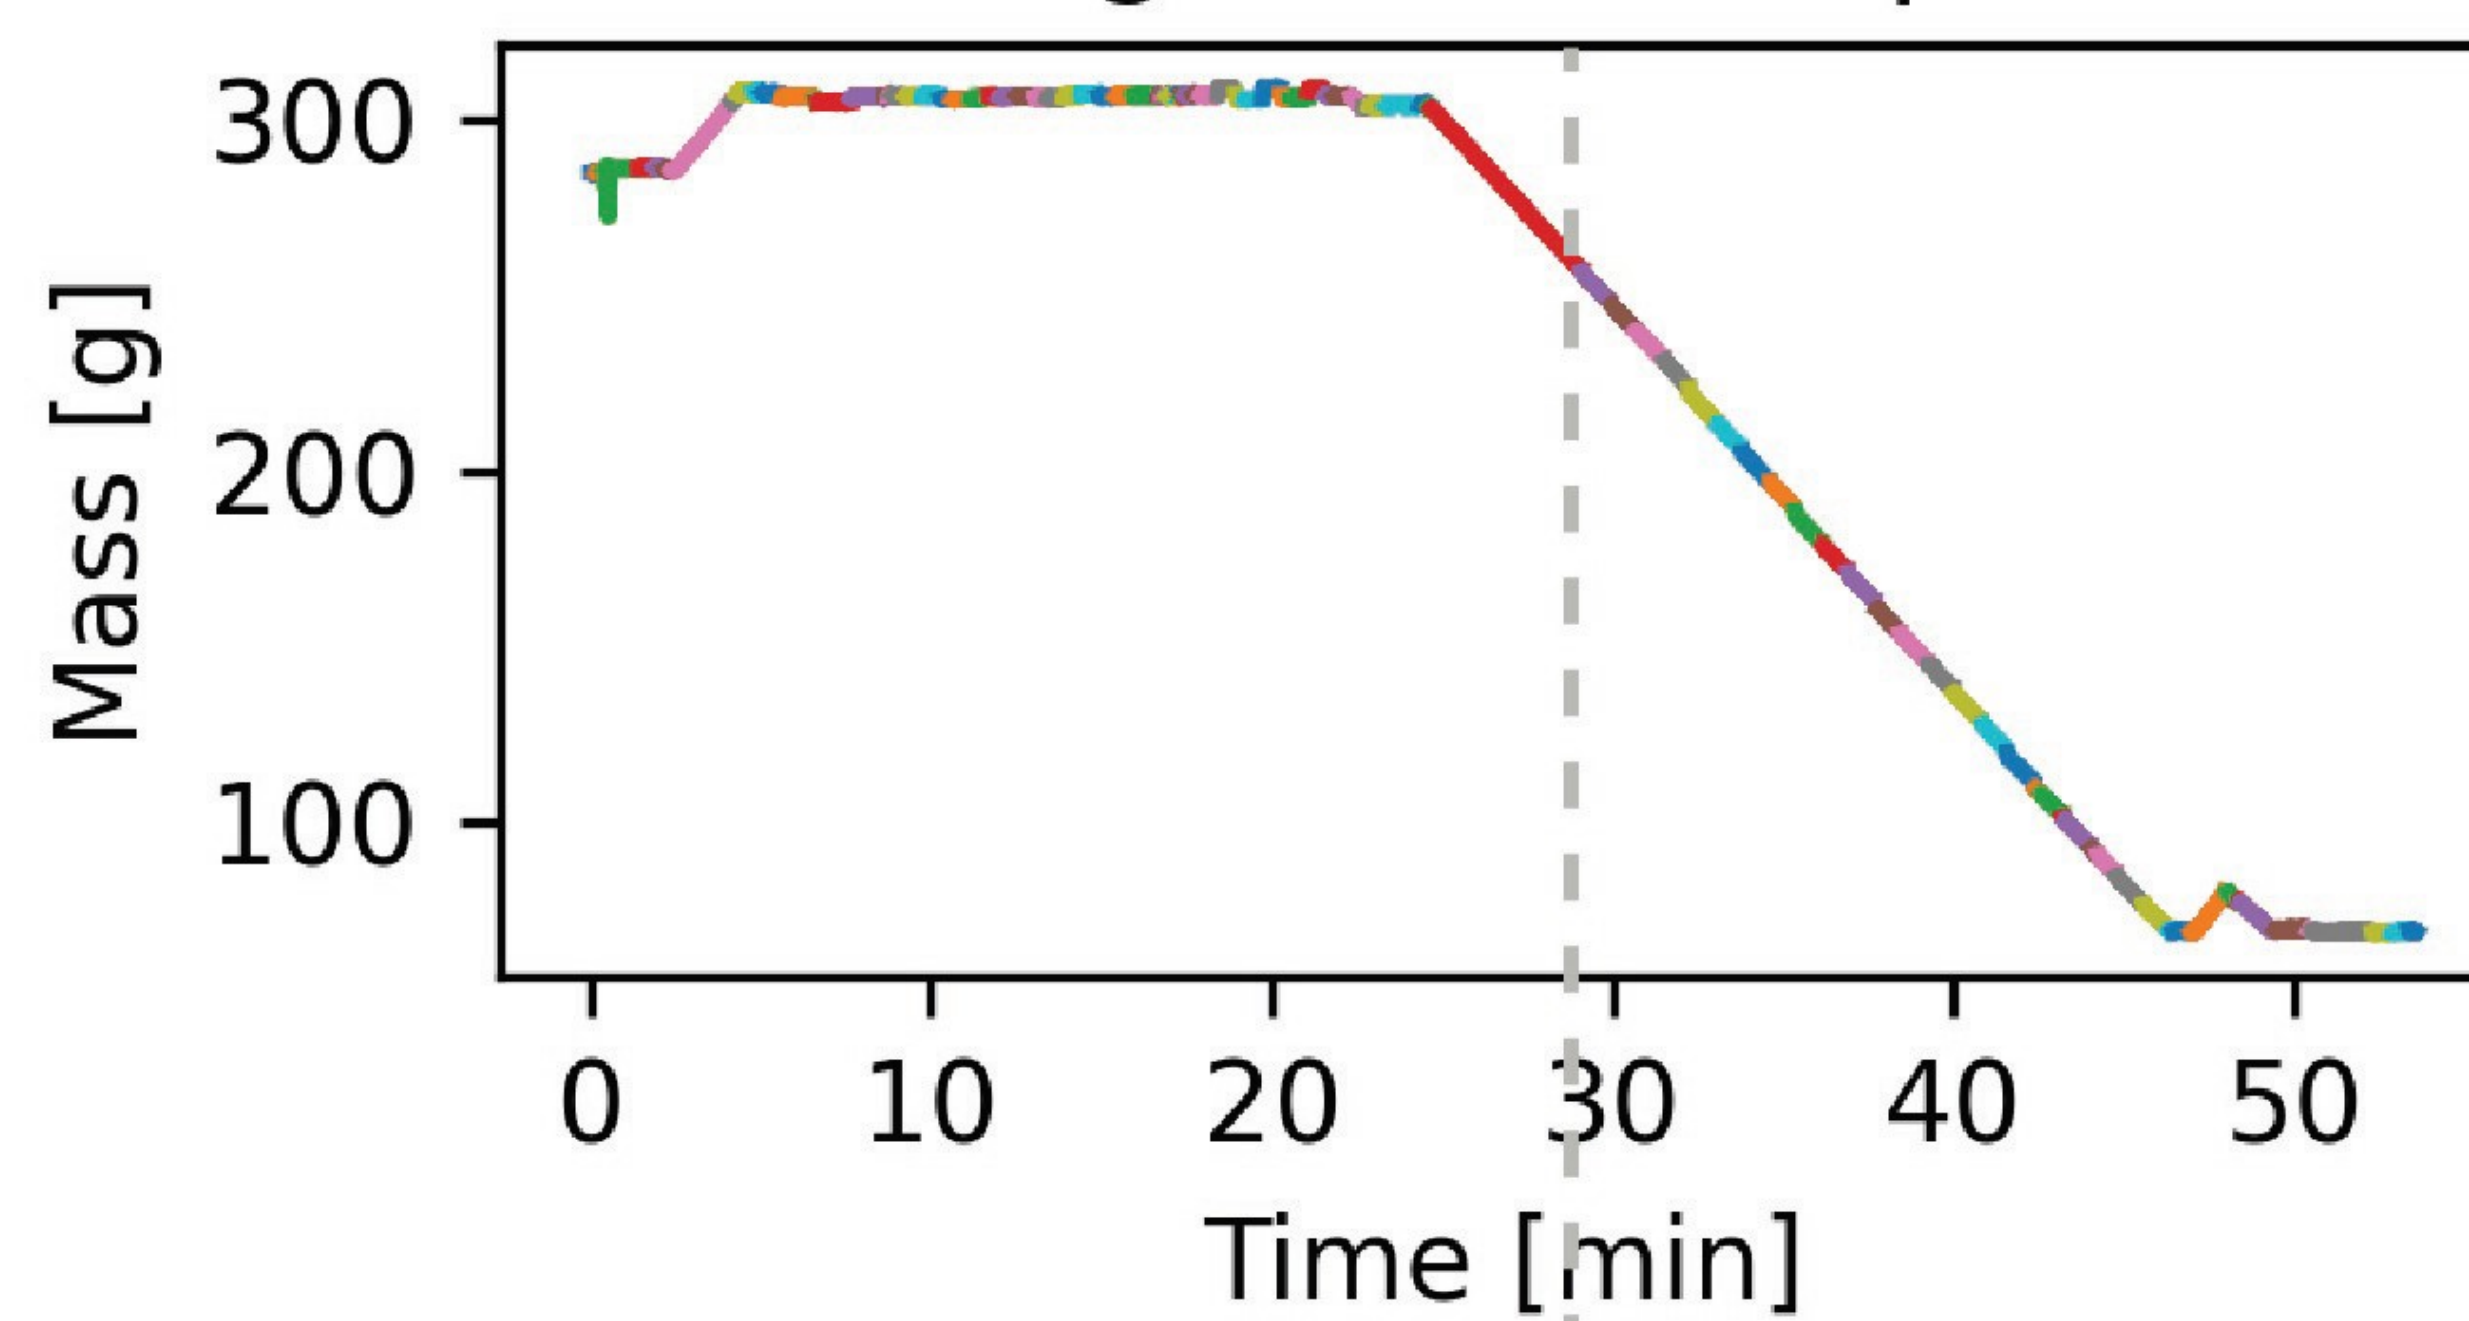

Bag scale product

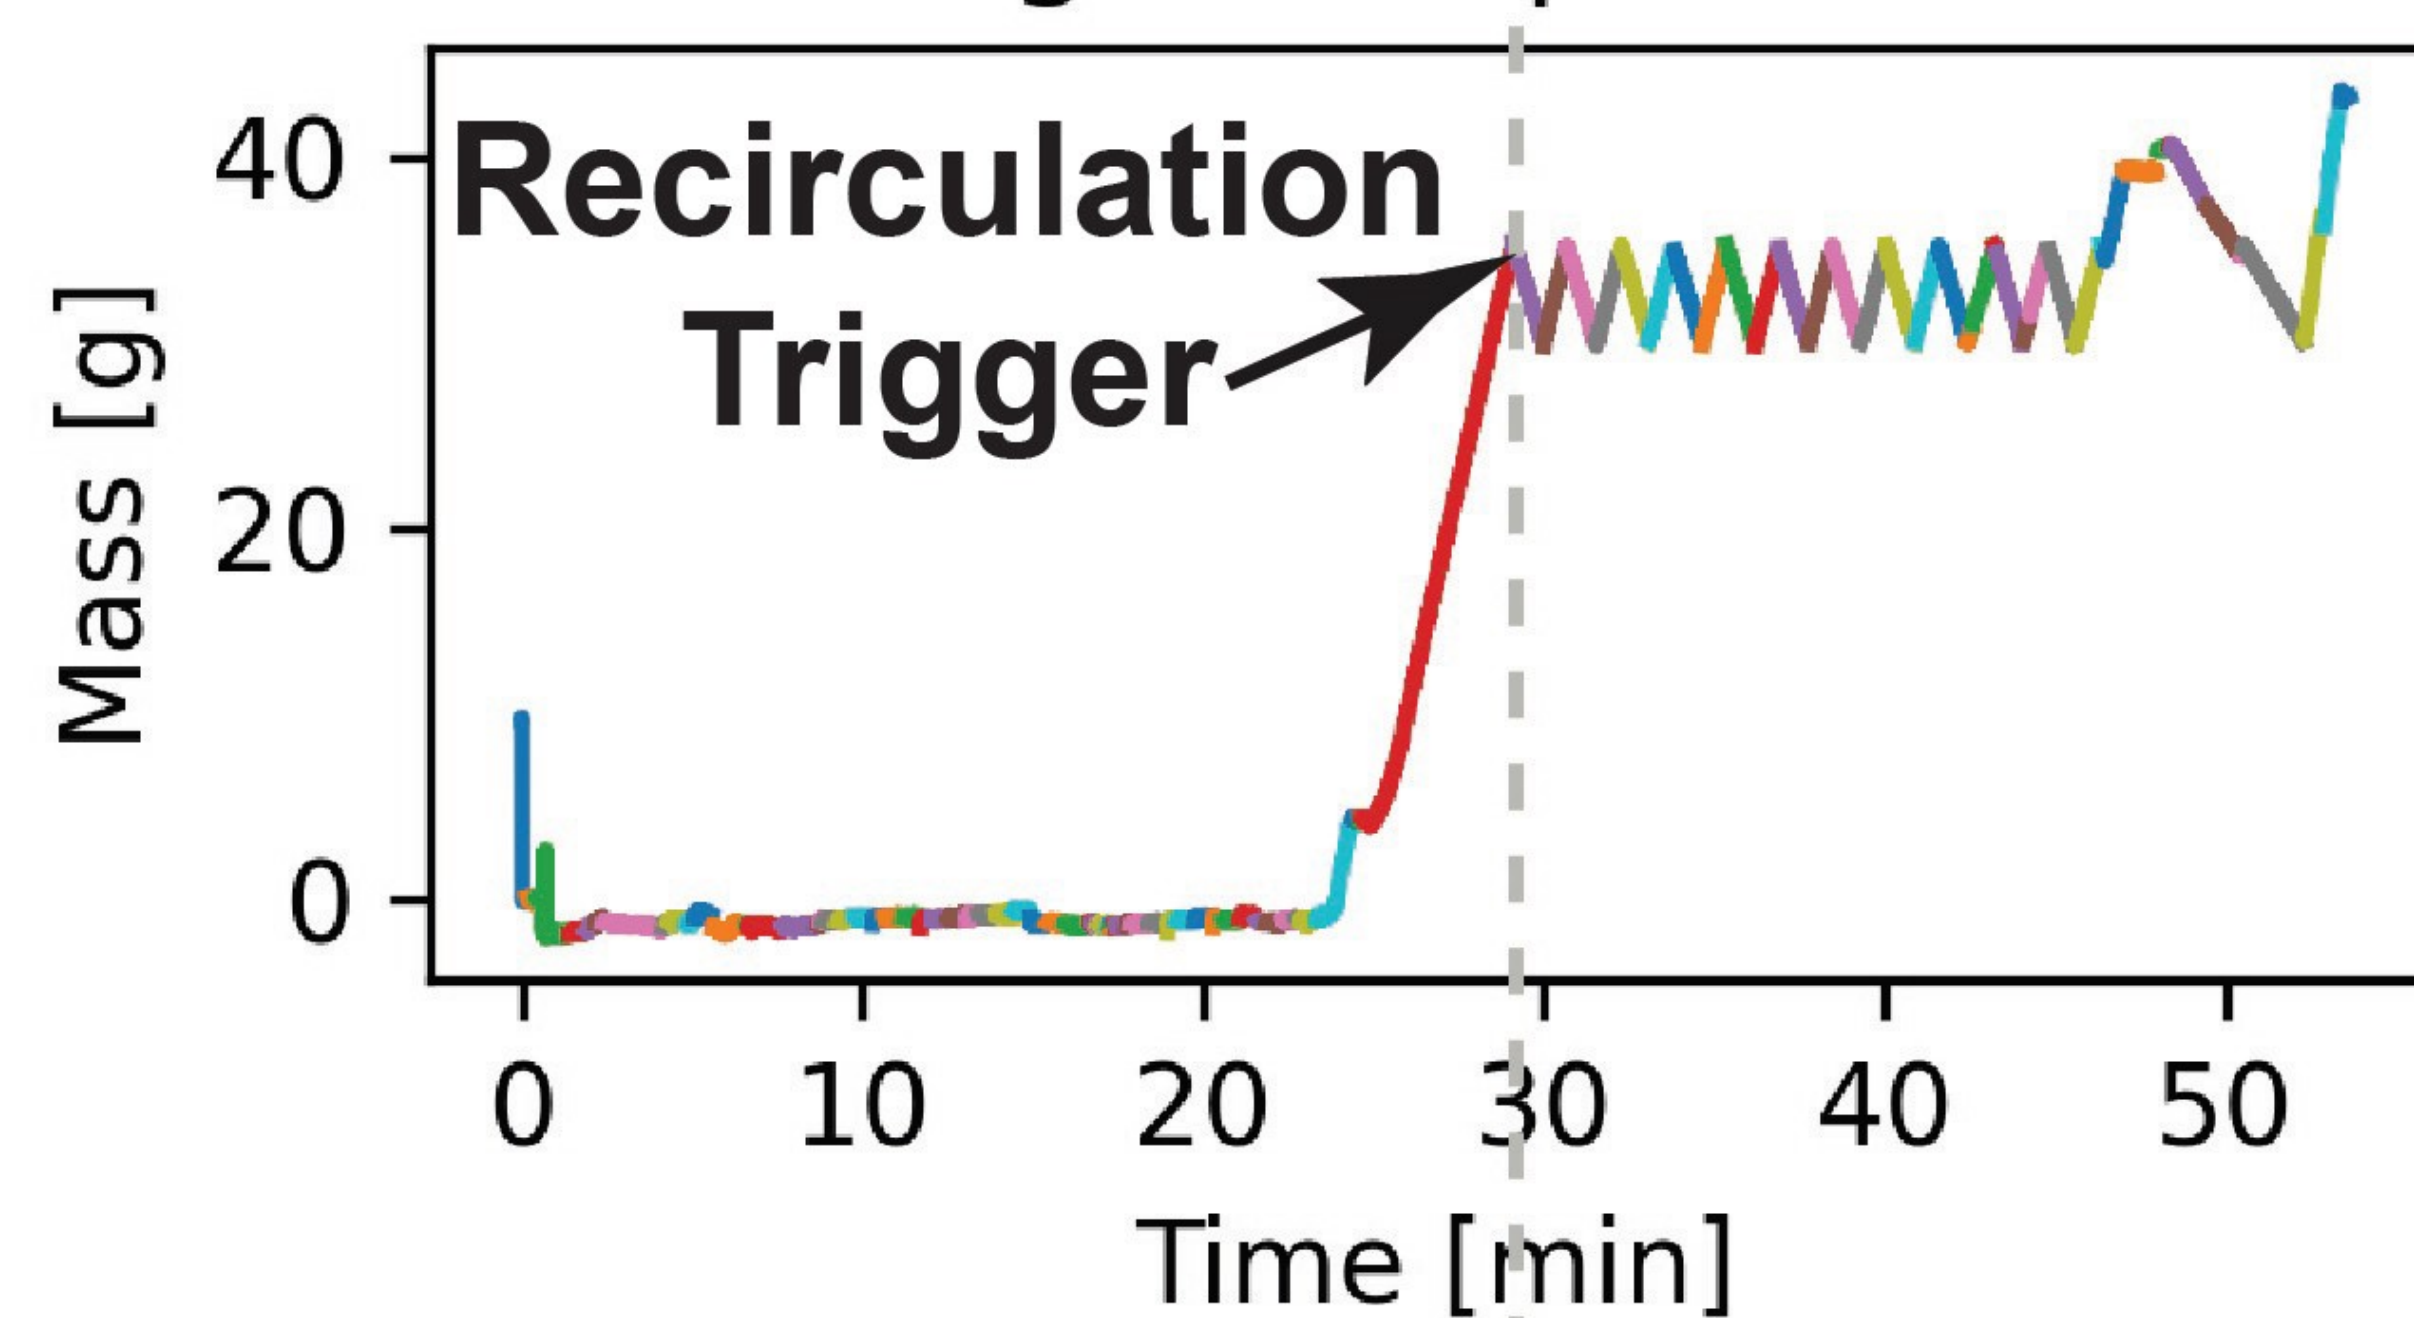

Pressure sensor 2

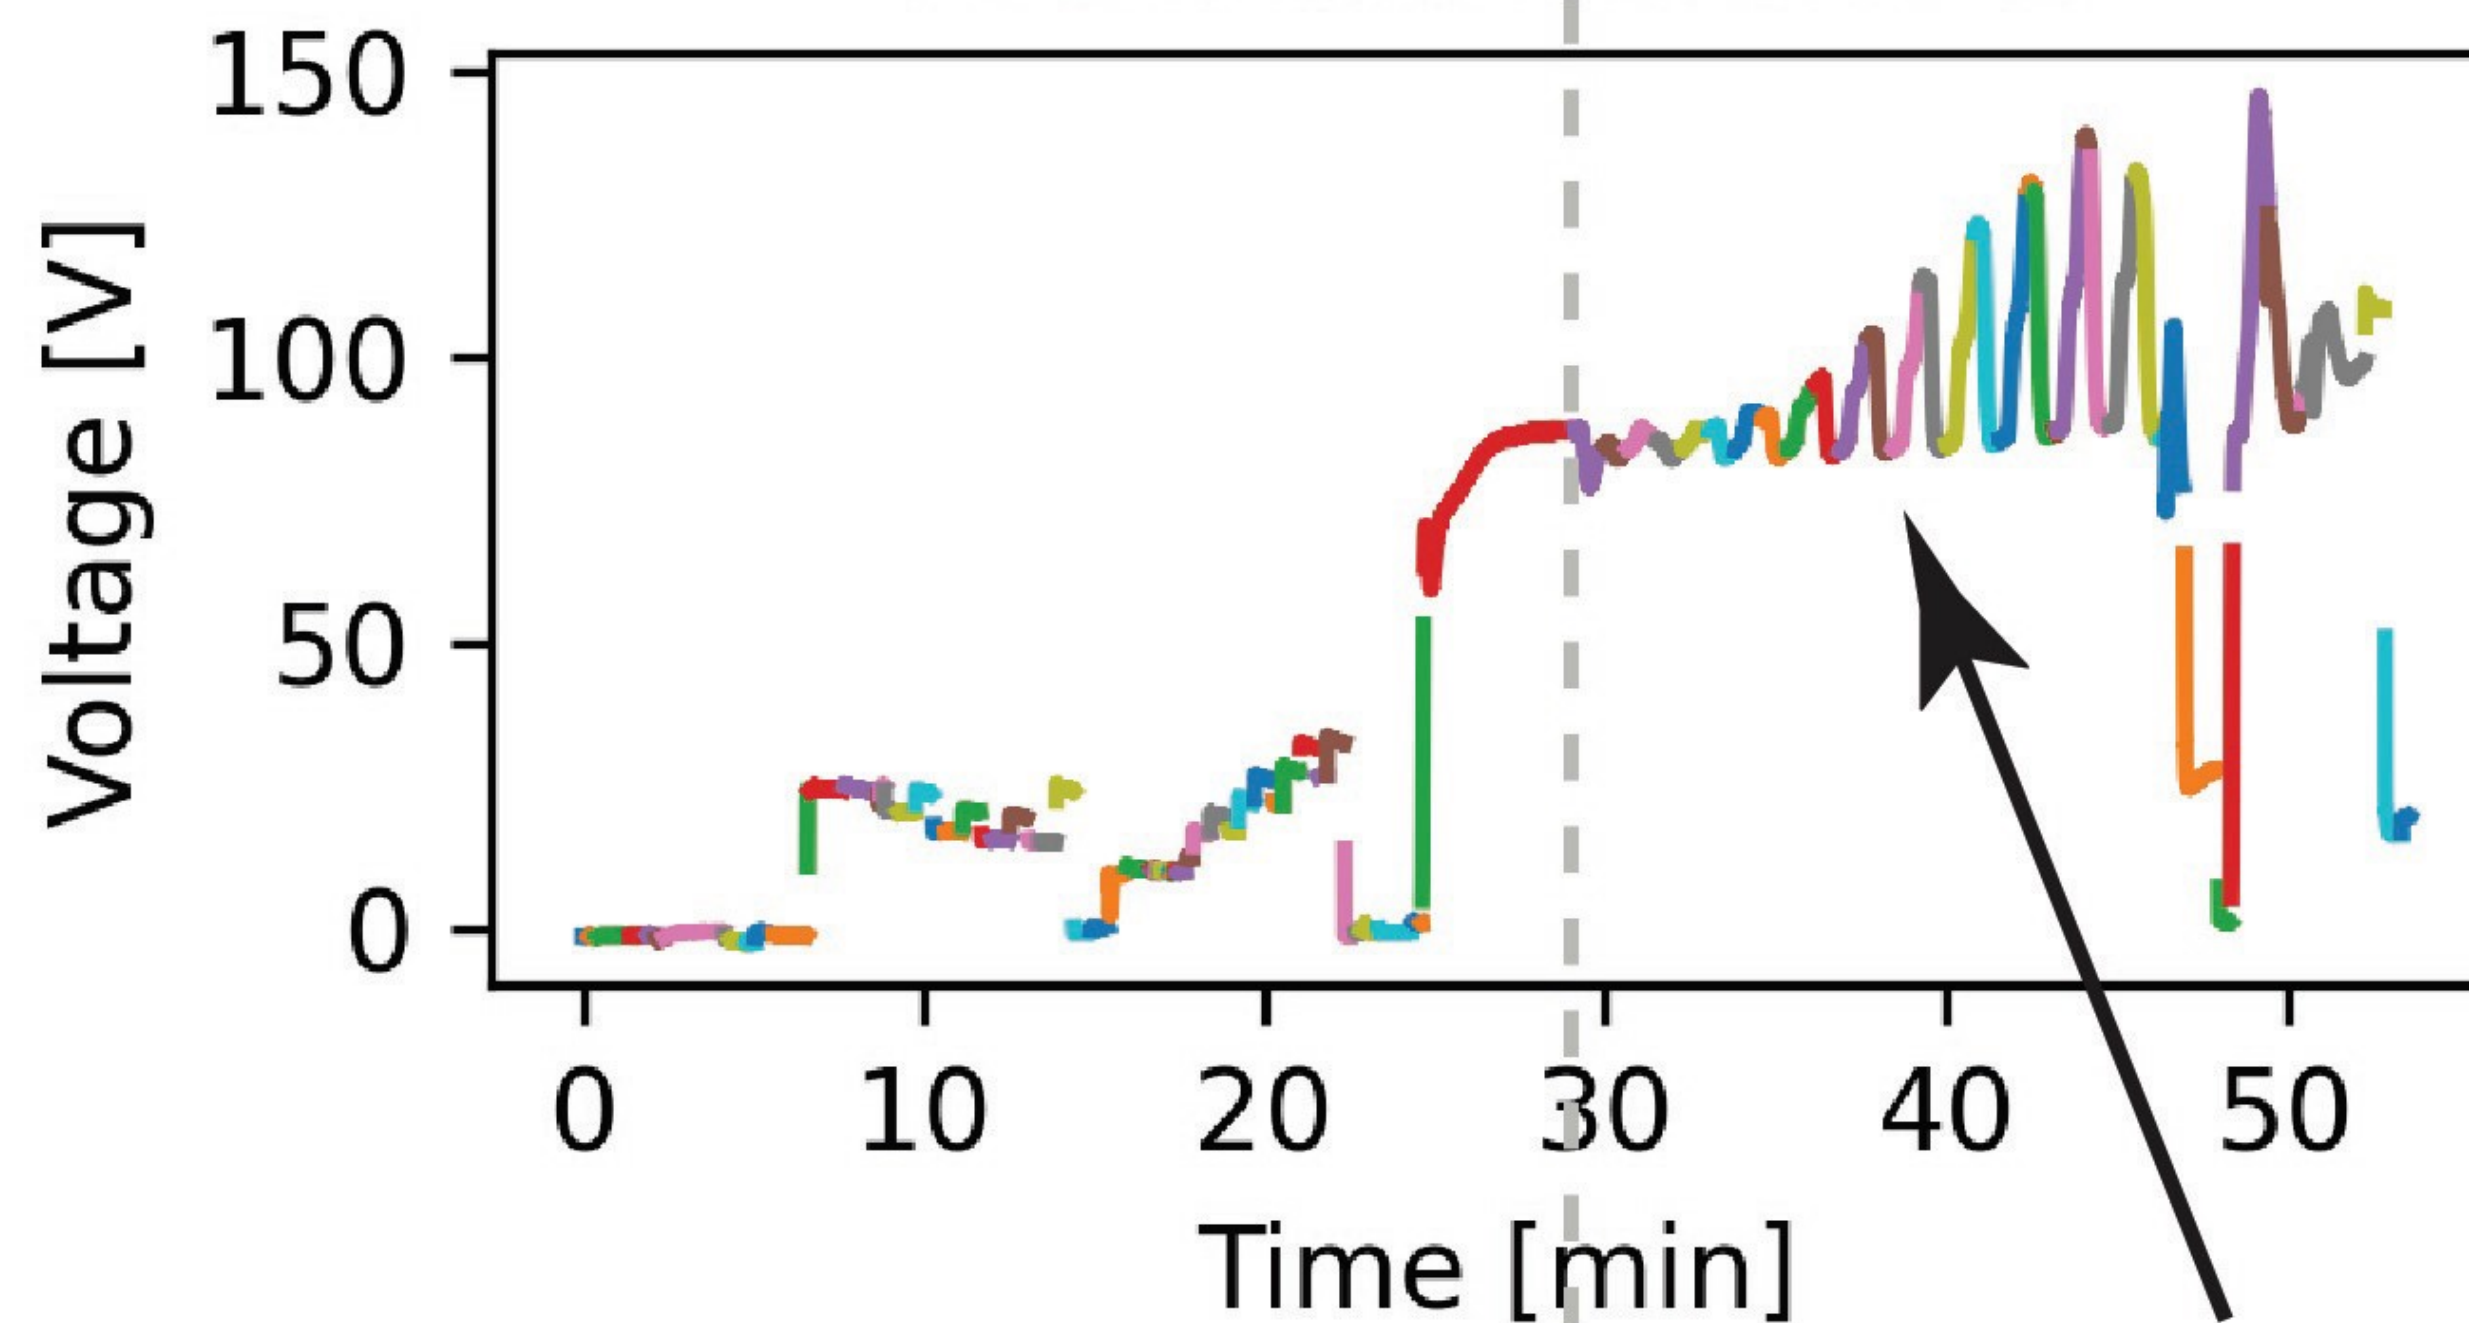

**Pressure Increase**

### C. Autoscaled and Aborted Run

Bag scale sample

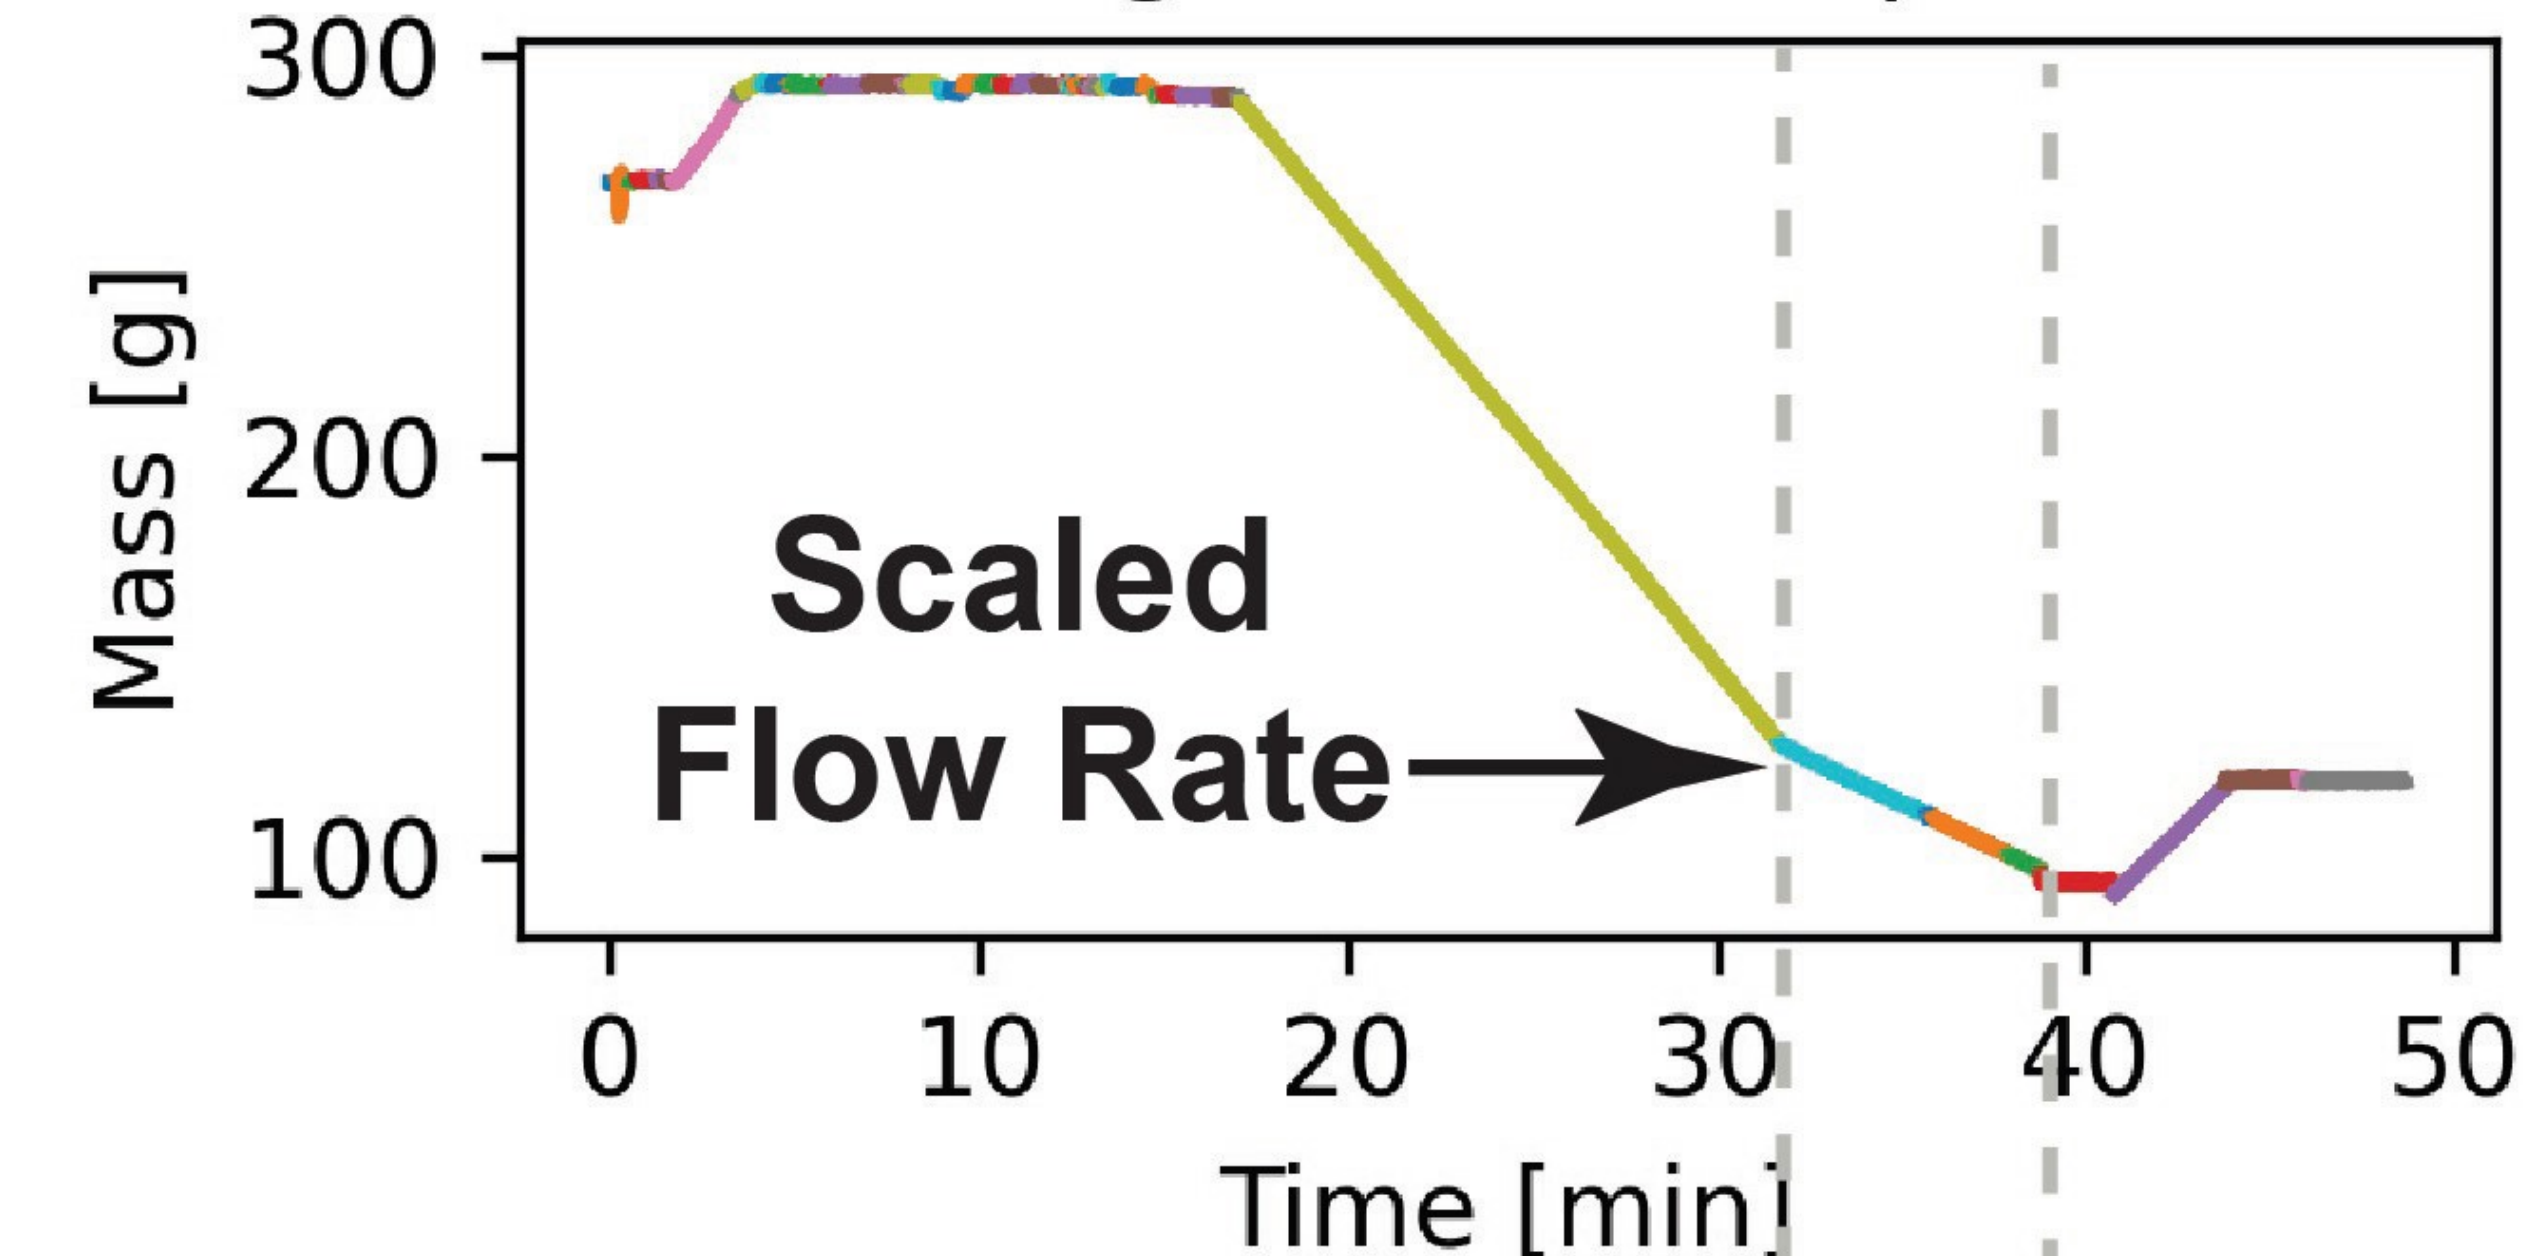

Bag scale product

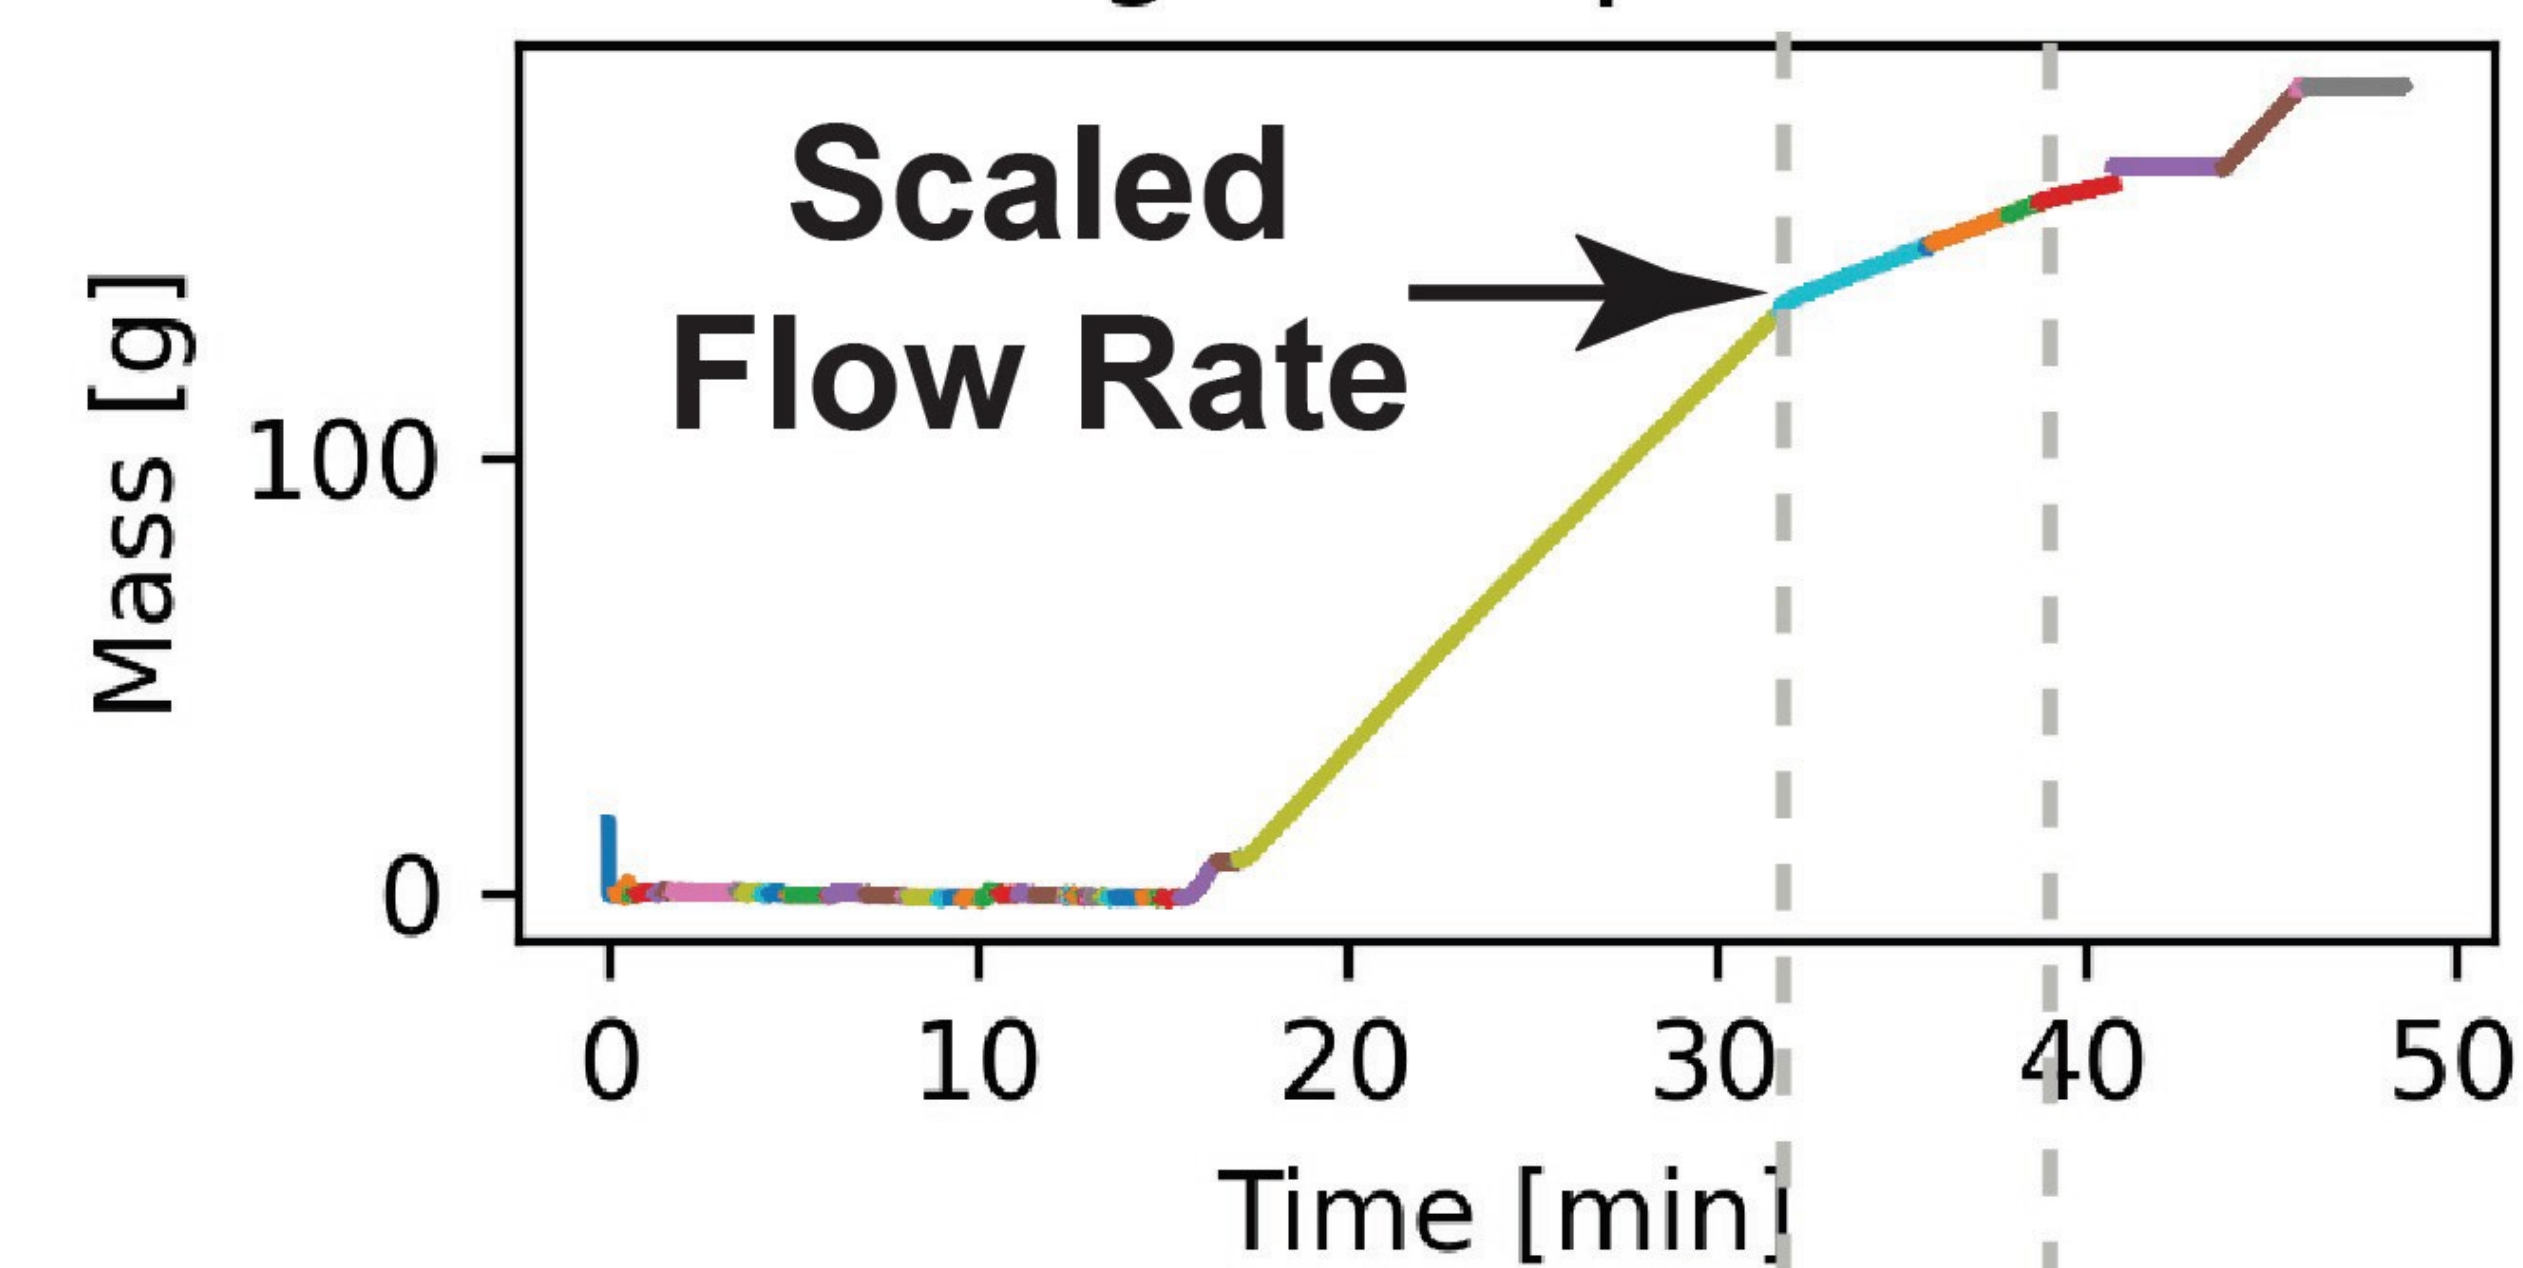

Pressure sensor 2

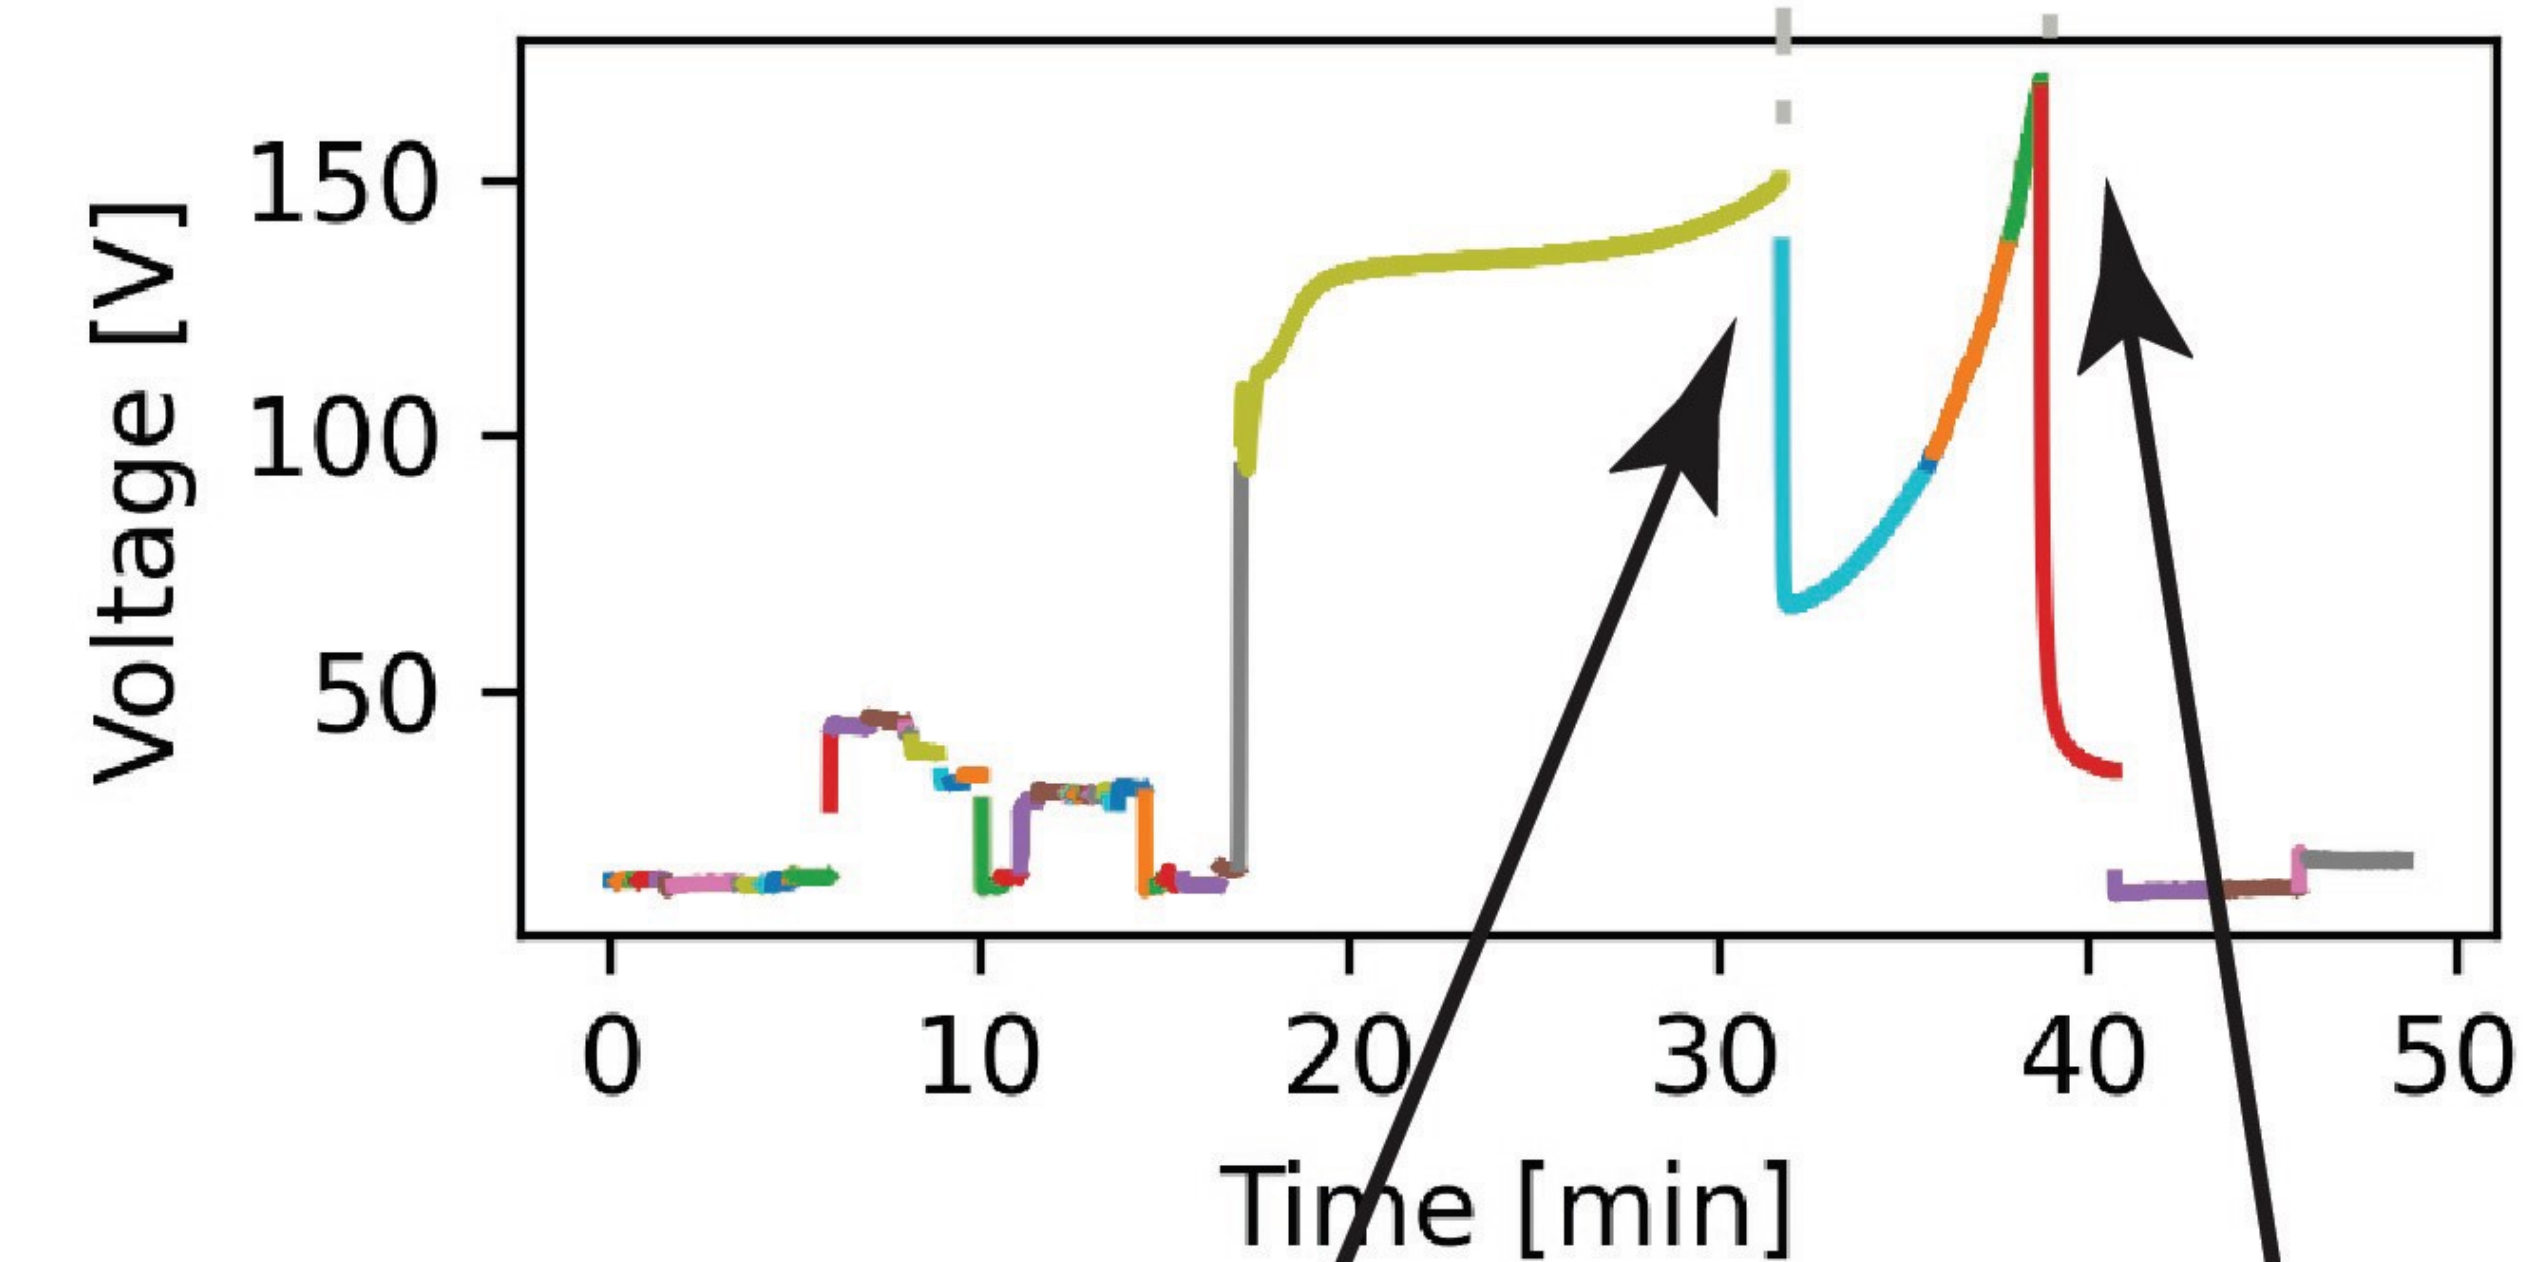

**Autoscale Trigger**

**Abort Trigger**
