# Supplementary figures and images for: Cell therapy manufacturing at full clinical scale: enhancing the quality CAR-T cell therapy starting materials through massively parallel automated microfluidic cell sorting
Source: Royal Society of Chemistry journal article supplement (doi:10.1039/d6lc00072j), 2026-04-02

## Velocity Field

## Shear Rate

Flow Direction

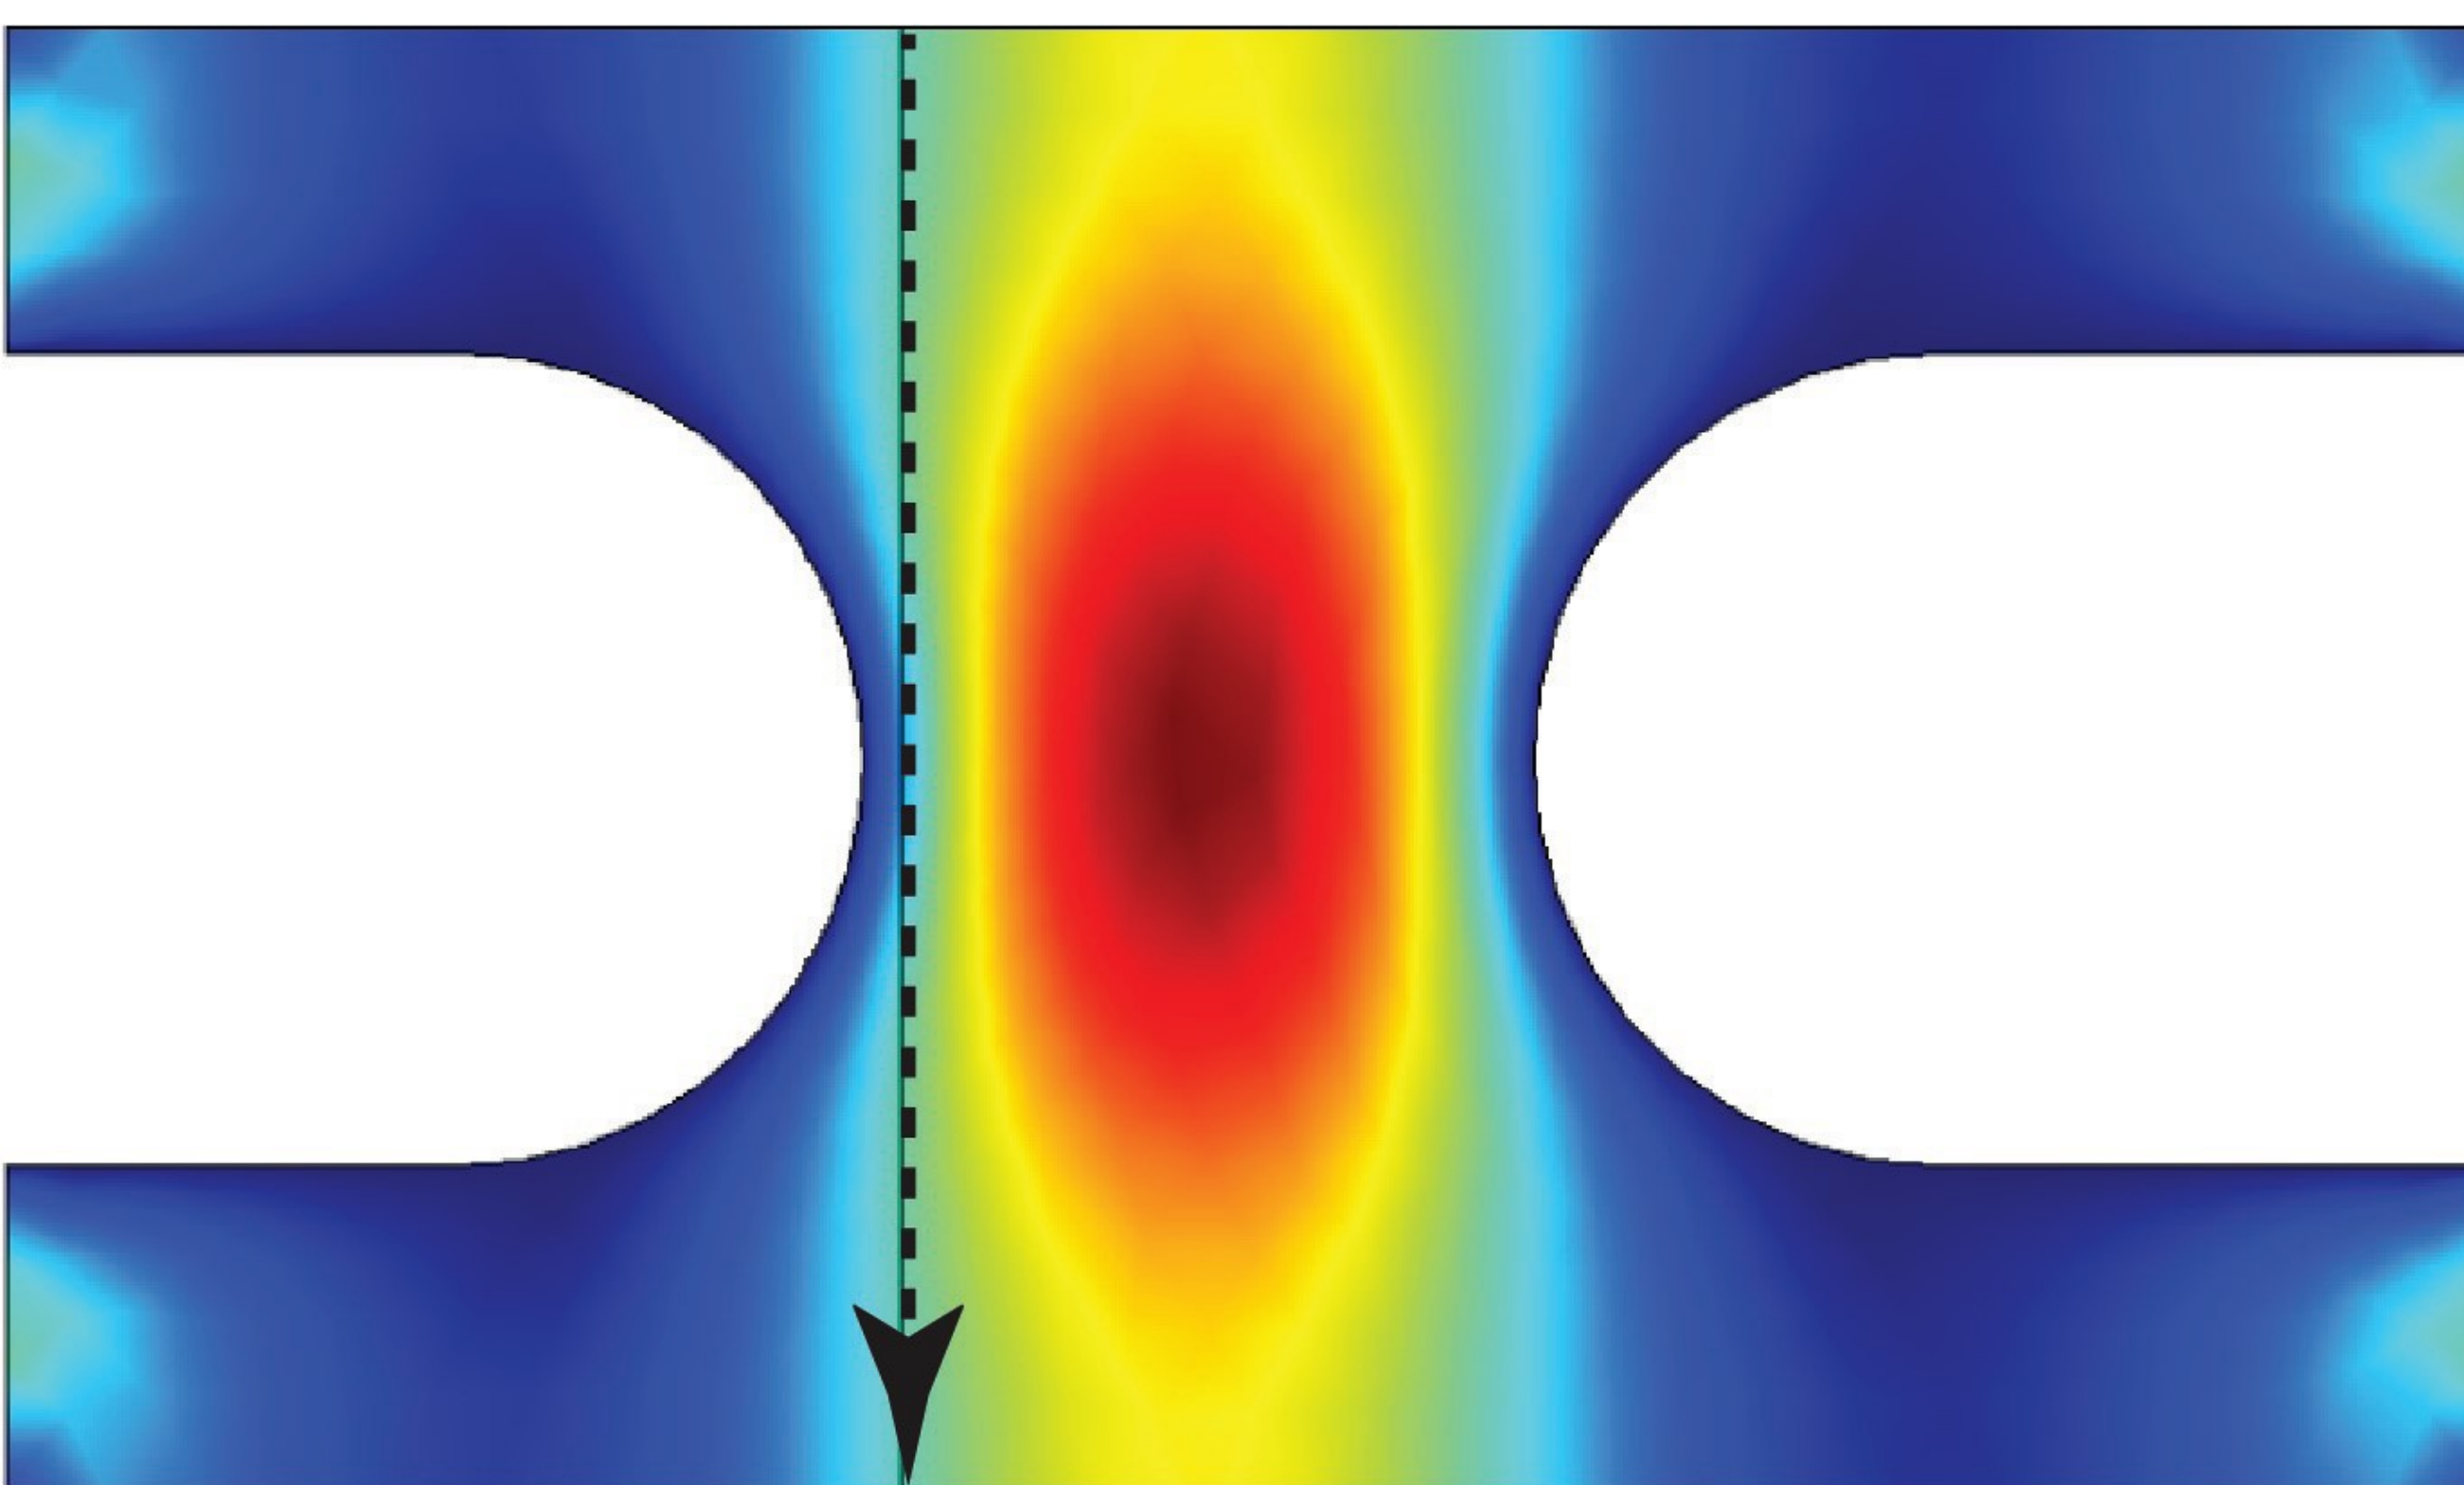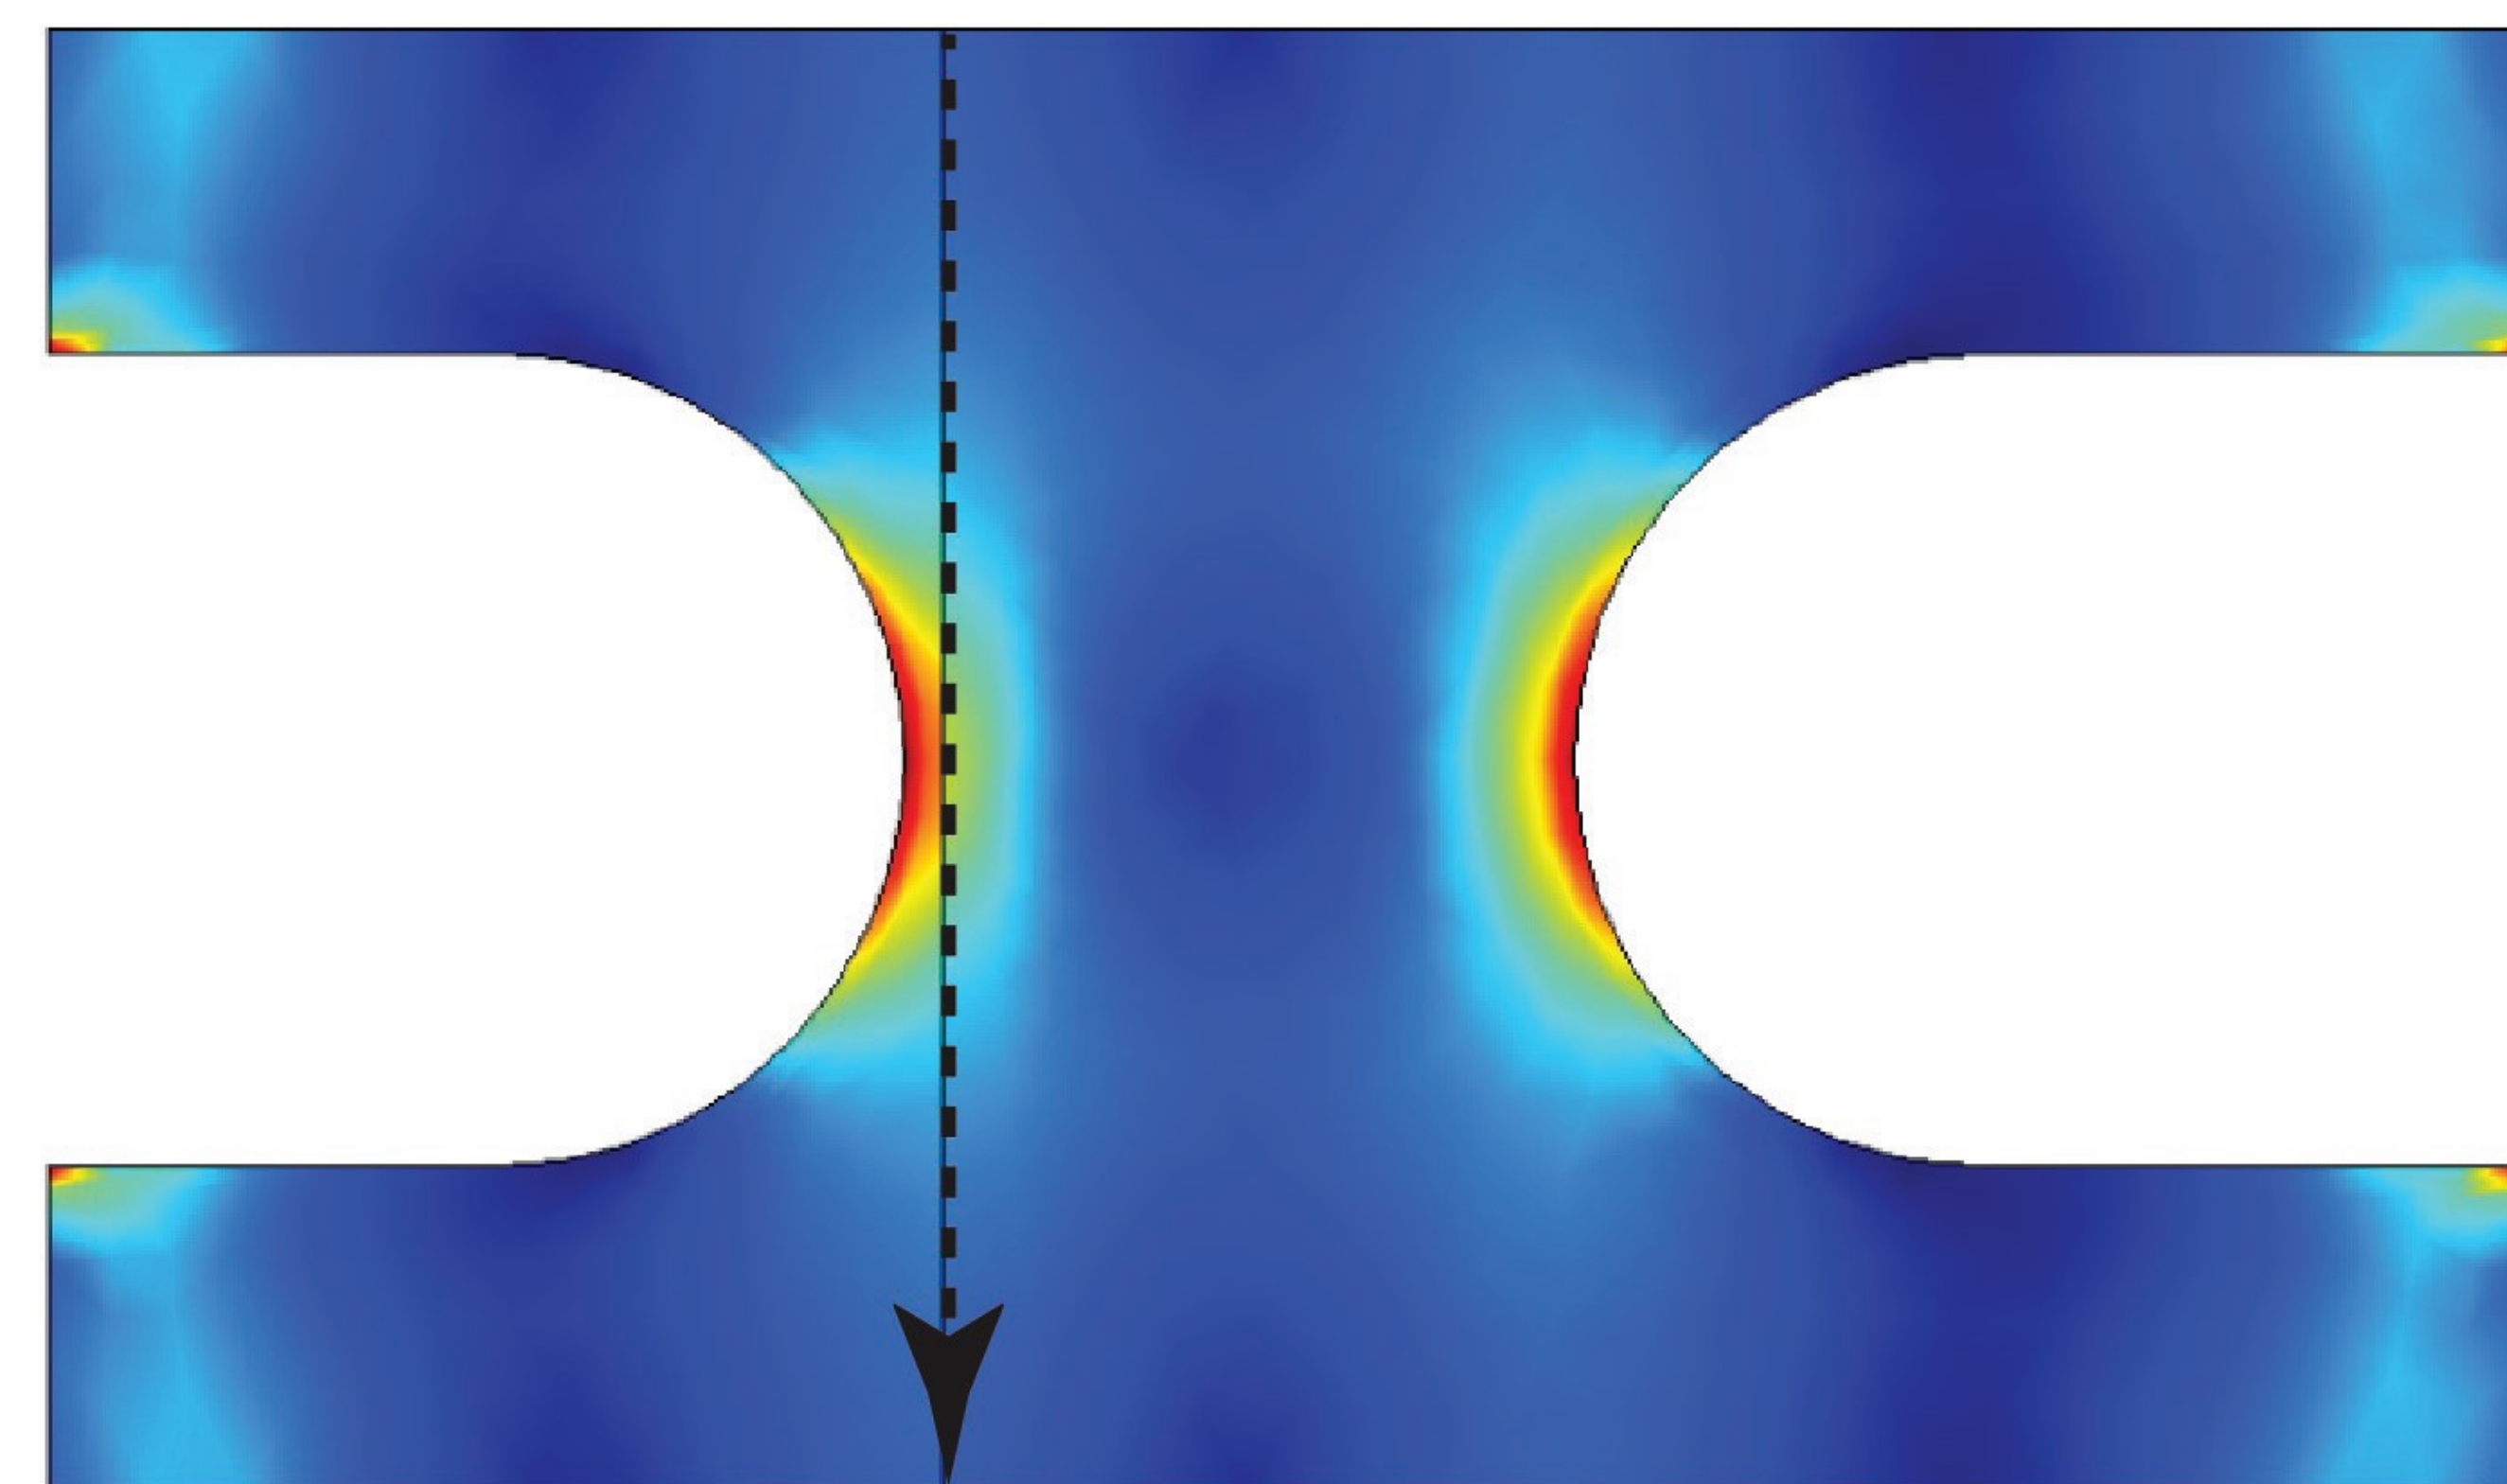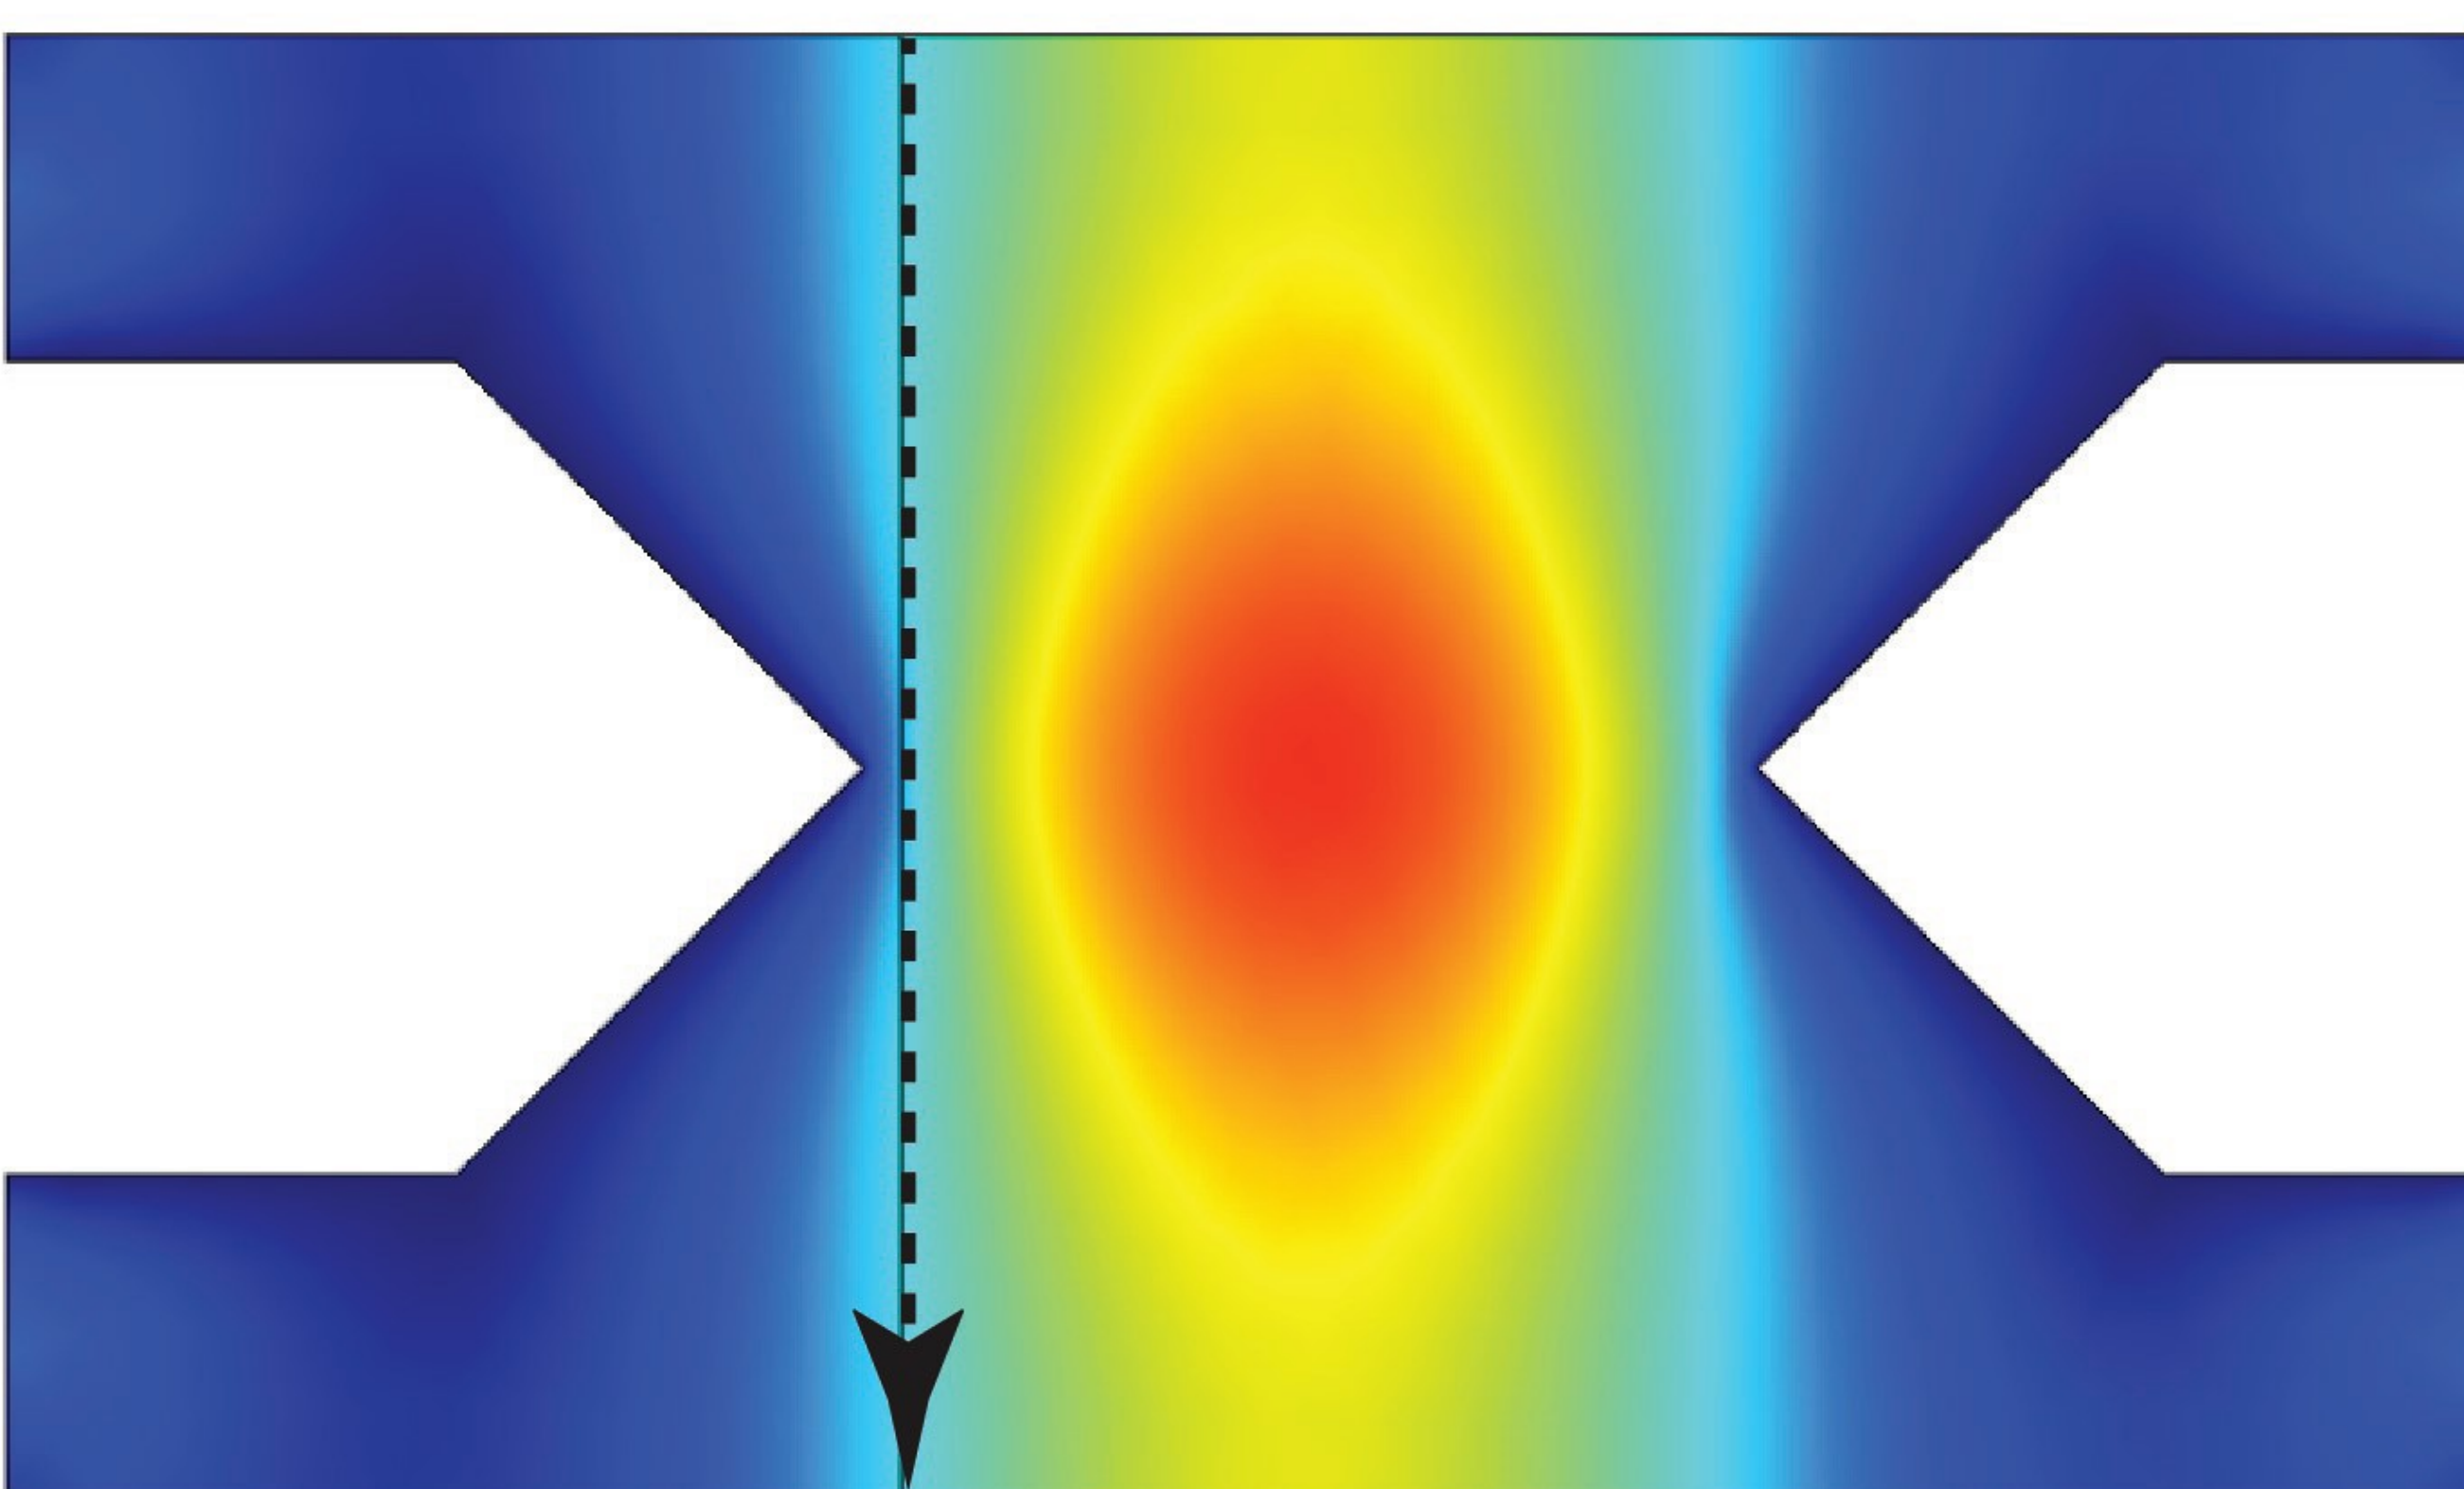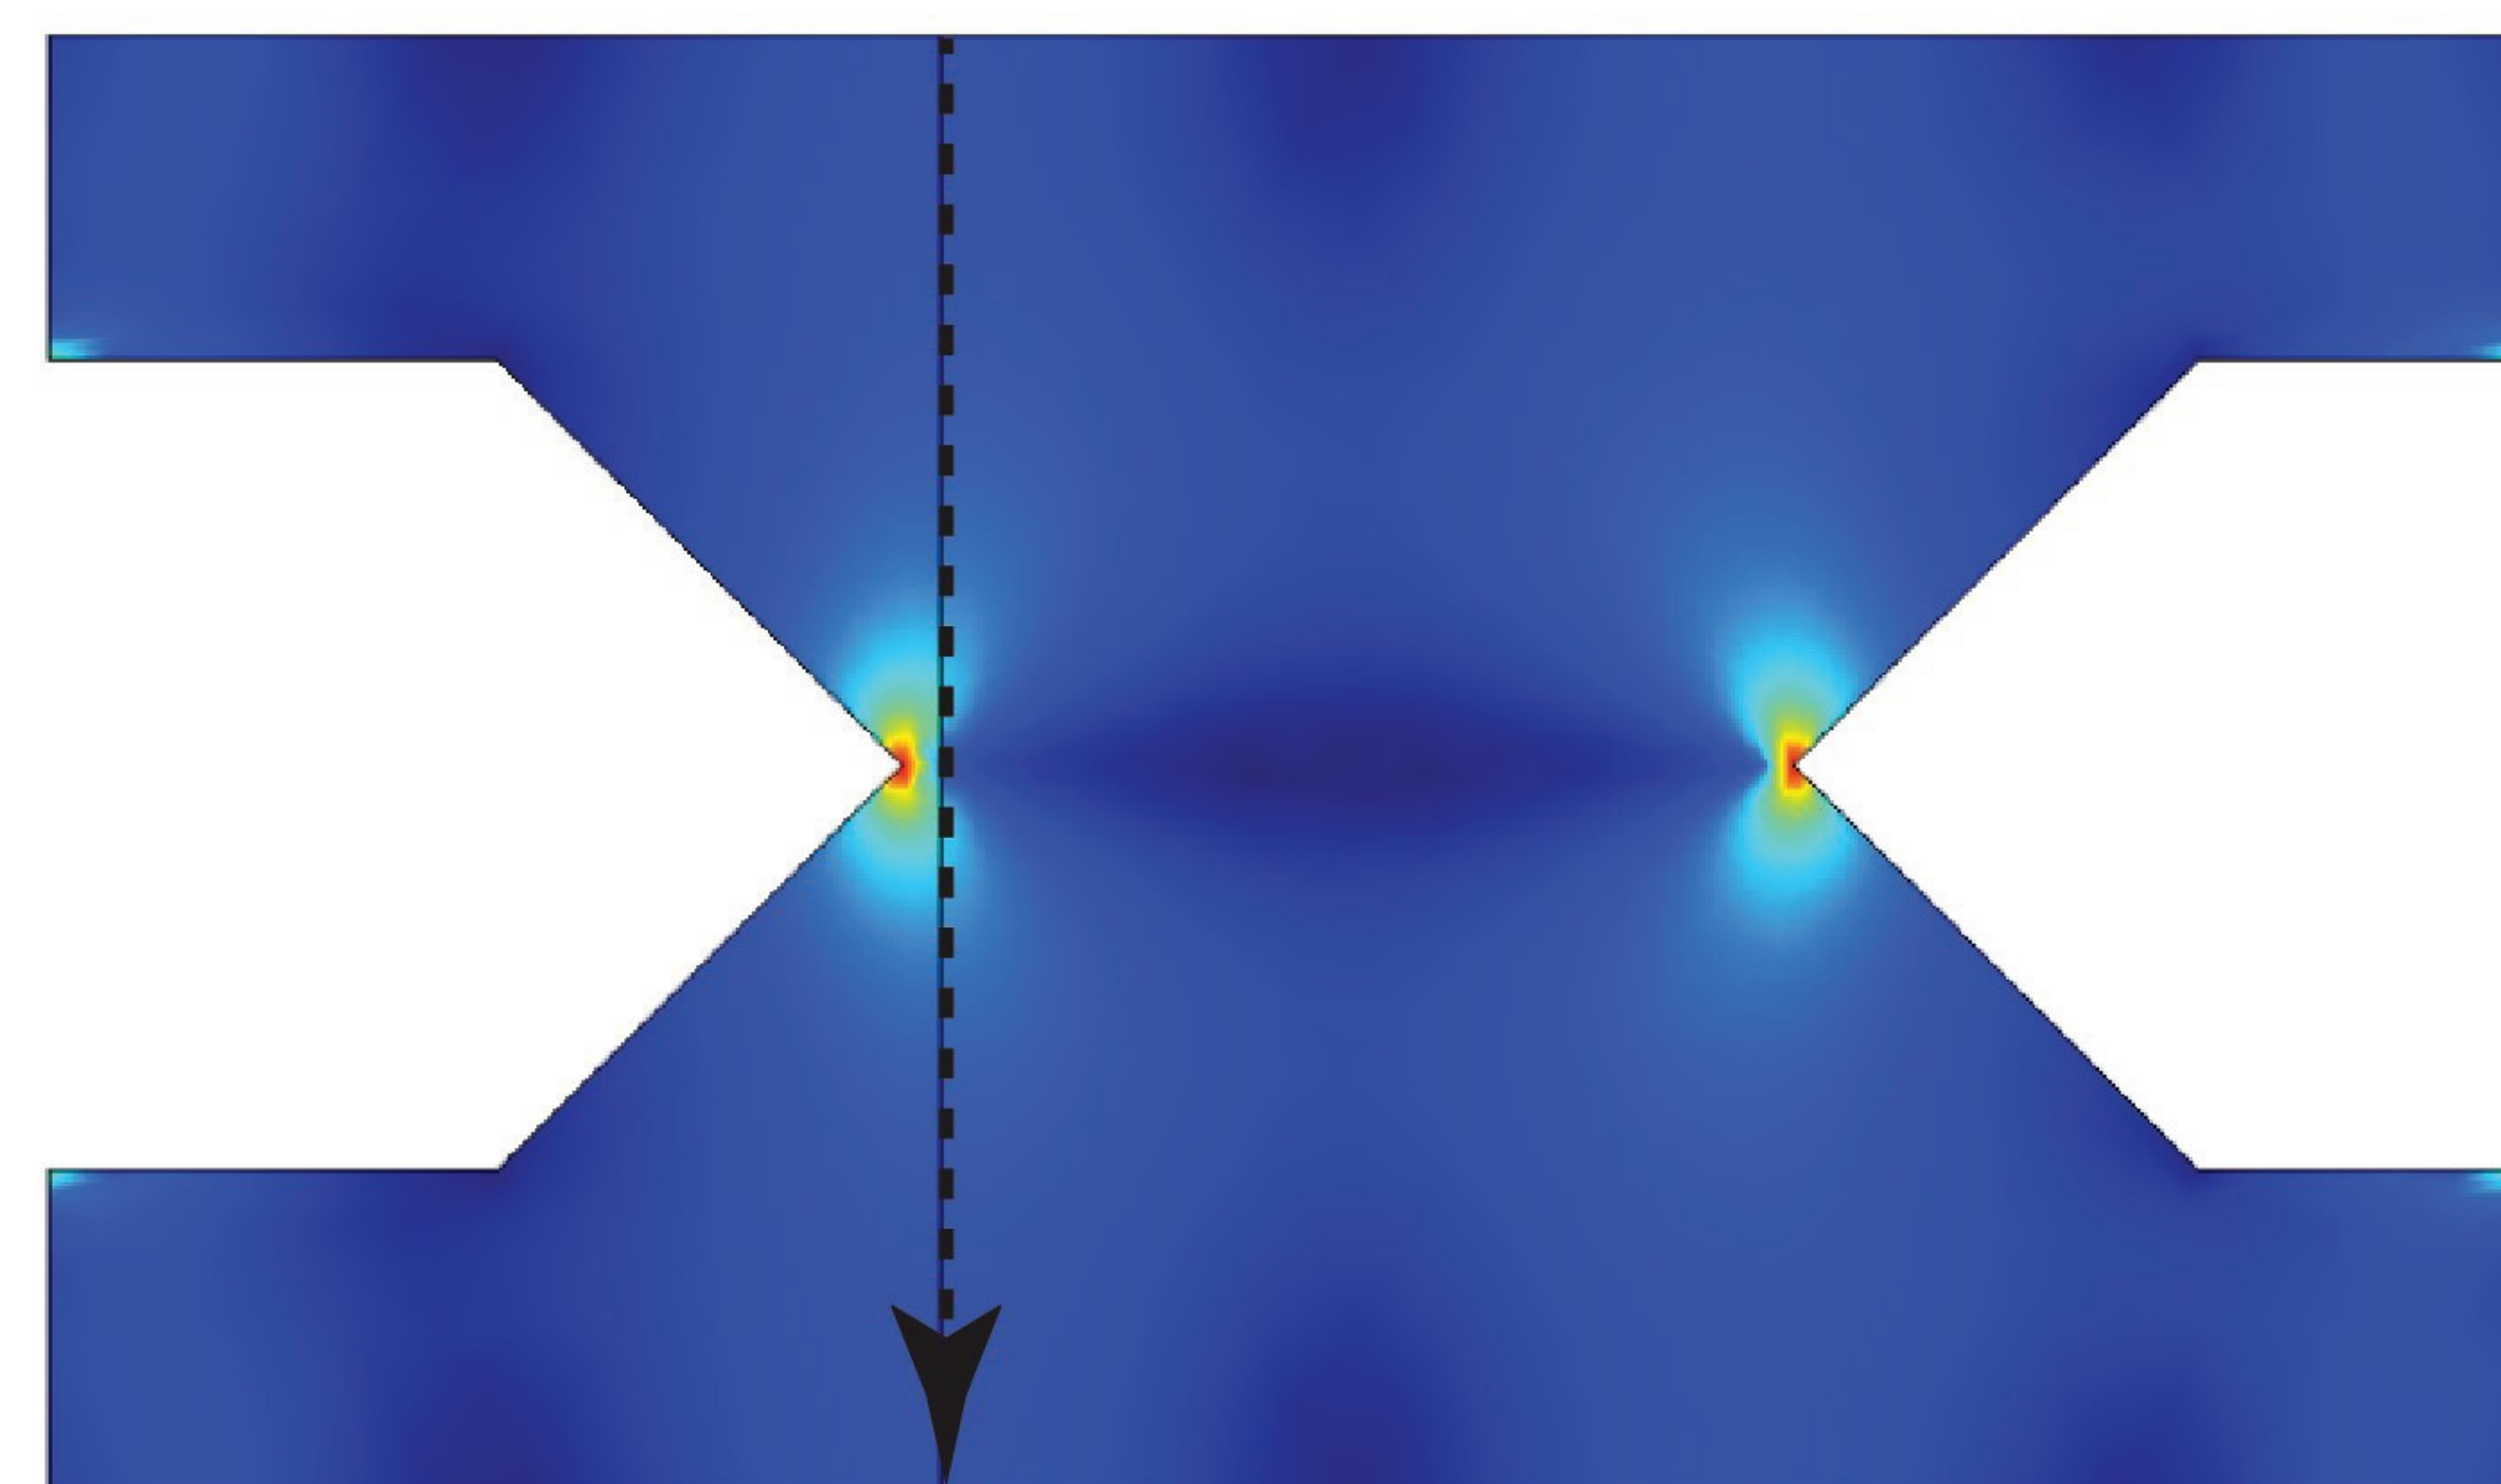

Supplement: d6lc00072j3.pdf [file d6lc00072j3.pdf]
